# Supplementary material
Source: MDPI journal article supplement (https://www.mdpi.com/1424-2818/15/7/841)

**Supplementary Figure S2:** Occurrence maps of species. In red: are points obtained by the systematic review. In purple: points obtained by the Global Biodiversity Information Facility (GBIF) database, *Dilocarcinus pagei* (A) points obtained by the systematic review (n = 42). Points obtained by GBIF database (n = 20); *Macrobrachium amazonicum* (B) points obtained by the systematic review (n = 213); Points obtained by GBIF database (n = 24); *Macrobrachium jelskii* (C) points obtained by the systematic review (n = 19); Points obtained by GBIF database (n = 116); *Macrobrachium rosenbergii* (D) points obtained by the systematic review (n = 116). Points obtained by GBIF database (n = 20) and *Procambarus clarkii* (E) points obtained by the systematic review (n = 908). Points obtained by GBIF database (n = 5481).

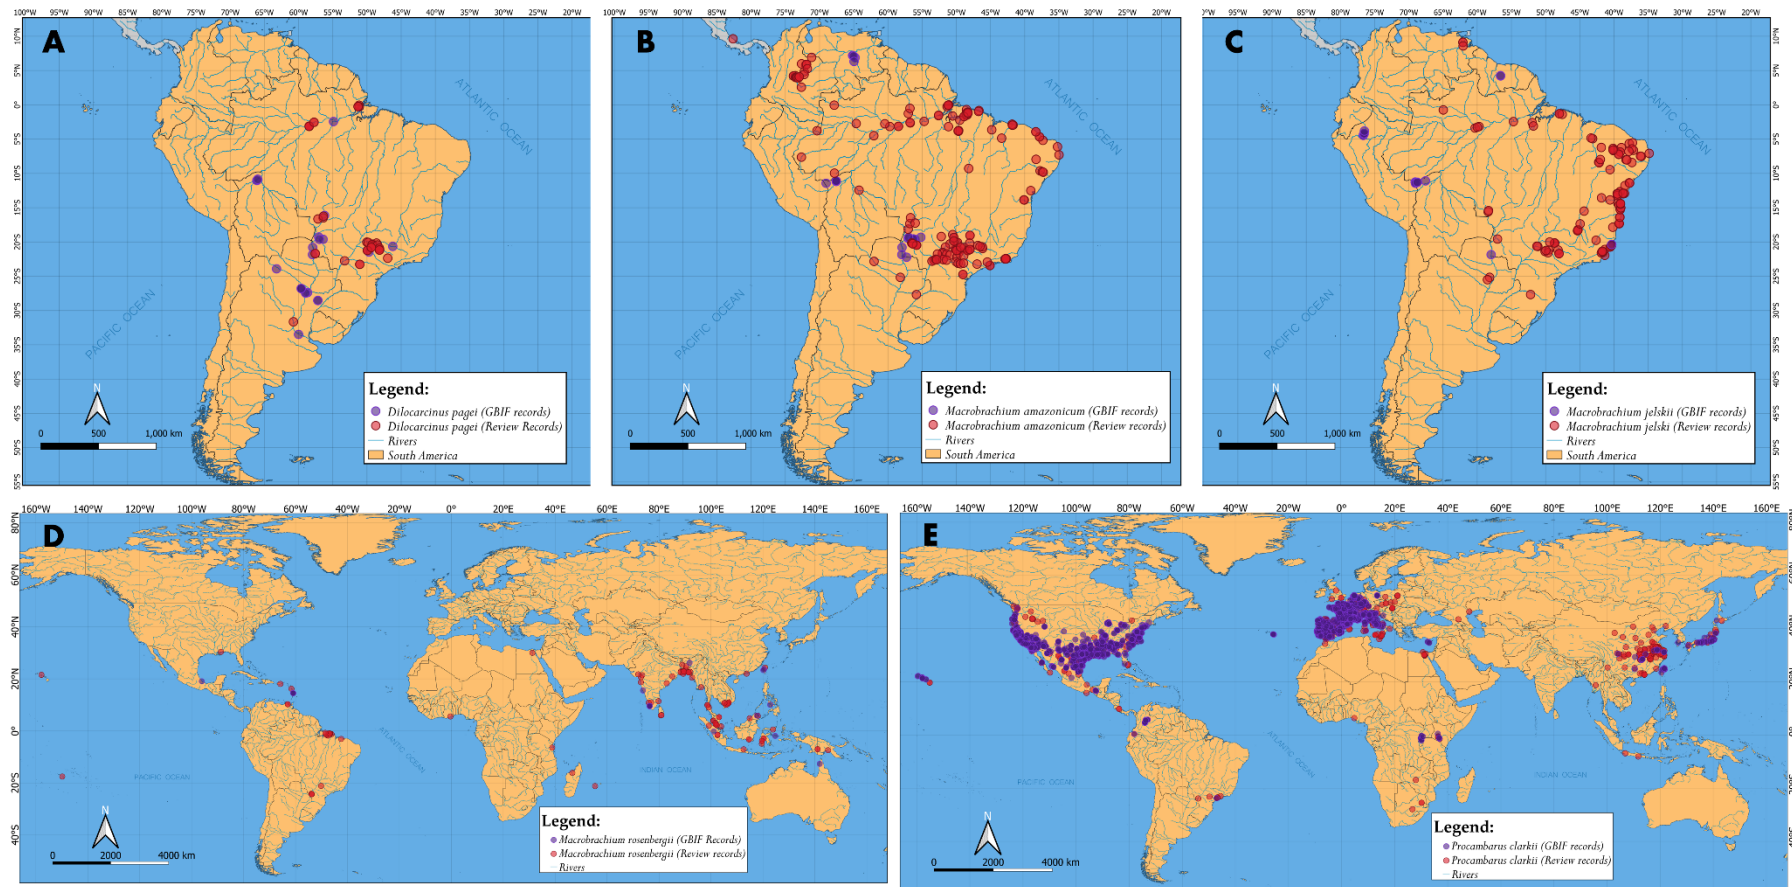

Supplement: s1 [file s1]
