# Supplementary material
Source: MDPI journal article supplement (https://www.mdpi.com/1424-2818/15/7/841)

**Supplementary Figure S1:** Flowchart of the PRISMA Matrix referring to the systematic literature review process. Adapted from Moher et al. (2009, PRISMA Group). [single column]

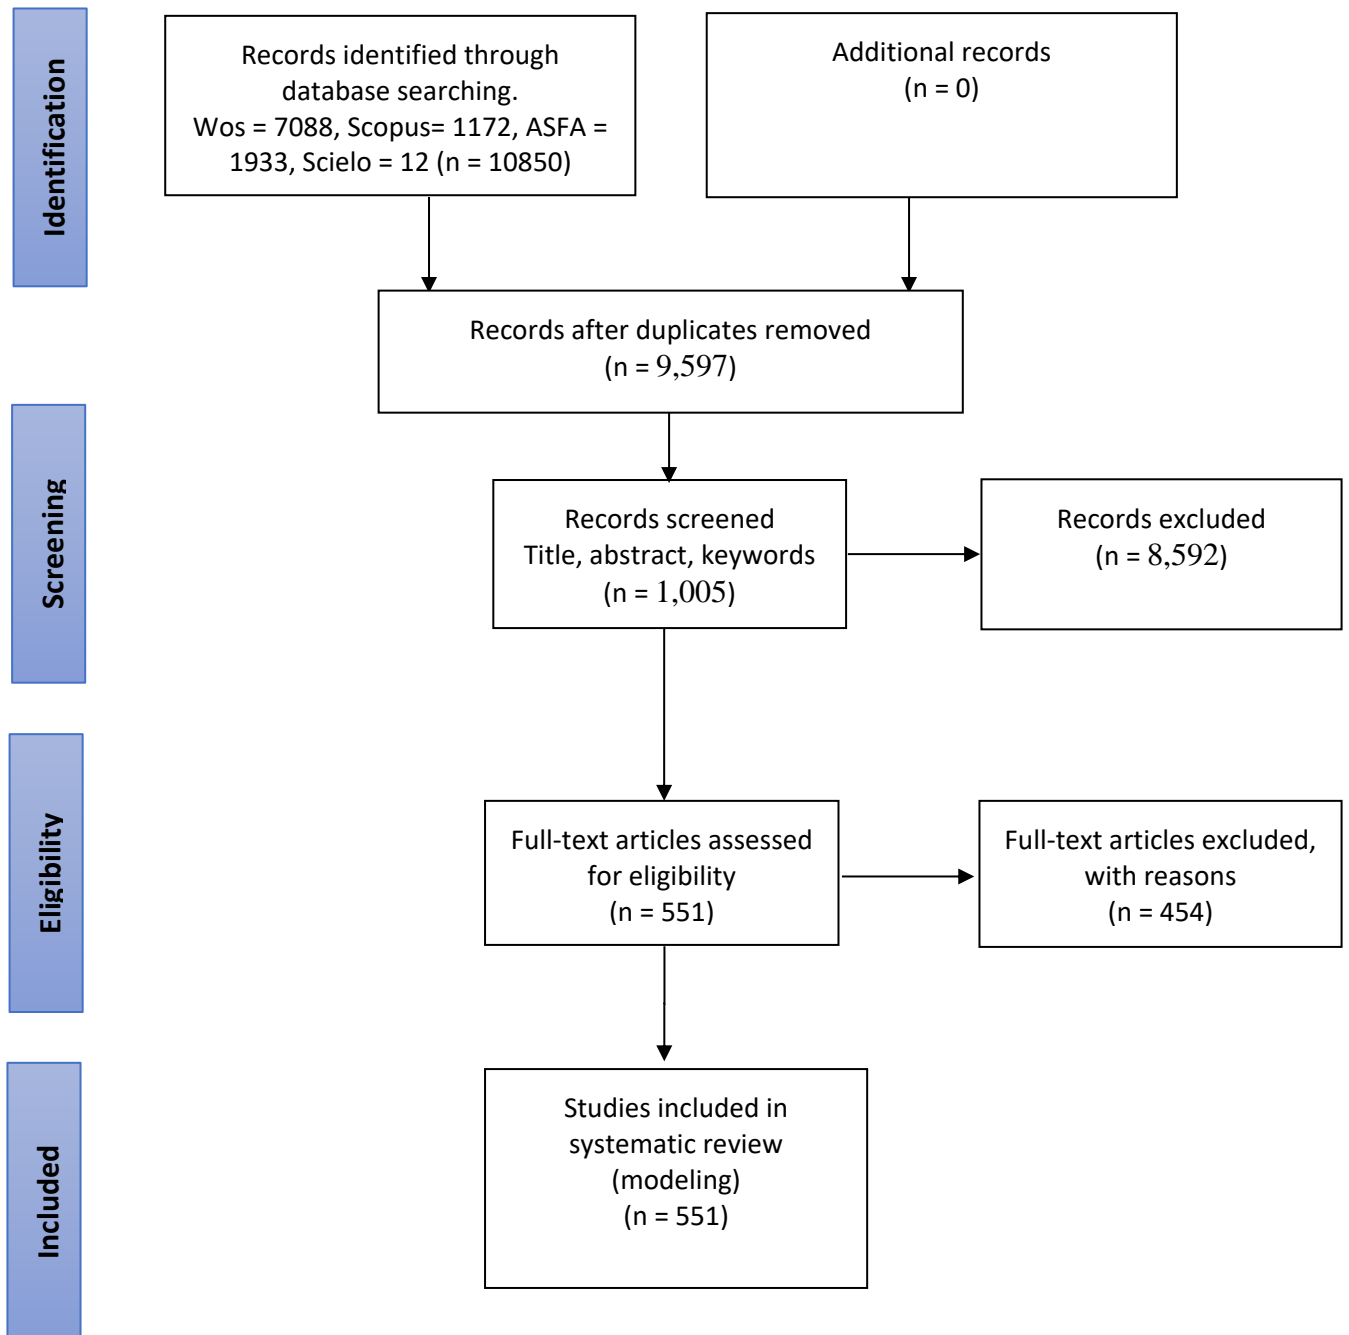

Supplement: s1 [file s1]
