# Supplementary material
Source: MDPI journal article supplement (https://www.mdpi.com/1424-2818/15/7/841)
Supplement: s1 [file s1]

**Supplementary Table S1:** Papers list resulting from the systematic review.

- Abulude, F. O. (2005). Determination of some heavy metals in *Procambarus clarkii*, Palaenon species, *Macrobrachium vollenhovenii* and *Penaeus notalis* from the coastal water of Ondo State, Nigeria. Abstracts of Papers of the American Chemical Society, 229, U62-U62.
- Abumandour, M. M. (2016). Gill Morphology in the Red Swamp Freshwater Crayfish *Procambarus clarkii* (Crustacea: Decapoda: Cambarids) (Girard 1852) from the River Nile and its Branches in Egypt. International Journal of Morphology, 34(1), 168-178. doi:10.4067/s0717-95022016000100025
- Acevedo-Limón, L., Oficialdegui, F. J., Sánchez, M. I., & Clavero, M. (2020). Historical, human, and environmental drivers of genetic diversity in the red swamp crayfish (*Procambarus clarkii*) invading the Iberian Peninsula. Freshwater Biology, 65(8), 1460-1474. doi:10.1111/fwb.13513
- Adams, S. B. (2014). Crayfish use of trash versus natural cover in incised, sand-bed streams. Environ Manage, 53(2), 382-392. doi:10.1007/s00267-013-0197-3  
10.1007/s00267-013-0197-3. Epub 2013 Nov 19.
- Adao, H., & Marques, J. C. (1993). Population Biology of the Red Swamp Crayfish *Procambarus clarkii* (Girard, 1852) in Southern Portugal. Crustaceana, 65(3), 336-345. doi:10.1163/156854093x00766
- Affonso, I. D. P., & Signorelli, L. (2011). Predation on Frogs by the Introduced Crab *Dilocarcinus pagei* Stimpson, 1861 (Decapoda, Trichodactylidae) on a Neotropical Floodplain. Crustaceana, 84(12-13), 1653-1657. doi:10.1163/156854011x605701
- Aflalo, E. D., Hoang, T. T. T., Nguyen, V. H., Lam, Q., Nguyen, D. M., Trinh, Q. S., . . . Sagi, A. (2006). A novel two-step procedure for mass production of all-male populations of the giant freshwater prawn *Macrobrachium rosenbergii*. Aquaculture, 256(1-4), 468-478. doi:10.1016/j.aquaculture.2006.01.035
- Aflalo, E. D., Raju, D. V. S. N., Bommi, N. A., Verghese, J. T., Samraj, T. Y. C., Hulata, G., . . . Sagi, A. (2012). Toward a sustainable production of genetically improved all-male prawn (*Macrobrachium rosenbergii*): Evaluation of production traits and obtaining neo-females in three Indian strains. Aquaculture, 338-341, 197-207. doi:10.1016/j.aquaculture.2012.01.025
- Agarwal, D., Aich, N., Pavan-Kumar, A., Kumar, S., Sabnis, S., Joshi, C. G., . . . Chaudhari, A. (2016). SNP mining in transcripts and concomitant estimation of genetic variation in *Macrobrachium rosenbergii* stocks. Conservation Genetics Resources, 8(2), 159-168. doi:10.1007/s12686-016-0528-9
- Ahearn, G. A., & Maginniss, L. A. (1977). Kinetics of glucose transport by the perfused mid-gut of the freshwater prawn *Macrobrachium rosenbergii*. J Physiol, 271(2), 319-336. doi:10.1113/jphysiol.1977.sp012002  
10.1113/jphysiol.1977.sp012002.

- Ahmed, A. S. S., Hossain, M. B., Semme, S. A., Babu, S., Hossain, K., & Moniruzzaman, M. (2020). Accumulation of trace elements in selected fish and shellfish species from the largest natural carp fish breeding basin in Asia: a probabilistic human health risk implication. *Environ Sci Pollut Res Int*, 27(30), 37852-37865. doi:10.1007/s11356-020-09766-1
- Ahmed, M. K., Baki, M. A., Islam, M. S., Kundu, G. K., Habibullah-Al-Mamun, M., Sarkar, S. K., & Hossain, M. M. (2015). Human health risk assessment of heavy metals in tropical fish and shellfish collected from the river Buriganga, Bangladesh. *Environ Sci Pollut Res Int*, 22(20), 15880-15890. doi:10.1007/s11356-015-4813-z
- Ahmed, N., Allison, E. H., & Muir, J. F. (2008). Using the Sustainable Livelihoods Framework to Identify Constraints and Opportunities to the Development of Freshwater Prawn Farming in Southwest Bangladesh. *Journal of the World Aquaculture Society*, 39(5), 598-611. doi:10.1111/j.1749-7345.2008.00198.x
- Ahmed, N., Allison, E. H., & Muir, J. F. (2009). Rice fields to prawn farms: a blue revolution in southwest Bangladesh? *Aquaculture International*, 18(4), 555-574. doi:10.1007/s10499-009-9276-0
- Ahmed, N., & Garnett, S. T. (2010). Sustainability of Freshwater Prawn Farming in Rice Fields in Southwest Bangladesh. *Journal of Sustainable Agriculture*, 34(6), 659-679. doi:10.1080/10440046.2010.493397
- Ahmed, N., & Garnett, S. T. (2011). Integrated rice-fish farming in Bangladesh: meeting the challenges of food security. *Food Security*, 3(1), 81-92. doi:10.1007/s12571-011-0113-8
- Ahmed, N., & Troell, M. (2010). Fishing for prawn larvae in Bangladesh: an important coastal livelihood causing negative effects on the environment. *Ambio*, 39(1), 20-29. doi:10.1007/s13280-009-0002-y
- Ahmed, N., Zander, K. K., & Garnett, S. T. (2011). Socioeconomic aspects of rice-fish farming in Bangladesh: opportunities, challenges and production efficiency\*. *Australian Journal of Agricultural and Resource Economics*, 55(2), 199-219. doi:10.1111/j.1467-8489.2011.00535.x
- Al Kaddissi, S., Legeay, A., Elia, A. C., Gonzalez, P., Camilleri, V., Gilbin, R., & Simon, O. (2012). Effects of uranium on crayfish *Procambarus clarkii* mitochondria and antioxidants responses after chronic exposure: what have we learned? *Ecotoxicol Environ Saf*, 78, 218-224. doi:10.1016/j.ecoenv.2011.11.026
- Al Kaddissi, S., Simon, O., Elia, A. C., Gonzalez, P., Floriani, M., Cavalie, I., . . . Legeay, A. (2016). How toxic is the depleted uranium to crayfish *Procambarus clarkii* compared with cadmium? *Environ Toxicol*, 31(2), 211-223. doi:10.1002/tox.22036
- Albuquerque, F. E. A., Minervino, A. H. H., Miranda, M., Herrero-Latorre, C., Barrêto Júnior, R. A., Oliveira, F. L. C., . . . López-Alonso, M. (2020). Toxic and essential trace element concentrations in the freshwater shrimp *Macrobrachium amazonicum* in the Lower Amazon, Brazil. *Journal of Food Composition and Analysis*, 86. doi:10.1016/j.jfca.2019.103361

- Alcorlo, P., & Baltanás, A. (2013). The trophic ecology of the red swamp crayfish (*Procambarus clarkii*) in Mediterranean aquatic ecosystems: A stable isotope study. *Limnetica*, 32(1), 121-138.
- Alcorlo, P., Geiger, W., & Otero, M. (2009). Reproductive biology and life cycle of the invasive crayfish *Procambarus clarkii* (Crustacea: Decapoda) in diverse aquatic habitats of South-Western Spain: Implications for population control. *Fundamental and Applied Limnology*, 173(3), 197-212. doi:10.1127/1863-9135/2008/0173-0197
- Alcorlo, P., Lozano, I., & Baltanás, A. (2019). Heavy metals effects on life traits of juveniles of *Procambarus clarkii*. *AIMS Environmental Science*, 6(3), 147-166. doi:10.3934/environsci.2019.3.147
- Alcorlo, P., Otero, M., Crehuet, M., Baltanas, A., & Montes, C. (2006). The use of the red swamp crayfish (*Procambarus clarkii*, Girard) as indicator of the bioavailability of heavy metals in environmental monitoring in the River Guadiamar (SW, Spain). *Sci Total Environ*, 366(1), 380-390. doi:10.1016/j.scitotenv.2006.02.023
- Al-Hossain, M. Q., Karim, M. A., & Hadiuzzaman, M. (2011). Establishment of environmental flow in a physically obstructed tidal river.
- Almeida, D., Barrientos, R., Merino-Aguirre, R., & Angeler, D. G. (2012). The role of prey abundance and flow regulation in the marking behaviour of Eurasian otters in a Mediterranean catchment. *Animal Behaviour*, 84(6), 1475-1482. doi:10.1016/j.anbehav.2012.09.020
- Almeida, V. L. L., Hahn, N. S., & Vazzoler, A. E. A. d. M. (1997). Feeding patterns in five predatory fishes of the high Parana River floodplain (PR, Brazil). *Ecology of Freshwater Fish*, 6(3), 123-133. doi:10.1111/j.1600-0633.1997.tb00154.x
- Alonso, F., & MartíÑez, R. (2006). Shelter Competition between Two Invasive Crayfish Species: A Laboratory Study. *Bulletin Français de la Pêche et de la Pisciculture*, (380-381), 1121-1132. doi:10.1051/kmae:2006015
- Aly, W., El-Far, A., & A. Fetouh, M. (2020). Some Fisheries and Biological Aspects of the Crayfish *Procambarus clarkii* (Girard, 1852) in the River Nile, Egypt. *Egyptian Journal of Aquatic Biology and Fisheries*, 24(4), 33-42. doi:10.21608/ejabf.2020.94125
- Amado, E. M., Freire, C. A., & Souza, M. M. (2006). Osmoregulation and tissue water regulation in the freshwater red crab *Dilocarcinus pagei* (Crustacea, Decapoda), and the effect of waterborne inorganic lead. *Aquat Toxicol*, 79(1), 1-8. doi:10.1016/j.aquatox.2006.04.003
- Amori, G., & Battisti, C. (2008). An invaded wet ecosystem in Central Italy: An arrangement and evidence for an alien food chain. *Rendiconti Lincei*, 19(2), 161-171. doi:10.1007/s12210-008-0009-5
- An, Z., Zhang, Y., & Sun, L. (2018). Effects of Dietary Astaxanthin Supplementation on Energy Budget and Bioaccumulation in *Procambarus clarkii* (Girard, 1852) Crayfish under Microcystin-LR Stress. *Toxins (Basel)*, 10(7). doi:10.3390/toxins10070277

- Anandkumar, A., Li, J., Prabakaran, K., Xi Jia, Z., Leng, Z., Nagarajan, R., & Du, D. (2020). Accumulation of toxic elements in an invasive crayfish species (*Procambarus clarkii*) and its health risk assessment to humans. *Journal of Food Composition and Analysis*, 88. doi:10.1016/j.jfca.2020.103449
- Anastácio, P. M., Banha, F., Capinha, C., Bernardo, J. M., Costa, A. M., Teixeira, A., & Bruxelas, S. (2015). Indicators of movement and space use for two co-occurring invasive crayfish species. *Ecological Indicators*, 53, 171-181. doi:10.1016/j.ecolind.2015.01.019
- Anastácio, P. M., Ferreira, M. P., Banha, F., Capinha, C., & Rabaça, J. E. (2013). Waterbird-mediated passive dispersal is a viable process for crayfish (*Procambarus clarkii*). *Aquatic Ecology*, 48(1), 1-10. doi:10.1007/s10452-013-9461-0
- Anastácio, P. M., Frias, A. F., & Marques, J. C. (1999). CRISP (crayfish and rice integrated system of production): 1. Modelling rice (*Oryza sativa*) growth and production. *Ecological Modelling*, 123(1), 17-28. doi:10.1016/s0304-3800(99)00069-1
- Anastácio, P. M., Frias, A. F., & Marques, J. C. (2000). Impact of crayfish densities on wet seeded rice and the inefficiency of a non-ionic surfactant as an ecotechnological solution. *Ecological Engineering*, 15(1-2), 17-25. doi:10.1016/s0925-8574(99)00014-2
- Anastácio, P. M., Leitão, A. S., Boavida, M. J., & Correia, A. M. (2009). Population dynamics of the invasive crayfish (*Procambarus clarkii* Girard, 1852) at two marshes with differing hydroperiods. *Annales de Limnologie - International Journal of Limnology*, 45(4), 247-256. doi:10.1051/limn/2009025
- Anastácio, P. M., Leite, E. P., Ferreira, M., Vicente, L., & Correia, A. M. (2011). Ontogenic shifts in predatory roles involving two invasive species. *Limnologica*, 41(3), 228-234. doi:10.1016/j.limno.2010.12.002
- Anastacio, P. M., & Marques, J. C. (1995). Population Biology and Production of the Red Swamp Crayfish *Procambarus clarkii* (Girard) in the Lower Mondego River Valley, Portugal. *Journal of Crustacean Biology*, 15(1). doi:10.2307/1549018
- Anastacio, P. M., & Marques, J. C. Crayfish, *Procambarus clarkii*, effects on initial stages of rice growth in the lower Mondego River valley (Portugal) 1997.
- Anastácio, P. M., & Marques, J. C. (1998). Crayfish (*Procambarus clarkii*) Condition Throughout the Year in the Lower Mondego River Valley, Portugal. *Crustaceana*, 71(6), 593-602. doi:10.1163/156854098x00590
- Anastácio, P. M., Nielsen, S. N., & Marques, J. C. (1999). CRISP (crayfish and rice integrated system of production): 2. Modelling crayfish (*Procambarus clarkii*) population dynamics. *Ecological Modelling*, 123(1), 5-16. doi:10.1016/s0304-3800(99)00164-7
- Anastácio, P. M., Nielsen, S. N., Marques, J. C., & Jørgensen, S. E. (1995). Integrated production of crayfish and rice: a management model. *Ecological Engineering*, 4(3), 199-210. doi:10.1016/0925-8574(94)00059-e
- Anastacio, P. M., Soares, M., & Correia, A. M. (2005). Crayfish (*Procambarus clarkii*) consumption of wet-seeded rice plants (*Oryza sativa*): modifications throughout the rice

growing period. International Association of Theoretical and Applied Limnology - Proceedings, 29.

- Anderson, M. B., Reddy, P., Preslan, J. E., Fingerman, M., Bollinger, J., Jolibois, L., . . . George, W. J. (1997). Metal accumulation in crayfish, *Procambarus clarkii*, exposed to a petroleum-contaminated Bayou in Louisiana. *Ecotoxicol Environ Saf*, 37(3), 267-272. doi:10.1006/eesa.1997.1561
- Angeler, D. G., Sánchez-Carrillo, S., García, G., & Alvarez-Cobelas, M. (2001). The influence of *Procambarus clarkii* (Cambaridae, Decapoda) on water quality and sediment characteristics in a Spanish floodplain wetland. *Hydrobiologia*, 464(1/3), 89-98. doi:10.1023/a:1013950129616
- Anger, K., & Hayd, L. (2009). From lecithotrophy to planktotrophy: ontogeny of larval feeding in the Amazon River prawn *Macrobrachium amazonicum*. *Aquatic Biology*, 7(1-2), 19-30. doi:10.3354/ab00180
- Anger, K., & Hayd, L. (2010). Feeding and growth in early larval shrimp *Macrobrachium amazonicum* from the Pantanal, southwestern Brazil. *Aquatic Biology*, 9(3), 251-261. doi:10.3354/ab00259
- Anger, K., Hayd, L., Knott, J., & Nettelmann, U. (2009). Patterns of larval growth and chemical composition in the Amazon River prawn, *Macrobrachium amazonicum*. *Aquaculture*, 287(3-4), 341-348. doi:10.1016/j.aquaculture.2008.10.042
- Ansah, E., Nukpezah, D., & Hogarth, J. N. (2018). Levels and distribution of heavy metals in Weija reservoir, Accra, Ghana. *West African Journal of Applied Ecology*, 26(1), 74-88.
- Antunes, M., Silva, A. R. d., & Negreiros-Fransozo, M. L. (2020). Range expansion of *Procambarus clarkii* (Girard, 1852) (Decapoda: Cambaridae) in southern Brazil. *Nauplius*, 28. doi:10.1590/2358-2936e2020037
- Aquiloni, L., Becciolini, A., Berti, R., Porciani, S., Trunfio, C., & Gherardi, F. (2009). Managing invasive crayfish: use of X-ray sterilisation of males. *Freshwater Biology*, 54(7), 1510-1519. doi:10.1111/j.1365-2427.2009.02169.x
- Aquiloni, L., Brusconi, S., Cecchinelli, E., Tricarico, E., Mazza, G., Paglianti, A., & Gherardi, F. (2010). Biological control of invasive populations of crayfish: the European eel (*Anguilla anguilla*) as a predator of *Procambarus clarkii*. *Biological Invasions*, 12(11), 3817-3824. doi:10.1007/s10530-010-9774-z
- Aquiloni, L., & Gherardi, F. (2007). Mutual mate choice in crayfish: large body size is selected by both sexes, virginity by males only. *Journal of Zoology*, 274(2), 171-179. doi:10.1111/j.1469-7998.2007.00370.x
- Aquiloni, L., & Gherardi, F. (2008). Assessing mate size in the red swamp crayfish *Procambarus clarkii*: effects of visual versus chemical stimuli. *Freshwater Biology*, 53(3), 461-469. doi:10.1111/j.1365-2427.2007.01911.x
- Aquiloni, L., & Gherardi, F. (2008). Evidence of female cryptic choice in crayfish. *Biol Lett*, 4(2), 163-165. doi:10.1098/rsbl.2007.0590

- Aquiloni, L., & Gherardi, F. (2008). Extended Mother-Offspring Relationships in Crayfish: The Return Behaviour of Juvenile *Procambarus clarkii*. *Ethology*, 114(10), 946-954. doi:10.1111/j.1439-0310.2008.01547.x
- Aquiloni, L., & Gherardi, F. (2010). Crayfish females eavesdrop on fighting males and use smell and sight to recognize the identity of the winner. *Animal Behaviour*, 79(2), 265-269. doi:10.1016/j.anbehav.2009.09.024
- Aquiloni, L., & Gherardi, F. (2010). The use of sex pheromones for the control of invasive populations of the crayfish *Procambarus clarkii*: a field study. *Hydrobiologia*, 649(1), 249-254. doi:10.1007/s10750-010-0253-4
- Aquiloni, L., Giulianini, P. G., Mosco, A., Guarnaccia, C., Ferrero, E., & Gherardi, F. (2012). Crustacean hyperglycemic hormone (cHH) as a modulator of aggression in crustacean decapods. *PLoS One*, 7(11), e50047. doi:10.1371/journal.pone.0050047
- Aquiloni, L., Gonçalves, V., Inghilesi, A. F., & Gherardi, F. (2012). Who's what? Prompt recognition of social status in crayfish. *Behavioral Ecology and Sociobiology*, 66(5), 785-790. doi:10.1007/s00265-012-1326-3
- Aquiloni, L., Ilhéu, M., & Gherardi, F. (2005). Habitat use and dispersal of the invasive crayfish *Procambarus clarkii* in ephemeral water bodies of Portugal. *Marine and Freshwater Behaviour and Physiology*, 38(4), 225-236. doi:10.1080/10236240500310195
- Aquiloni, L., Martín, M. P., Gherardi, F., & Diéguez-Urbeondo, J. (2010). The North American crayfish *Procambarus clarkii* is the carrier of the oomycete *Aphanomyces astaci* in Italy. *Biological Invasions*, 13(2), 359-367. doi:10.1007/s10530-010-9828-2
- Aquiloni, L., Massolo, A., & Gherardi, F. (2009). Sex identification in female crayfish is bimodal. *Naturwissenschaften*, 96(1), 103-110. doi:10.1007/s00114-008-0458-9
- Arce, J. A., & Diéguez-Urbeondo, J. (2015). Structural damage caused by the invasive crayfish *Procambarus clarkii* (Girard, 1852) in rice fields of the Iberian Peninsula: a study case. *Fundamental and Applied Limnology*, 186(3), 259-269. doi:10.1127/fal/2015/0715
- Arcier, J. M., Herman, F., Lightner, D. V., Redman, R. M., Mari, J., & Bonami, J. R. (1999). A viral disease associated with mortalities in hatchery-reared postlarvae of the giant freshwater prawn *Macrobrachium rosenbergii*. *Diseases of Aquatic Organisms*, 38, 177-181. doi:10.3354/dao038177
- Arribas, R., Diaz-Paniagua, C., Caut, S., & Gomez-Mestre, I. (2015). Stable Isotopes Reveal Trophic Partitioning and Trophic Plasticity of a Larval Amphibian Guild. *PLoS One*, 10(6), e0130897. doi:10.1371/journal.pone.0130897
- Arribas, R., Díaz-Paniagua, C., & Gomez-Mestre, I. (2014). Ecological consequences of amphibian larvae and their native and alien predators on the community structure of temporary ponds. *Freshwater Biology*, 59(9), 1996-2008. doi:10.1111/fwb.12402
- Asih, A. Y. P., Irawan, B., & Soegianto, A. (2013). Effect of copper on survival, osmoregulation, and gill structures of freshwater prawn (*Macrobrachium rosenbergii*, de

- Man) at different development stages. *Marine and Freshwater Behaviour and Physiology*, 46(2), 75-88. doi:10.1080/10236244.2013.793471
- Atin, K. H., Christianus, A., Fatin, N., Lutas, A. C., Shabanimofrad, M., & Subha, B. (2017). Genetic diversity analysis in Malaysian giant prawns using expressed sequence tag microsatellite markers for stock improvement program. *Genet Mol Res*, 16(3). doi:10.4238/gmr16035685
- Augusto, A., Greene, L. J., Laure, H. J., & McNamara, J. C. (2007). Adaptive shifts in osmoregulatory strategy and the invasion of freshwater by brachyuran crabs: evidence from *Dilocarcinus pagei* (Trichodactylidae). *J Exp Zool A Ecol Genet Physiol*, 307(12), 688-698. doi:10.1002/jez.a.422
- Augusto, A., Greene, L. J., McNamara, J. C., & Laure, H. J. (2007). The Ontogeny of Isosmotic Intracellular Regulation in the Diadromous, Freshwater Palaemonid Shrimps, *Macrobrachium amazonicum* and *M. Olfersi* (Decapoda). *Journal of Crustacean Biology*, 27(4), 626-634. doi:10.1651/s-2796.1
- Augusto, A., & Masui, D. C. (2014). Sex and reproductive stage differences in the growth, metabolism, feed, fecal production, excretion and energy budget of the Amazon River prawn (*Macrobrachium amazonicum*). *Marine and Freshwater Behaviour and Physiology*, 47(6), 373-388. doi:10.1080/10236244.2014.942547
- Augusto, A., New, M. B., Santos, M. R., Amorim, R. V., & Valenti, W. C. (2020). Energy budget and physiology in early ontogenetic stages of the Amazon river prawn☆. *Aquaculture Reports*, 18. doi:10.1016/j.aqrep.2020.100446
- Augusto, A., & Valenti, W. C. (2016). Are there any physiological differences between the male morphotypes of the freshwater shrimp *Macrobrachium amazonicum* (Heller, 1862) (Caridea: Palaemonidae)? *Journal of Crustacean Biology*, 36(5), 716-723. doi:10.1163/1937240x-00002467
- Aya-Baquero, E., & Velasco-Santamaría, Y. (2013). Fecundidad y fertilidad de *Macrobrachium amazonicum* (Héller 1862) (Decápoda, Palaemonidae) del Piedemonte Llanero Colombiano. *Revista MVZ Córdoba*, 18(3), 3773-3780. doi:10.21897/rmvz.147
- Azzurro, E., & Cerri, J. (2021). Participatory mapping of invasive species: A demonstration in a coastal lagoon. *Marine Policy*, 126. doi:10.1016/j.marpol.2021.104412
- Bala, B., Mallik, M., Saclain, S., & Islam, M. S. (2017). Genetic variation in wild and hatchery populations of giant freshwater prawn (*Macrobrachium rosenbergii*) revealed by randomly amplified polymorphic DNA markers. *J Genet Eng Biotechnol*, 15(1), 23-30. doi:10.1016/j.jgeb.2017.02.006
- Banha, F., & Anastácio, P. M. (2011). Interactions between invasive crayfish and native river shrimp. *Knowledge and Management of Aquatic Ecosystems*, (401). doi:10.1051/kmae/2011033
- Banha, F., & Anastácio, P. M. (2013). Desiccation survival capacities of two invasive crayfish species. *Knowledge and Management of Aquatic Ecosystems*, (413). doi:10.1051/kmae/2013084

- Banha, F., & Anastácio, P. M. (2015). Live bait capture and crayfish trapping as potential vectors for freshwater invasive fauna. *Limnologica*, 51, 63-69. doi:10.1016/j.limno.2014.12.006
- Banha, F., Marques, M., & Anastácio, P. M. (2014). Dispersal of two freshwater invasive macroinvertebrates, *Procambarus clarkii* and *Physella acuta* by off-road vehicles. *Aquatic Conservation: Marine and Freshwater Ecosystems*, 24(5), 582-591. doi:10.1002/aqc.2453
- Barbaresi, S., Fani, R., Gherardi, F., Mengoni, A., & Souty-Grosset, C. (2003). Genetic variability in European populations of an invasive American crayfish: preliminary results. *Biological Invasions*, 5(3), 269-274. doi:10.1023/a:1026133519707
- Barbaresi, S., & Gherardi, F. (2006). Experimental Evidence for Homing in the Red Swamp Crayfish, *Procambarus clarkii*. *Bulletin Français de la Pêche et de la Pisciculture*, (380-381), 1145-1154. doi:10.1051/kmae:2006017
- Barbaresi, S., Tricarico, E., & Gherardi, F. (2004). Factors inducing the intense burrowing activity of the red-swamp crayfish, *Procambarus clarkii*, an invasive species. *Naturwissenschaften*, 91(7), 342-345. doi:10.1007/s00114-004-0533-9
- Barros-Alves, S. d. P., Almeida, A. C., Fransozo, V., Alves, D. F. R., Silva, J. C. d., & Cobo, V. J. (2012). Population biology of shrimp *Macrobrachium jelskii* (Miers, 1778) (Decapoda, Palaemonoidea) at the Grande River at northwest of the state of Minas Gerais, Brazil. *Acta Limnologica Brasiliensia*, 24(3), 266-275. doi:10.1590/s2179-975x2012005000044
- Bastos, A. M., Lima, J. F., & Tavares-Dias, M. (2018). Effect of increase in temperature on the survival and growth of *Macrobrachium amazonicum* (Palaemonidae) in the Amazon. *Aquatic Living Resources*, 31. doi:10.1051/alr/2018010
- Battisti, C., Fanelli, G., Bertolino, S., Luiselli, L., Amori, G., & Gippoliti, S. (2018). Non-native invasive species as paradoxical ecosystem services in urban conservation education. *Web Ecology*, 18(1), 37-40. doi:10.5194/we-18-37-2018
- Battisti, C., & Scalici, M. (2020). First records of the red swamp crayfish *Procambarus clarkii* (Girard, 1852) (Decapoda Cambaridae) from a small circum-Sardinian island (central Mediterranean Sea). *BioInvasions Records*, 9(2), 333-339. doi:10.3391/bir.2020.9.2.18
- Beitinger, T. L., & Huey, D. W. (1981). Acute toxicity of nitrite to crayfish *Procambarus simulans* in varied environmental conditions. *Environmental Pollution Series A, Ecological and Biological*, 26(4), 305-311. doi:10.1016/0143-1471(81)90052-0
- Belouard, N., Paillisson, J. M., Oger, A., Besnard, A. L., & Petit, E. J. (2019). Genetic drift during the spread phase of a biological invasion. *Mol Ecol*, 28(19), 4375-4387. doi:10.1111/mec.15238
- Bélouard, N., Petit, E. J., & Paillisson, J.-M. (2019). Variable effects of an invasive species on the reproduction and distribution of native species in pond networks. *Freshwater Biology*, 64(3), 544-554. doi:10.1111/fwb.13241



- Bentes, B., Martinelli-Lemos, J. M., Lutz, Í. A. F., Nascimento, M. S., & Isaac, V. J. (2016). Population dynamics of *Macrobrachium amazonicum* (Heller, 1862) (Decapoda: Palaemonidae) in a Brazilian Amazon estuary. *Pan-American Journal of Aquatic Sciences*, 11(1), 1-17.
- Bentes, B., Martinelli-Lemos, J. M., Paes, E. T., Fernandes, S. C. P., Paula, J. D., & Isaac, V. (2014). <b>Experimental study on the efficiency of different types of traps and baits for harvesting <i>Macrobrachium amazonicum</i> (Heller, 1862). *Acta Scientiarum. Biological Sciences*, 36(4). doi:10.4025/actascibiolsci.v36i4.22852
- Bentes, B. S., Martinelli, J. M., Souza, L. S., Cavalcante, D. V., Almeida, M. C., & Isaac, V. J. (2011). Spatial distribution of the amazon river prawn *Macrobrachium amazonicum* (Heller, 1862) (Decapoda, Caridea, Palaemonidae) in two perennial creeks of an estuary on the northern coast of Brazil (Guajará Bay, Belém, Pará). *Brazilian Journal of Biology*, 71(4), 925-935. doi:10.1590/s1519-69842011000500013
- Bernardo, J. M., Costa, A. M., Bruxelas, S., & Teixeira, A. (2011). Dispersal and coexistence of two non-native crayfish species (*Pacifastacus leniusculus* and *Procambarus clarkii*) in NE Portugal over a 10-year period. *Knowledge and Management of Aquatic Ecosystems*. doi:10.1051/kmae/2011047
- Cabral, J. A., Mieiro, C. L., & Marques, J. C. (1998). Environmental and biological factors influence the relationship between a predator fish, *Gambusia holbrooki*, and its main prey in rice fields of the Lower Mondego River Valley (Portugal). *Hydrobiologia*, 382(1/3), 41-51. doi:10.1023/a:1003480920168
- Cai, W., Ma, Z., Yang, C., Wang, L., Wang, W., Zhao, G., . . . Yu, D. W. (2017). Using eDNA to detect the distribution and density of invasive crayfish in the Honghe-Hani rice terrace World Heritage site. *PLoS One*, 12(5), e0177724. doi:10.1371/journal.pone.0177724
- Carvalho, A. P., Santos, P., & Fidalgo, M. L. (2001). Population Dynamics of the Red Swamp Crayfish, *Procambarus clarkii* (Girard, 1852) from the Aveiro Region, Portugal (Decapoda, Cambaridae). *Crustaceana*, 74(4), 369-375. doi:10.1163/156854001300104453
- Cecchinelli, E., Aquiloni, L., Maltagliati, G., Orioli, G., Tricarico, E., & Gherardi, F. (2012). Use of natural pyrethrum to control the red swamp crayfish *Procambarus clarkii* in a rural district of Italy. *Pest Manag Sci*, 68(6), 839-844. doi:10.1002/ps.2335
- Cesaroni, D., Allegrucci, G., & Sbordonì, V. (1992). A narrow hybrid zone between two crayfish species from a Mexican cave. *Journal of Evolutionary Biology*, 5(4), 643-659. doi:10.1046/j.1420-9101.1992.5040643.x
- Chadwick, D. D. A., Pritchard, E. G., Bradley, P., Sayer, C. D., Chadwick, M. A., Eagle, L. J. B., . . . Hong, S. (2020). A novel ‘triple drawdown’ method highlights deficiencies in invasive alien crayfish survey and control techniques. *Journal of Applied Ecology*, 58(2), 316-326. doi:10.1111/1365-2664.13758
- Chen, Q. H., Chen, W. J., & Guo, Z. L. (2018). Caridean prawn (Crustacea, Decapoda) from Dong'ao Island, Guangdong, China. *Zootaxa*, 4399(3), 315-328. doi:10.11646/zootaxa.4399.3.2

- Chen, R. T., Tsai, C. F., & Tzeng, W. N. (2009). Freshwater Prawns (*Macrobrachium* Bate, 1868) of Taiwan with Special References to Their Biogeographical Origins and Dispersion Routes. *Journal of Crustacean Biology*, 29(2), 232-244. doi:10.1651/08-3072.1
- Chen, W. J., Chen, Q. H., & Guo, Z. L. (2018). Caridean prawn (Crustacea, Decapoda) with description of a new species and an invasive crayfish from Yuelu mountain national park, Hunan, China. *Zootaxa*, 4472(3), 532-544. doi:10.11646/zootaxa.4472.3.6
- Cherry, D. S., Guthrie, R. K., Sherberger, F. F., & Larrick, S. R. (1979). The influence of coal ash and thermal discharges upon the distribution and bioaccumulation of aquatic invertebrates. *Hydrobiologia*, 62(3), 257-267. doi:10.1007/bf00043543
- Chi, S., Li, M., Zheng, J., Chen, S., Chen, M., Hu, J., . . . Zhao, X. (2017). Macroinvertebrate communities in the Big East Lake water network in relation to environmental factors. *Knowledge & Management of Aquatic Ecosystems*, (418). doi:10.1051/kmae/2017011
- Chiesa, S., Scalici, M., & Gibertin, G. (2006). Occurrence of Allochthonous Freshwater Crayfishes in Latium (Central Italy). *Bulletin Français de la Pêche et de la Pisciculture*, (380-381), 883-902. doi:10.1051/kmae:2006029
- Ching, C. A., & Velez, M. J. (1985). Mating, Incubation and Embryo Number in the Freshwater Prawn *Macrobrachium heterochirus* (Wiegmann, 1836) (Decapoda, Palaemonidae) Under Laboratory Conditions. *Crustaceana*, 49(1-3), 42-48. doi:10.1163/156854085x00198
- Choong, F. C., Bristow, G. A., Shaharom, F., Rashid, Z. A., & Kua, B. C. (2011). Probopyrus Buitendijki (Isopoda, Bopyridae), a Parasitic Isopod on *Macrobrachium rosenbergii* in Timun River, Negeri Sembilan, Malaysia. *Crustaceana*, 84(9), 1051-1059. doi:10.1163/001121611x586710
- Chucholl, C. (2011). Disjunct distribution pattern of *Procambarus clarkii* (Crustacea, Decapoda, Astacida, Cambaridae) in an artificial lake system in Southwestern Germany. *Aquatic Invasions*, 6(1), 109-113. doi:10.3391/ai.2011.6.1.14
- Chucholl, C. (2011). Population ecology of an alien “warm water” crayfish (*Procambarus clarkii*) in a new cold habitat. *Knowledge and Management of Aquatic Ecosystems*(401). doi:10.1051/kmae/2011053
- Chucholl, C. (2013). Feeding ecology and ecological impact of an alien ‘warm-water’ omnivore in cold lakes. *Limnologica*, 43(4), 219-229. doi:10.1016/j.limno.2012.10.001
- Chucholl, C. (2016). The bad and the super-bad: prioritising the threat of six invasive alien to three imperilled native crayfishes. *Biological Invasions*, 18(7), 1967-1988. doi:10.1007/s10530-016-1141-2
- Cilenti, L., Alfonso, G., Gargiulo, M., Chetta, F., Liparoto, A., D’Adamo, R., & Mancinelli, G. (2017). First records of the crayfish *Procambarus clarkii* (Girard, 1852) (Decapoda, Cambaridae) in Lake Varano and in the Salento Peninsula (Puglia region, SE Italy), with review of the current status in southern Italy. *BioInvasions Records*, 6(2), 153-158. doi:10.3391/bir.2017.6.2.11

- Cirujano, S., Camargo, J. A., & Gómez-Cordovés, C. (2004). Feeding Preference of the Red Swamp Crayfish *Procambarus clarkii* (Girard) on Living Macrophytes in a Spanish Wetland. *Journal of Freshwater Ecology*, 19(2), 219-226. doi:10.1080/02705060.2004.9664535
- Ciutti, F., Beltrami, M. E., Confortini, I., Cianfanelli, S., & Cappelletti, C. (2011). Non-indigenous invertebrates, fish and macrophytes in Lake Garda (Italy). *Journal of Limnology*, 70(2). doi:10.4081/jlimnol.2011.315
- Clark, W. H., & Lester, G. T. (2005). Range extension and ecological information for *Orconectes virilis* (Hagen 1870) (Decapoda: Cambaridae) in Idaho, USA. *Western North American Naturalist*, 65(2), 164-169.
- Clavero, M., Prenda, J., & Delibes, M. (2007). Does size matter? Relating consumed prey sizes and diet composition of otters in South Iberian coastal streams. *Acta Theriologica*, 52(1), 37-44. doi:10.1007/bf03194197
- Clusa, L., Miralles, L., Fernández, S., García-Vázquez, E., & Dopico, E. (2018). Public knowledge of alien species: a case study on aquatic biodiversity in North Iberian rivers. *Journal for Nature Conservation*, 42, 53-61. doi:10.1016/j.jnc.2018.01.001
- Coble, K. M., Hall, A. L., Meshes, C. C., Zalatan, J. A., Stanton, G. E., & Keller, T. A. (2015). Replacement of *Procambarus acutissimus* (Girard) by non-indigenous *Procambarus clarkii* (Girard) in a disturbed wetland. *Freshwater Crayfish*, 21(1), 153-157. doi:10.5869/fc.2015.v21-1.153
- Coignet, A., Pinet, F., & Souty-Grosset, C. (2012). Estimating population size of the red swamp crayfish (*Procambarus clarkii*) in fish-ponds (Brenne, Central France). *Knowledge and Management of Aquatic Ecosystems*, (406). doi:10.1051/kmae/2012019
- Coler, R. A., Watanabe, T., Xavier, B. F., & Paz, R. J. (1999). A preliminary report on the application of *Macrobrachium amazonicum* Heller, 1862 (Decapoda : Palaemonidae) as a biomarker. *Hydrobiologia*, 412, 119-121. doi:10.1023/a:1003864702924
- Collart, O. O. (1991). TUCURUI DAM AND THE POPULATIONS OF THE PRAWN *MACROBRACHIUM-AMAZONICUM* IN THE LOWER TOCANTINS (PA-BRAZIL) - A 4 YEAR STUDY. *Archiv Fur Hydrobiologie*, 122(2), 213-227.
- Collart, O. O., & Moreira, L. C. (1993). FISHERY POTENTIAL OF *MACROBRACHIUM-AMAZONICUM* IN CENTRAL AMAZONIA (CAREIRO ISLAND) - ABUNDANCE AND SIZE VARIATION. *Amazoniana-Limnologia Et Oecologia Regionalis Systemae Fluminis Amazonas*, 12(3-4), 399-413.
- Collins, P. (2000). A New Distribution Record for *Macrobrachium jelskii* (Miers, 1877) in Argentina (Decapoda, Palaemonidae). *Crustaceana*, 73(9), 1167-1169. doi:10.1163/156854000505065
- Collins, P. A., Giri, F., & Williner, V. (2009). Range extension for three species of South American freshwater crabs (Crustacea: Decapoda: Trichodactylidae). *Zootaxa*, 1977(1), 49-54. doi:10.11646/zootaxa.1977.1.4

- Collins, P. A., Giri, F., & Williner, V. (2011). Biogeography of the Freshwater Decapods in the La Plata Basin, South America. *Journal of Crustacean Biology*, 31(1), 179-191. doi:10.1651/10-3306.1
- Correia, A. M. (1998). Seasonal and Circadian Foraging Activity of *Procambarus clarkii* (Decapoda, Cambaridae) in Portugal. *Crustaceana*, 71(2), 158-166. doi:10.1163/156854098x00130
- Correia, A. M. (2001). Seasonal and interspecific evaluation of predation by mammals and birds on the introduced red swamp crayfish *Procambarus clarkii* (Crustacea, Cambaridae) in a freshwater marsh (Portugal). *Journal of Zoology*, 255, 533-541.
- Correia, A. M. (2002). Niche breadth and trophic diversity: feeding behaviour of the red swamp crayfish (*Procambarus clarkii*) towards environmental availability of aquatic macroinvertebrates in a rice field (Portugal). *Acta Oecologica*, 23(6), 421-429. doi:10.1016/s1146-609x(02)01166-9
- Correia, A. M. (2003). Food choice by the introduced crayfish *Procambarus clarkii*. *Annales Zoologici Fennici*, 40(6), 517-528.
- Correia, A. M., Bandeira, N., & Anastácio, P. M. (2005). Predator-prey interactions of *Procambarus clarkii* with aquatic macroinvertebrates in single and multiple prey systems. *Acta Oecologica*, 28(3), 337-343. doi:10.1016/j.actao.2005.06.002
- Correia, A. M., Bandeira, N., & Anastácio, P. M. (2007). Influence of chemical and visual stimuli in food-search behaviour of *Procambarus clarkii* under clear conditions. *Marine and Freshwater Behaviour and Physiology*, 40(3), 189-194. doi:10.1080/10236240701600725
- Correia, A. M., & Ferreira, O. (1995). Burrowing Behavior of the Introduced Red Swamp Crayfish *Procambarus clarkii* (Decapoda: Cambaridae) in Portugal. *Journal of Crustacean Biology*, 15(2). doi:10.2307/1548953
- Costa, B. N. S., Almeida, H. P., da Silva, B. C. P., de Figueiredo, L. G., de Oliveira, A. M., & Lima, M. O. (2020). *Macrobrachium amazonicum* (Crustacea, Decapoda) Used to Biomonitor Mercury Contamination in Rivers. *Arch Environ Contam Toxicol*, 78(2), 245-253. doi:10.1007/s00244-019-00683-0
- Costa, D. A. d. S., Martins, J. C., Silva, K. C. d. A., Klautau, A. G. C. d. M., & Cintra, I. H. A. (2016). Seletividade do matapi nas capturas de *Macrobrachium amazonicum* no baixo Rio Tocantins, Amazônia, Brasil. *Boletim Do Instituto De Pesca*, 42(2), 403-417. doi:10.20950/1678-2305.2016v42n2p403
- Costa e Silva, R., Cunha, M. C., Mossolin, E. C., & Jacobucci, G. B. (2019). Population structure of *Macrobrachium amazonicum* (Heller, 1862) (Decapoda: Palaemonidae) in Miranda Hydroelectric Plant Reservoir, Araguari river, Minas Gerais, Brazil. *Acta Limnologica Brasiliensia*, 31. doi:10.1590/s2179-975x4318
- Costa, T. V. d., Mattos, L. A. d., & Machado, N. d. J. B. (2016). Estrutura populacional de *Macrobrachium amazonicum* em dois lagos de várzea da Amazônia. *Boletim Do Instituto De Pesca*, 42(2), 281-293. doi:10.20950/1678-2305.2016v42n2p281

- Cruz, M. J., Pascoal, S., Tejedo, M., & Rebelo, R. (2006). Predation by an exotic crayfish, *Procambarus clarkii*, on Natterjack Toad, *Bufo calamita*, embryos: Its role on the exclusion of this amphibian from its breeding ponds. *Copeia*(2), 274-280.
- Cruz, M. J., & Rebelo, R. (2006). Colonization of freshwater habitats by an introduced crayfish, *Procambarus clarkii*, in Southwest Iberian Peninsula. *Hydrobiologia*, 575(1), 191-201. doi:10.1007/s10750-006-0376-9
- Cruz, M. J., Segurado, P., Sousa, M., & Rebelo, R. (2008). Collapse of the amphibian community of the paul do boquilobo natural reserve (central Portugal) after the arrival of the exotic american crayfish *Procambarus clarkii*. *Herpetological Journal*, 18(4), 197-204.
- da Silva, E. F., & Sant'Anna, B. S. (2019). Desiccation tolerance of two freshwater crabs of the Amazon: *Dilocarcinus pagei* and *Sylviocarcinus pictus* (Decapoda, Trichodactylidae). *Crustaceana*, 92(9), 1025-1037. doi:10.1163/15685403-00003933
- da Silva, F. R., Soares, T. P., de Quadros, M. L. A., Moreau, J. S., Castro, N. M. D., de Oliveira, L. C., . . . da Silva, F. N. L. (2020). Socioeconomics of fishermen from *Macrobrachium amazonicum* in Breves, Marajo archipelago, Brazil. *Brazilian Journal of Hygiene and Animal Sanity*, 14(4).
- da Silva, G. M. F., Pantoja Ferreira, M. A., von Ledebur, E. I. C. F., & da Rocha, R. M. (2009). Gonadal structure analysis of *Macrobrachium amazonicum* (Heller, 1862) from a wild population: a new insight into the morphotype characterization. *Aquaculture Research*, 40(7), 798-803. doi:10.1111/j.1365-2109.2009.02165.x
- Da Silva, R. R., Sampaio, C. M., & Santos, J. A. (2004). Fecundity and fertility of *Macrobrachium amazonicum* (Crustacea, Palaemonidae). *Braz J Biol*, 64(3A), 489-500. doi:10.1590/s1519-69842004000300012
- da Silva, T. E., Alves, D. F. R., Barros-Alves, S. d. P., Almeida, A. C., Taddei, F. G., & Fransozo, A. (2018). Morphometric differences between two exotic invasive freshwater caridean species (genus *Macrobrachium*). *Invertebrate Reproduction & Development*, 62(4), 221-228. doi:10.1080/07924259.2018.1505668
- Dalosto, M. M., Palaoro, A. V., Souty-Grosset, C., Bueno, S. L. d. S., Loureiro, T. G., Almerão, M. P., . . . Santos, S. (2015). One step ahead of the enemy: investigating aggressive interactions between invasive and native crayfish before the contact in nature. *Biological Invasions*, 17(12), 3503-3515. doi:10.1007/s10530-015-0974-4
- Dana, E. D., García-de-Lomas, J., González, R., & Ortega, F. (2011). Effectiveness of dam construction to contain the invasive crayfish *Procambarus clarkii* in a Mediterranean mountain stream. *Ecological Engineering*, 37(11), 1607-1613. doi:10.1016/j.ecoleng.2011.06.014
- Davanso, T. M., Simões, S. M., Fransozo, A., Caetano da Costa, R., & Taddei, F. G. (2013). Population dynamics of the freshwater crab *Dilocarcinus pagei* in tropical waters in southeastern Brazil. *Journal of Crustacean Biology*, 33(2), 235-243. doi:10.1163/1937240x-00002129

- Davanzo, T. M., Taddei, F. G., Hirose, G. L., & Costa, R. C. d. (2016). Sexual maturity, handedness and sexual dimorphism of the freshwater crab *Dilocarcinus pagei* in Southeastern Brazil. *Boletim Do Instituto De Pesca*, 42(2), 269-279. doi:10.20950/1678-2305.2016v42n2p269
- de Almeida, A. O., Coelho, P. A., Luz, J. R., dos Santos, J. T., & Ferraz, N. R. (2008). Decapod crustaceans in fresh waters of southeastern Bahia, Brazil. *Rev Biol Trop*, 56(3), 1225-1254. doi:10.15517/rbt.v56i3.5706
- de Andrade, K. S. F., Silva, L. V. C., & Pralon, B. G. N. (2020). First record of *Telothea henselii* (Isopoda: Cymothoidae) on *Macrobrachium jelskii* (Decapoda: Palaemonidae) from Brazil. *Pan-American Journal of Aquatic Sciences*, 15(2), 81-86.
- de Bruyn, M., Nugroho, E., Hossain, M. M., Wilson, J. C., & Mather, P. B. (2005). Phylogeographic evidence for the existence of an ancient biogeographic barrier: the Isthmus of Kra Seaway. *Heredity (Edinb)*, 94(3), 370-378. doi:10.1038/sj.hdy.6800613
- de Graaf, G., & Marttin, F. (2003). Mechanisms behind changes in fish biodiversity in the floodplains of Bangladesh. *Wetlands Ecology and Management*, 11(5), 273-280. doi:10.1023/b:Wetl.00000005539.40722.48
- De Lucena, I. C., Do Nascimento, W. M., Pinheiro, A. P., & Cascon, P. (2020). Ecological responses of two shrimp populations (Palaemonidae) to seasonal abiotic factor variations in a Brazilian semiarid reservoir. *Ethology Ecology & Evolution*, 32(5), 409-432. doi:10.1080/03949370.2020.1746404
- De Palma-Dow, A., Curti, J., & Fergus, E. (2020). It's a Trap! An evaluation of different passive trap types to effectively catch and control the invasive red swamp crayfish (*Procambarus clarkii*) in streams of the Santa Monica Mountains. *Management of Biological Invasions*, 11(1), 44-62. doi:10.3391/mbi.2020.11.1.04
- Deidun, A., Sciberras, A., Formosa, J., Zava, B., Insacco, G., Corsini-Foka, M., & Crandall, K. A. (2018). Invasion by non-indigenous freshwater decapods of Malta and Sicily, central Mediterranean Sea. *Journal of Crustacean Biology*, 38. doi:10.1093/jcbsiol/ruy076
- Del Ramo, J., Diaz-Mayans, J., Torreblanca, A., & Nunez, A. (1987). Effects of temperature on the acute toxicity of heavy metals (Cr, Cd, and Hg) to the freshwater crayfish, *Procambarus clarkii* (Girard). *Bull Environ Contam Toxicol*, 38(5), 736-741. doi:10.1007/BF01616694
- Desouky, M. M., Abdel-Gawad, H., & Hegazi, B. (2013). Distribution, fate and histopathological effects of ethion insecticide on selected organs of the crayfish, *Procambarus clarkii*. *Food Chem Toxicol*, 52, 42-52. doi:10.1016/j.fct.2012.10.029
- Devesa, V., Súnier, M. A., Lai, V. W. M., Granchinho, S. C. R., Martínez, J. M., Vélez, D., . . . Montoro, R. (2002). Determination of arsenic species in a freshwater crustacean *Procambarus clarkii*. *Applied Organometallic Chemistry*, 16(3), 123-132. doi:10.1002/aoc.269
- Diaz-Mayans, J., Torreblanca, A., Del Ramo, J., & Nunez, A. (1986). Oxygen uptake by excised gills of *Procambarus clarkii* (Girard) from Albufera Lake of Valencia, Spain,

- under heavy metal treatments. *Bull Environ Contam Toxicol*, 36(6), 912-917. doi:10.1007/BF01623604
- Díaz-Paniagua, C., Keller, C., Florencio, M., Andreu, A. C., Portheault, A., Gómez-Rodríguez, C., & Gomez-Mestre, I. (2014). Rainfall stochasticity controls the distribution of invasive crayfish and its impact on amphibian guilds in Mediterranean temporary waters. *Hydrobiologia*, 728(1), 89-101. doi:10.1007/s10750-014-1808-6
- Dies, J. I., Marín, J., & Pérez, C. (2005). Diet of Nesting Gull-billed Terns in Eastern Spain. *Waterbirds*, 28(1), 106-109. doi:10.1675/1524-4695(2005)028[0106:Dongti]2.0.Co;2
- Dies, J. I., Ramón, N., & Prosper, J. (2003). Winter Breeding by Black-crowned Night Heron in Eastern Spain. *Waterbirds*, 26(3), 379-382. doi:10.1675/1524-4695(2003)026[0379:Wbbbnh]2.0.Co;2
- Dissegna, A., Caputi, A., & Chiandetti, C. (2020). Long-lasting generalization triggered by a single trial event in the invasive crayfish *Procambarus clarkii*. *J Exp Biol*, 223(Pt 22). doi:10.1242/jeb.227827
- Domingos, I., Costa, J. L., & Costa, M. J. (2006). Factors determining length distribution and abundance of the European eel, *Anguilla anguilla*, in the River Mondego (Portugal). *Freshwater Biology*, 51(12), 2265-2281. doi:10.1111/j.1365-2427.2006.01656.x
- Donato, R., Rollandin, M., Favaro, L., Ferrarese, A., Pessani, D., & Ghia, D. (2018). Habitat use and population structure of the invasive red swamp crayfish *Procambarus clarkii* (Girard, 1852) in a protected area in northern Italy. *Knowledge & Management of Aquatic Ecosystems*, (419). doi:10.1051/kmae/2018002
- Dorn, N. J., Herring, G., & Gawlik, D. E. (2008). Estimation of Crayfish Abundance and Size-structure in Diets of White Ibis Chicks. *Waterbirds*, 31(3), 417-423. doi:10.1675/1524-4695-31.3.417
- Dörr, A. J. M., Elia, A. C., Rodolfi, M., Garzoli, L., Picco, A. M., D'Amen, M., & Scalici, M. (2012). A model of co-occurrence: segregation and aggregation patterns in the mycoflora of the crayfish *Procambarus clarkii* in Lake Trasimeno (central Italy). *Journal of Limnology*, 71(1). doi:10.4081/jlimnol.2012.e14
- Dörr, A. J. M., La Porta, G., Pedicillo, G., & Lorenzoni, M. (2006). Biology of *Procambarus clarkii* (Girard, 1852) in Lake Trasimeno. *Bulletin Français de la Pêche et de la Pisciculture*, (380-381), 1155-1168. doi:10.1051/kmae:2006018
- Dörr, A. J. M., Rodolfi, M., Elia, A. C., Scalici, M., Garzoli, L., & Picco, A. M. (2012). Mycoflora on the cuticle of the invasive crayfish *Procambarus clarkii*. *Fundamental and Applied Limnology*, 180(1), 77-84. doi:10.1127/1863-9135/2012/0175
- Dörr, A. J. M., & Scalici, M. (2013). Revisiting reproduction and population structure and dynamics of *Procambarus clarkii* eight years after its introduction into Lake Trasimeno (Central Italy). *Knowledge and Management of Aquatic Ecosystems*, (408). doi:10.1051/kmae/2013045

- Dörr, A. J. M., Scalici, M., Caldaroni, B., Magara, G., Scoparo, M., Goretti, E., & Elia, A. C. (2020). Salinity tolerance of the invasive red swamp crayfish *Procambarus clarkii* (Girard, 1852). *Hydrobiologia*, 847(9), 2065-2081. doi:10.1007/s10750-020-04231-z
- Dudgeon, D. (2006). The impacts of human disturbance on stream benthic invertebrates and their drift in North Sulawesi, Indonesia. *Freshwater Biology*, 51(9), 1710-1729. doi:10.1111/j.1365-2427.2006.01596.x
- Dunoyer, L., Dijoux, L., Bollache, L., & Lagrue, C. (2013). Effects of crayfish on leaf litter breakdown and shredder prey: are native and introduced species functionally redundant? *Biological Invasions*, 16(7), 1545-1555. doi:10.1007/s10530-013-0590-0
- Egly, R. M., Annis, G. M., Lindsay Chadderton, W., Peters, J. A., & Larson, E. R. (2019). Predicting the potential distribution of the non-native Red Swamp Crayfish *Procambarus clarkii* in the Laurentian Great Lakes. *Journal of Great Lakes Research*, 45(1), 150-159. doi:10.1016/j.jglr.2018.11.007
- Elmossalami, M. K., & Emara, M. T. (1999). Safety and quality of fresh water crayfish *Procambarus clarkii* in the river Nile. *Nahrung*, 43(2), 126-128. doi:10.1002/(SICI)1521-3803(19990301)43:2<126::AID-FOOD126>3.0.CO;2-O
- El-Shorbagy, H. M., & Hamdi, S. A. (2017). Implications of white spot syndrome virus disease on DNA integrity, histology and biochemistry of *Procambarus clarkii* in Egypt. *International Journal of Aquatic Biology*, 5(6), 375-386.
- Elvira, B. (1996). Pike and red swamp crayfish: a new case on predator-prey relationship between aliens in central Spain. *Journal of Fish Biology*, 48(3), 437-446. doi:10.1006/jfbi.1996.0043
- Escoriza, D. (2018). Patterns of occurrence of semi-aquatic reptiles in highly invaded Mediterranean rivers. *NeoBiota*, 38, 23-35. doi:10.3897/neobiota.38.23940
- Escribano, N., Oscoz, J., Galicia, D., Cancellario, T., Duran, C., Navarro, P., & Arino, A. H. (2018). Freshwater macroinvertebrate samples from a water quality monitoring network in the Iberian Peninsula. *Sci Data*, 5, 180108. doi:10.1038/sdata.2018.108
- Espina, S., Diaz Herrera, F., & Bückle R, L. F. (1993). Preferred and avoided temperatures in the crawfish *Procambarus clarkii* (Decapoda, Cambaridae). *Journal of Thermal Biology*, 18(1), 35-39. doi:10.1016/0306-4565(93)90039-v
- Faraone, F. P., Giacalone, G., Canale, D. E., D'Angelo, S., Favaccio, G., Garozzo, V., . . . Marrone, F. (2017). Tracking the invasion of the red swamp crayfish *Procambarus clarkii* (Girard, 1852) (Decapoda Cambaridae) in Sicily: a “citizen science” approach. *Biogeographia – The Journal of Integrative Biogeography*, 32(1). doi:10.21426/b632135512
- Faria, M., Huertas, D., Soto, D. X., Grimalt, J. O., Catalan, J., Riva, M. C., & Barata, C. (2010). Contaminant accumulation and multi-biomarker responses in field collected zebra mussels (*Dreissena polymorpha*) and crayfish (*Procambarus clarkii*), to evaluate toxicological effects of industrial hazardous dumps in the Ebro river (NE Spain). *Chemosphere*, 78(3), 232-240. doi:10.1016/j.chemosphere.2009.11.003



- Fernandes, L. S., Sant'Anna, B. S., & Hattori, G. Y. (2020). Amazon freshwater crab *Dilocarcinus pagei* (Decapoda: Trichodactylidae): a view about burrow construction behavior. *Latin American Journal of Aquatic Research*, 48(1), 85-93. doi:10.3856/vol48-issue1-fulltext-2325
- Fialho, C., Banha, F., & Anastácio, P. M. (2015). Factors determining active dispersal capacity of adult Chinese mitten crab *Eriocheir sinensis* (Decapoda, Varunidae). *Hydrobiologia*, 767(1), 321-331. doi:10.1007/s10750-015-2518-4
- Ficetola, G. F., Siesa, M. E., De Bernardi, F., & Padoa-Schioppa, E. (2012). Complex impact of an invasive crayfish on freshwater food webs. *Biodiversity and Conservation*, 21(10), 2641-2651. doi:10.1007/s10531-012-0323-1
- Fidalgo, M. L., Ferreira, C., & Sampaio, A. (2013). Assessment of the preferences of red swamp crayfish (*Procambarus clarkii*) fed with Riparian tree leaves: A microcosm study. *International Review of Hydrobiology*, 98(4), 183-190. doi:10.1002/iroh.201301536
- Figiel, C. R., & Miller, G. L. (1995). The Frequency of Chela Autotomy and Its Influence On the Growth and Survival of the Crayfish *Procambarus clarkii* (Girard, 1852) (Decapoda, Cambaridae). *Crustaceana*, 68(8), 472-483. doi:10.1163/156854095x01628
- Filipe, A. F., Quaglietta, L., Ferreira, M., Magalhães, M. F., & Beja, P. (2017). Geostatistical distribution modelling of two invasive crayfish across dendritic stream networks. *Biological Invasions*, 19(10), 2899-2912. doi:10.1007/s10530-017-1492-3
- Francesco Ficetola, G., Siesa, M. E., Manenti, R., Bottoni, L., De Bernardi, F., & Padoa-Schioppa, E. (2011). Early assessment of the impact of alien species: differential consequences of an invasive crayfish on adult and larval amphibians. *Diversity and Distributions*, 17(6), 1141-1151. doi:10.1111/j.1472-4642.2011.00797.x
- Freire, C. A., Souza-Bastos, L. R., Amado, E. M., Prodocimo, V., & Souza, M. M. (2013). Regulation of muscle hydration upon hypo- or hyper-osmotic shocks: differences related to invasion of the freshwater habitat by decapod crustaceans. *J Exp Zool A Ecol Genet Physiol*, 319(6), 297-309. doi:10.1002/jez.1793
- Freire, J. L., Bentes, B., Fontes, V. B., & da Silva, E. M. (2017). Morphometric discrimination among three stocks of *Macrobrachium amazonicum* in the Brazilian Amazon. *Limnologica*, 64, 1-10. doi:10.1016/j.limno.2017.01.007
- Freire, J. L., Marques, C. B., & Bentes, D. B. (2012). GROWTH AND STOCK ASSESSMENT OF *Macrobrachium amazonicum* (DECAPODA:PALAEMONIDAE) IN AN ESTUARY OF NORTHEAST PARA, BRASIL. *Boletim Do Instituto De Pesca*, 38(3), 215-229.
- Frusher, S. D. (1983). The ecology of juvenile penaeid prawns, mangrove crab ( *Scylla serrata*) and the giant freshwater prawn ( *Macrobrachium rosenbergii*) in the Purari Delta. *The Purari*, 341-353. doi:10.1007/978-94-009-7263-6\_18
- Frutiger, A., Borner, S., Busser, T., Eggen, R., Muller, R., Muller, S., & Wasmer, H. R. How to control unwanted populations of *Procambarus clarkii* in central Europe? 1998.

- Fryxell, D. C., Diluzio, A. R., Friedman, M. A., Menge, N. A., & Palkovacs, E. P. (2016). Cross-habitat effects shape the ecosystem consequences of co-invasion by a pelagic and a benthic consumer. *Oecologia*, 182(2), 519-528. doi:10.1007/s00442-016-3663-9
- Fujimoto, Y., Hoshi, M., & Jinguji, H. (2017). Examination of an effective trap to control North American invasive freshwater crayfish (*Procambarus clarkii*) in Japan. *Ecology and Civil Engineering*, 20(1), 1-10. doi:10.3825/ece.20.1
- Gago-Tinoco, A., Gonzalez-Dominguez, R., Garcia-Barrera, T., Blasco-Moreno, J., Bebianno, M. J., & Gomez-Ariza, J. L. (2014). Metabolic signatures associated with environmental pollution by metals in Donana National Park using *P. clarkii* as bioindicator. *Environ Sci Pollut Res Int*, 21(23), 13315-13323. doi:10.1007/s11356-014-2741-y
- García-de-Lomas, J., Dana, E. D., & González, R. (2020). Traps and netting, better together than alone: an innovative approach to improve *Procambarus clarkii* management. *Knowledge & Management of Aquatic Ecosystems*, (421). doi:10.1051/kmae/2020031
- Gazzola, A., Russo, G., Balestrieri, A., & Fusani, L. (2018). Embryonic and larval defensive responses of agile frog (*Rana dalmatina*) to alien crayfish. *Ethology*, 124(5), 347-356. doi:10.1111/eth.12737
- Geiger, W., Otero, M., & Alcorlo, P. (2004). Feeding Preferences and Food Selection of the Red Swamp Crayfish, *Procambarus clarkii*, in Habitats Differing in Food Item Diversity. *Crustaceana*, 77(4), 435-453. doi:10.1163/1568540041643283
- Gelder, S. R., Delmastro, G. B., & Ferraguti, M. (1994). A report on branchiobdellidans (Annelida: Clitellata) and a taxonomic key to the species in northern Italy, including the first record of *Cambarincola mesochoreus* on the introduced American red swamp crayfish. *Bolletino di zoologia*, 61(2), 179-183. doi:10.1080/11250009409355880
- Gherardi, F., & Acquistapace, P. (2007). Invasive crayfish in Europe: the impact of *Procambarus clarkii* on the littoral community of a Mediterranean lake. *Freshwater Biology*, 52(7), 1249-1259. doi:10.1111/j.1365-2427.2007.01760.x
- Gherardi, F., Barbaresi, S., & Salvi, G. (2000). Spatial and temporal patterns in the movement of *Procambarus clarkii*, an invasive crayfish. *Aquatic Sciences*, 62(2). doi:10.1007/s000270050006
- Gherardi, F., Coignet, A., Souty-Grosset, C., Spigoli, D., & Aquiloni, L. (2013). Climate warming and the agonistic behaviour of invasive crayfishes in Europe. *Freshwater Biology*, 58(9), 1958-1967. doi:10.1111/fwb.12183
- Gherardi, F., & Lazzara, L. (2006). Effects of the density of an invasive crayfish (*Procambarus clarkii*) on pelagic and surface microalgae in a Mediterranean wetland. *Archiv Fur Hydrobiologie*, 165(3), 401-414. doi:10.1127/0003-9136/2006/0165-0401
- Gherardi, F., Mavuti, K. M., Pacini, N. I. C., Tricarico, E., & Harper, D. M. (2011). The smell of danger: chemical recognition of fish predators by the invasive crayfish *Procambarus clarkii*. *Freshwater Biology*, 56(8), 1567-1578. doi:10.1111/j.1365-2427.2011.02595.x

- Gherardi, F., Raddi, A., Barbaresi, S., & Salvi, G. (2000). Life history patterns of the red swamp crayfish (*Procambarus clarkii*) in an irrigation ditch in Tuscany, Italy. *Crustacean Issues*, 12. doi:
- Gherardi, F., Renai, B., & Corti, C. (2001). Crayfish Predation on Tadpoles : A Comparison between a Native (*Austropotamobius Pallipes*) and an Alien Species (*Procambarus clarkii*). *Bulletin Français de la Pêche et de la Pisciculture*, (361), 659-668. doi:10.1051/kmae:2001011
- Gherardi, F., Robert Britton, J., Mavuti, K. M., Pacini, N., Grey, J., Tricarico, E., & Harper, D. M. (2011). A review of allodiversity in Lake Naivasha, Kenya: Developing conservation actions to protect East African lakes from the negative impacts of alien species. *Biological Conservation*, 144(11), 2585-2596. doi:10.1016/j.biocon.2011.07.020
- Gherardi, F., Tricarico, E., & Ilheu, M. (2002). Movement patterns of an invasive crayfish, *Procambarus clarkii*, in a temporary stream of southern Portugal. *Ethology Ecology & Evolution*, 14(3), 183-197.
- Gil-Sánchez, J. M., & Alba-Tercedor, J. (2002). Ecology of the native and introduced crayfishes *Austropotamobius pallipes* and *Procambarus clarkii* in southern Spain and implications for conservation of the native species. *Biological Conservation*, 105(1), 75-80. doi:10.1016/s0006-3207(01)00205-1
- Goldstein, A. H. (2016). A 20-year comparison of shrimp populations in the Opunohu Valley of Moorea, French Polynesia. *PeerJ PrePrints*.
- Gomez-Mestre, I., & Diaz-Paniagua, C. (2011). Invasive predatory crayfish do not trigger inducible defences in tadpoles. *Proc Biol Sci*, 278(1723), 3364-3370. doi:10.1098/rspb.2010.2762
- Gonçalves, V., Gherardi, F., & Rebelo, R. (2016). Modelling the predation effects of invasive crayfish, *Procambarus clarkii* (Girard, 1852), on invasive zebra mussel, *Dreissena polymorpha* (Pallas, 1771), under laboratory conditions. *Italian Journal of Zoology*, 83(1), 59-67. doi:10.1080/11250003.2016.1138558
- Gonçalves, V., Gherardi, F., & Rebelo, R. (2017). Bivalve or gastropod? Using profitability estimates to predict prey choice by *P. clarkii*. *acta ethologica*, 20(2), 107-117. doi:10.1007/s10211-017-0251-x
- Gonçalves, V., Rebelo, R., & Gherardi, F. (2013). Fouling of invasive red swamp crayfish, *Procambarus clarkii* (Girard, 1852) by the zebra mussel, *Dreissena polymorpha* (Pallas, 1771) in Lake Trasimeno, Italy. *Aquatic Invasions*, 8(1), 117-120. doi:10.3391/ai.2013.8.1.14
- Graham, Z. A., & Angilletta, M. J. (2020). Claw size predicts dominance within and between invasive species of crayfish. *Animal Behaviour*, 166, 153-161. doi:10.1016/j.anbehav.2020.06.021
- Green, N., Bentley, M., Stebbing, P., Andreou, D., & Britton, R. (2018). Trapping for invasive crayfish: comparisons of efficacy and selectivity of baited traps versus novel artificial refuge traps. *Knowledge & Management of Aquatic Ecosystems*, (419). doi:10.1051/kmae/2018007

- Grey, J., & Jackson, M. C. (2012). 'Leaves and eats shoots': direct terrestrial feeding can supplement invasive red swamp crayfish in times of need. *PLoS One*, 7(8), e42575. doi:10.1371/journal.pone.0042575
- Grillas, C., Ugnon-Coussioz, E., Priol, P., & Renet, J. (2018). Low occurrence of the great crested newt *Triturus cristatus* at the limits of its range: An alarming preliminary study. *Herpetological Bulletin*(145), 14-18.
- Guerra, A. L., Lima, A. V., Lucato Junior, R. V., Chiachio, M. C., Taddei, F. G., & Castiglioni, L. (2014). Genetic variability and phylogenetic aspects in species of the genus *Macrobrachium*. *Genet Mol Res*, 13(2), 3646-3655. doi:10.4238/2014.May.9.7
- Guerra, A. L., Lima, A. V., Taddei, F. G., & Castiglioni, L. (2010). Genetic polymorphism, molecular characterization and relatedness of *Macrobrachium* species (Palaemonidae) based on RAPD-PCR. *Genet Mol Res*, 9(4), 2317-2327. doi:10.4238/vol9-4gmr935
- Gutierrez-Yurrita, P. J., Ilheu, M., Montes, C., & Bernardo, J. Morphometrics of red swamp crayfish from a temporary Marsh (Donana National Park, Sw. Spain) and a temporary stream (Pardiela Stream, S. Portugal) 1997.
- Gutierrez-Yurrita, P. J., Marin-Garcia, L., & Montes, C. (2015). ECOLOGICAL DESIGN OF A CRAYFISHING PROGRAM TO CONTROL POPULATION DENSITY OF THE INVASIVE SPECIES *PROCAMBARUS CLARKII* IN DONANA NATIONAL PARK FRESHWATER MARSH (SPAIN). *Applied Ecology and Environmental Research*, 13(2), 513-533.
- Gutierrez-Yurrita, P. J., & Montes, C. (2001). Bioenergetics of juveniles of red swamp crayfish (*Procambarus clarkii*). *Comp Biochem Physiol A Mol Integr Physiol*, 130(1),
- Gutiérrez-Yurrita, P. J., & Montes, C. (1999). Bioenergetics and phenology of reproduction of the introduced red swamp crayfish, *Procambarus clarkii* , in Do-ana National Park, Spain, and implications for species management. *Freshwater Biology*, 42(3), 561-574. doi:10.1046/j.1365-2427.1999.00484.x
- Gutiérrez-Yurrita, P. J., Sancho, G., Bravo, M. Á., Baltanás, Á., Montes, C., Gutierrez-Yurrita, P. J., . . . Baltanas, A. (1998). Diet of the Red Swamp Crayfish *Procambarus clarkii* in Natural Ecosystems of the Doñana National Park Temporary Fresh-Water Marsh (Spain). *Journal of Crustacean Biology*, 18(1). doi:10.2307/1549526
- Hamasaki, K., Osabe, N., Nishimoto, S., Dan, S., & Kitada, S. (2020). Sexual Dimorphism and Reproductive Status of the Red Swamp Crayfish *Procambarus clarkii*. *Zool Stud*, 59, e7. doi:10.6620/ZS.2020.59-07
- Hang, D. R., You, B. R., Huang, Y. X., Mei, Q. F., Jing, S. B., & Hu, H.-g. (2015). [Preliminary study of toxicity of niclosamide ethanolamine salt on wetland creatures along lower reaches of Yangtze River in Nanjing City]. *Zhongguo Xue Xi Chong Bing Fang Zhi Za Zhi*, 27(5), 467-469, 509.
- Hanshew, B. A., & Garcia, T. S. (2012). Invasion of the shelter snatchers: behavioural plasticity in invasive red swamp crayfish, *Procambarus clarkii*. *Freshwater Biology*, 57(11), 2285-2296. doi:10.1111/fwb.12002

- Harper, D., & Mavuti, K. (2004). Lake Naivasha, Kenya: Ecohydrology to guide the management of a tropical protected area. *Ecohydrology and Hydrobiology*, 4(3), 287-305.
- Harper, D. M. (2002). Distribution and abundance of the Louisiana red swamp crayfish *Procambarus clarkii* Girard at Lake Naivasha, Kenya between 1987 and 1999. *Hydrobiologia*, 488(1/3), 143-151. doi:10.1023/a:1023330614984
- Harper, D. M., Mavuti, K. M., & Muchiri, S. M. (2009). Ecology and Management of Lake Naivasha, Kenya, in Relation to Climatic Change, Alien Species' Introductions, and Agricultural Development. *Environmental Conservation*, 17(4), 328-336. doi:10.1017/s037689290003277x
- Haubrock, P. (2019). Predicting the effects of reintroducing a native predator (European eel, *Anguilla anguilla*) into a freshwater community dominated by alien species using a multidisciplinary approach. *Management of Biological Invasions*, 10(1), 171-191. doi:10.3391/mbi.2019.10.1.11
- Haubrock, P., Balzani, P., Johovic, I., Inghilesi, A., Nocita, A., & Tricarico, E. (2018). The diet of the alien channel catfish *Ictalurus punctatus* in the River Arno (Central Italy). *Aquatic Invasions*, 13(4), 575-585. doi:10.3391/ai.2018.13.4.14
- Haubrock, P. J., Balzani, P., Azzini, M., Inghilesi, A. F., Veselý, L., Guo, W., & Tricarico, E. (2019). Shared Histories of Co-evolution May Affect Trophic Interactions in a Freshwater Community Dominated by Alien Species. *Frontiers in Ecology and Evolution*, 7. doi:10.3389/fevo.2019.00355
- Haubrock, P. J., Criado, A., Monteoliva, A. P., Monteoliva, J. A., Santiago, T., Inghilesi, A. F., & Tricarico, E. (2018). Control and eradication efforts of aquatic alien fish species in Lake Caicedo Yuso-Arreo. *Management of Biological Invasions*, 9(3), 267-267-278.
- Haubrock, P. J., Inghilesi, A. F., Mazza, G., Bendoni, M., Solari, L., & Tricarico, E. (2019). Burrowing activity of *Procambarus clarkii* on levees: analysing behaviour and burrow structure. *Wetlands Ecology and Management*, 27(4), 497-511. doi:10.1007/s11273-019-09674-3
- Hayd, L., & Anger, K. (2013). Reproductive and morphometric traits of *Macrobrachium amazonicum* (Decapoda: Palaemonidae) from the Pantanal, Brazil, suggests initial speciation. *Rev Biol Trop*, 61(1), 39-57. doi:10.15517/rbt.v61i1.10881
- Hayd, L. A. H., Anger, K., & Urzua, A. (2017). Growth, elemental and proximate biochemical composition of larval Amazon River prawn, *Macrobrachium amazonicum*, reared under different salinity conditions. *Latin American Journal of Aquatic Research*, 45(5), 983-991. doi:10.3856/vol45-issue5-fulltext-14
- Hazlett, B. A., Acquistapace, P., & Gherardi, F. (2002). Differences in Memory Capabilities in Invasive and Native Crayfish. *Journal of Crustacean Biology*, 22(2), 439-448. doi:10.1651/0278-0372(2002)022[0439:Dimcii]2.0.Co;2
- Heikal, M. N., Sanad, M., Shamseldean, M. S. M., & Hamdi, S. A. (2018). The red swamp crayfish, *Procambarus clarkii* (Gerard, 1852) an invasive species in Egypt as a biocontrol

- agent of the mosquito, *Culex quinquefasciatus* Say, 1823. *Bioscience Research*, 15(2), 839-849.
- Henriques, J. F., Tavares, P. C., Correia-dos-Santos, M. M., Trancoso, M. A., Santos-Reis, M., & Branquinho, C. (2014). Monitoring Hg and Cd Contamination Using Red Swamp Crayfish (*Procambarus clarkii*): Implications for Wetland Food Chain Contamination. *Water, Air, & Soil Pollution*, 225(12). doi:10.1007/s11270-014-2210-8
- Henry-Silva, G. G., Camargo, A. F. M., Pontes, C. S., & Miyase, L. K. (2010). Características limnológicas da coluna d'água e dos efluentes de viveiros de criação de camarões-da-amazônia. *Revista Brasileira de Zootecnia*, 39(10), 2099-2107. doi:10.1590/s1516-35982010001000001
- Henry-Silva, G. G., Maia, C. S. P., Moura, R. S. T., Bessa Junior, A. P., & Valenti, W. C. (2015). Integrated multi-trophic culture of Nile tilapia (*Oreochromis niloticus*) and Amazon river prawn (*Macrobrachium amazonicum*) in brackish water. *Arquivo Brasileiro de Medicina Veterinária e Zootecnia*, 67(1), 265-273. doi:10.1590/1678-6788
- Hernández, L., Maeda-Martínez, A. M., Ruiz-Campos, G., Rodríguez-Almaraz, G., Alonzo-Rojo, F., & Sainz, J. C. (2007). Geographic expansion of the invasive red crayfish *Procambarus clarkii* (Girard, 1852) (Crustacea: Decapoda) in Mexico. *Biological Invasions*, 10(7), 977-984. doi:10.1007/s10530-007-9175-0
- Herrera, D. R., Davanso, T. M., Costa, R. C., & Taddei, F. G. (2013). The relative growth and sexual maturity of the freshwater crab *Dilocarcinus pagei* (Brachyura, Trichodactylidae) in the northwestern region of the state of São Paulo. *Iheringia. Série Zoologia*, 103(3), 232-239. doi:10.1590/s0073-47212013000300004
- Hofkin, B. V., Koech, D. K., Oumaj, J., & Loker, E. S. (1991). The North American crayfish *Procambarus clarkii* and the biological control of schistosome-transmitting snails in Kenya: Laboratory and field investigations. *Biological Control*, 1(3), 183-187. doi:10.1016/1049-9644(91)90065-8
- Hofkin, B. V., Mkoji, G. M., Koech, D. K., & Loker, E. S. (1991). Control of schistosome-transmitting snails in Kenya by the North American crayfish *Procambarus clarkii*. *Am J Trop Med Hyg*, 45(3), 339-344. doi:10.4269/ajtmh.1991.45.339
- Hossain, M. S., & Das, N. G. (2010). GIS-based multi-criteria evaluation to land suitability modelling for giant prawn (*Macrobrachium rosenbergii*) farming in Companigonj Upazila of Noakhali, Bangladesh. *Computers and Electronics in Agriculture*, 70(1), 172-186. doi:10.1016/j.compag.2009.10.003
- Hothem, R. L., Bergen, D. R., Bauer, M. L., Crayon, J. J., & Meckstroth, A. M. (2007). Mercury and trace elements in crayfish from northern California. *Bull Environ Contam Toxicol*, 79(6), 628-632. doi:10.1007/s00128-007-9304-6
- Hu, N., Liu, C., Chen, Q., & Zhu, L. (2021). Life cycle environmental impact assessment of rice-crayfish integrated system: A case study. *Journal of Cleaner Production*, 280. doi:10.1016/j.jclepro.2020.124440

- Huang, J., Tang, S., Cai, F., Lin, Y., & Wu, Z. (2017). Microsatellite evidence of dispersal mechanism of red swamp crayfish (*Procambarus clarkii*) in the Pearl River basin and implications for its management. *Sci Rep*, 7(1), 8272. doi:10.1038/s41598-017-08552-3
- Hurwood, D. A., Dammannagoda, S., Krosch, M. N., Jung, H., Salin, K. R., Youssef, M. A. B. H., . . . Mather, P. B. (2014). Impacts of climatic factors on evolution of molecular diversity and the natural distribution of wild stocks of the giant freshwater prawn (*Macrobrachium rosenbergii*). *Freshwater Science*, 33(1), 217-231. doi:10.1086/675243
- Ibrahim, A. M., Khalil, M. T., & Mubarak, M. F. (1997). Ecological studies on the exotic crayfishes, *Procambarus clarkii* and *Procambarus zonangulus* in the River Nile, Egypt. *International Journal of Ecology and Environmental Sciences*, 23(3), 217-228.
- Iketani, G., Aviz, M., Maciel, C., Valenti, W., Schneider, H., & Sampaio, I. (2016). Successful invasion of the Amazon Coast by the giant river prawn, *Macrobrachium rosenbergii*: evidence of a reproductively viable population. *Aquatic Invasions*, 11(3), 277-286. doi:10.3391/ai.2016.11.3.06
- Iketani, G., Pimentel, L., Silva-Oliveira, G., Maciel, C., Valenti, W., Schneider, H., & Sampaio, I. (2011). The history of the introduction of the giant river prawn, *Macrobrachium cf. rosenbergii* (Decapoda, Palaemonidae), in Brazil: New insights from molecular data. *Genet Mol Biol*, 34(1), 142-151. doi:10.1590/S1415-47572010005000115
- Ilhéu, M., Acquistapace, P., Benvenuto, C., & Gherardi, F. (2003). Shelter use of the Red-Swamp Crayfish (*Procambarus clarkii*) in dry-season stream pools. *Archiv Fur Hydrobiologie*, 157(4), 535-546. doi:10.1127/0003-9136/2003/0157-0535
- J. Cruz, M., Rebelo, R., & G. Crespo, E. (2006). Effects of an introduced crayfish, *Procambarus clarkii*, on the distribution of south-western Iberian amphibians in their breeding habitats. *Ecography*, 29(3), 329-338. doi:10.1111/j.2006.0906-7590.04333.x
- Jackson, M. C., Donohue, I., Jackson, A. L., Britton, J. R., Harper, D. M., & Grey, J. (2012). Population-level metrics of trophic structure based on stable isotopes and their application to invasion ecology. *PLoS One*, 7(2), e31757. doi:10.1371/journal.pone.0031757
- Jackson, M. C., Evangelista, C., Zhao, T., Lecerf, A., Britton, J. R., & Cucherousset, J. (2017). Between-lake variation in the trophic ecology of an invasive crayfish. *Freshwater Biology*, 62(9), 1501-1510. doi:10.1111/fwb.12957
- Jackson, M. C., Grey, J., Miller, K., Britton, J. R., & Donohue, I. (2016). Dietary niche constriction when invaders meet natives: evidence from freshwater decapods. *J Anim Ecol*, 85(4), 1098-1107. doi:10.1111/1365-2656.12533
- Jackson, M. C., Jones, T., Milligan, M., Sheath, D., Taylor, J., Ellis, A., . . . Grey, J. (2014). Niche differentiation among invasive crayfish and their impacts on ecosystem structure and functioning. *Freshwater Biology*, 59(6), 1123-1135. doi:10.1111/fwb.12333
- Jancowski, K., & Orchard, S. (2013). Stomach contents from invasive American bullfrogs *Rana catesbeiana* (= *Lithobates catesbeianus*) on southern Vancouver Island, British Columbia, Canada. *NeoBiota*, 16, 17-37. doi:10.3897/neobiota.16.3806

- Jayasree, L., Janakiram, P., & Madhavi, R. (2010). Epibionts and parasites of *Macrobrachium rosenbergii* and *Metapenaeus dobsoni* from Gosthani estuary. *Journal of Natural History*, 35(2), 157-167. doi:10.1080/00222930150215297
- Jin, S., Jacquin, L., Xiong, M., Li, R., Lek, S., Li, W., & Zhang, T. (2019). Reproductive pattern and population dynamics of commercial red swamp crayfish (*Procambarus clarkii*) from China: implications for sustainable aquaculture management. *PeerJ*, 7, e6214. doi:10.7717/peerj.6214
- Joaquín Gutiérrez-Yurrita, P., & Montes, C. (1998). Environmental factors controlling crayfish *Procambarus clarkii* activity in the Donana National Park freshwater marsh (SW-Spain). *Comparative Biochemistry and Physiology - A Molecular and Integrative Physiology*, 120(4), 713-721. doi:10.1016/S1095-6433(98)10091-0
- Johnson, B. L., Willacker, J. J., Eagles-Smith, C. A., Pearl, C. A., & Adams, M. J. (2014). Invasive crayfish as vectors of mercury in freshwater food webs of the Pacific Northwest. *Environ Toxicol Chem*, 33(11), 2639-2645. doi:10.1002/etc.2727
- Johović, I., Verrucchi, C., Inghilesi, A. F., Scapini, F., & Tricarico, E. (2019). Managing the invasive crayfish *Procambarus clarkii* : Is manual sterilisation the solution? *Freshwater Biology*, 65(4), 621-631. doi:10.1111/fwb.13450
- Kain, M. P., & McCoy, M. W. (2016). Anti-predator behavioral variation among *Physa acuta* in response to temporally fluctuating predation risk by *Procambarus*. *Behav Processes*, 133. doi:10.1016/j.beproc.2016.10.011
- Kang, S.-R., & King, S. L. (2012). Influence of salinity and prey presence on the survival of aquatic macroinvertebrates of a freshwater marsh. *Aquatic Ecology*, 46(4), 411-420. doi:10.1007/s10452-012-9410-3
- Kasuya, E., Tsurumaki, S., & Kanie, M. (1996). Reversal of Sex Roles in the Copulatory Behavior of the Imported Crayfish *Procambarus clarkii*. *Journal of Crustacean Biology*, 16(3). doi:10.2307/1548736
- Kato, N., & Miyashita, T. (2003). Sexual difference in modes of selection on the pleopods of crayfish (Decapoda: Astacoidea) revealed by the allometry of developmentally homologous traits. *Canadian Journal of Zoology*, 81(6), 971-978. doi:10.1139/z03-083
- Kato, N., & Miyashita, T. (2005). Exploring the mechanisms causing a high allometric value of female pleopod in the crayfish *Procambarus clarkii*. *Zoolog Sci*, 22(7), 717-721. doi:10.2108/zsj.22.717
- Kendrick, M. R., & Huryn, A. D. (2015). Ephemeral wetlands as significant habitat for threatened crayfish in Alabama, USA. *Freshwater Crayfish*, 21(1), 147-152. doi:10.5869/fc.2015.v21-1.147
- Keppeler, E. C., Moraes Valenti, P. M. C., & Pereira, L. V. (2012). Temporal variation in the water quality of ponds and effluent of grow-out ponds of Amazon River prawn *Macrobrachium amazonicum*. *Revista Peruana de Biología*, 19(3), 299-306.



- Kerby, J. L., Riley, S. P. D., Kats, L. B., & Wilson, P. (2005). Barriers and flow as limiting factors in the spread of an invasive crayfish (*Procambarus clarkii*) in southern California streams. *Biological Conservation*, 126(3), 402-409. doi:10.1016/j.biocon.2005.06.020
- Klose, K. (2011). Snail responses to cues produced by an invasive decapod predator. *Invertebrate Biology*, 130(3), 226-235. doi:10.1111/j.1744-7410.2011.00232.x
- Klose, K., & Cooper, S. D. (2012). Contrasting effects of an invasive crayfish (*Procambarus clarkii*) on two temperate stream communities. *Freshwater Biology*, 57(3), 526-540. doi:10.1111/j.1365-2427.2011.02721.x
- Klose, K., & Cooper, S. D. (2013). Complex impacts of an invasive omnivore and native consumers on stream communities in California and Hawaii. *Oecologia*, 171(4), 945-960. doi:10.1007/s00442-012-2449-y
- Kobayashi, R., Maezono, Y., & Miyashita, T. (2011). The importance of allochthonous litter input on the biomass of an alien crayfish in farm ponds. *Population Ecology*, 53(4), 525-534. doi:10.1007/s10144-011-0268-3
- Kuguru, B. (2019). First record of giant freshwater prawn *Macrobrachium rosenbergii* (de Man, 1879) from small-scale fisheries in East Africa, confirmed with DNA barcoding. *BioInvasions Records*, 8(2), 379-391. doi:10.3391/bir.2019.8.2.19
- Kuklina, I., Kouba, A., Buric, M., Horka, I., Duris, Z., & Kozak, P. (2014). Accumulation of heavy metals in crayfish and fish from selected Czech reservoirs. *Biomed Res Int*, 2014, 306103. doi:10.1155/2014/306103
- Lang, I., Evangelista, C., Everts, R. M., Loot, G., & Cucherousset, J. (2020). Stable resource polymorphism along the benthic littoral-pelagic axis in an invasive crayfish. *Ecol Evol*, 10(5), 2650-2660. doi:10.1002/ece3.6095
- Larson, E. (2008). Do schools and golf courses represent emerging pathways for crayfish invasions? *Aquatic Invasions*, 3(4), 465-468. doi:10.3391/ai.2008.3.4.18
- Larson, E. R., & Olden, J. D. (2011). The State of Crayfish in the Pacific Northwest. *Fisheries*, 36(2), 60-73. doi:10.1577/03632415.2011.10389069
- Larson, E. R., Twardochleb, L. A., & Olden, J. D. (2016). Comparison of trophic function between the globally invasive crayfishes *Pacifastacus leniusculus* and *Procambarus clarkii*. *Limnology*, 18(3), 275-286. doi:10.1007/s10201-016-0505-8
- Le Gall, J.-Y., & Beague, E. (1986). Introduction du camaron *Macrobrachium rosenbergii* (de Man) (Crustacea, Decapoda, Caridea, Palaemonidae) a l'île de la Reunion (Ocean Indien). *Aquaculture*, 52(4), 303-305. doi:10.1016/0044-8486(86)90372-8
- Leite, E. P., Anastácio, P. M., Ferreira, M., Vicente, L., & Correia, A. M. (2005). Do eastern mosquitofish exhibit anti-predator behavior towards red swamp crayfish? *Zoological Studies*, 44(4), 513-518.
- Lekuona, J. M. (2018). Geographical and seasonal variations in the diet of the bittern *Botaurus stellaris* in the Ebro valley. *Revista Catalana d'Ornitologia*, 34(1), 1-10. doi:10.2436/20.8100.01.1

- Lerat, D., Paris, L., & Baran, P. (2006). Statut De L'Écrevisse À Pattes Blanches (*Austropotamobius Pallipes* Lereboullet, 1858) En Bourgogne : Bilan De 5 Années De Prospection. *Bulletin Français de la Pêche et de la Pisciculture*, (380-381), 867-882. doi:10.1051/kmae:2006028
- Levri, E. (2019). Predator detection and a possible dispersal behavior of the invasive New Zealand mud snail, *Potamopyrgus antipodarum* (Gray, 1843). *Aquatic Invasions*, 14(3), 417-432. doi:10.3391/ai.2019.14.3.02
- Li, K., He, C., Zhuang, J., Zhang, Z., Xiang, H., Wang, Z., . . . Sheng, L. (2014). Long-Term Changes in the Water Quality and Macroinvertebrate Communities of a Subtropical River in South China. *Water*, 7(12), 63-80. doi:10.3390/w7010063
- Li, Y., Guo, X., Cao, X., Deng, W., Luo, W., & Wang, W. (2012). Population genetic structure and post-establishment dispersal patterns of the red swamp crayfish *Procambarus clarkii* in China. *PLoS One*, 7(7), e40652. doi:10.1371/journal.pone.0040652
- Li, Y., Guo, X., Chen, L., Bai, X., Wei, X., Zhou, X., . . . Wang, W. (2015). Inferring Invasion History of Red Swamp Crayfish (*Procambarus clarkii*) in China from Mitochondrial Control Region and Nuclear Intron Sequences. *Int J Mol Sci*, 16(7), 14623-14639. doi:10.3390/ijms160714623
- Lianos, L., Mollemberg, M., Rodrigues, L. A., Vetorelli, M. P., & Santana, W. (2018). Checklist of the species of *Macrobrachium* Spence Bate, 1868 (Decapoda: Caridea: Palaemonidae) from the lower Parnaíba River basin, Piauí, Brazil. *Nauplius*, 26(0). doi:10.1590/2358-2936e2018017
- Ligas, A. (2008). Population Dynamics of *Procambarus clarkii* (Girard, 1852) (Decapoda, Astacidea, Cambaridae) from Southern Tuscany (Italy). *Crustaceana*, 81(5), 601-609. doi:10.1163/156854008784092229
- Lima, J. d. F., Silva, L. M. A. d., Silva, T. C. d., Garcia, J. d. S., Pereira, I. d. S., & Amaral, K. D. S. (2014). Reproductive aspects of *Macrobrachium amazonicum* (Decapoda: Palaemonidae) in the State of Amapá, Amazon River mouth. *Acta Amazonica*, 44(2), 245-254. doi:10.1590/s0044-59672014000200010
- Lima, J. d. F., Silva, T. C. d., Silva, L. M. A. d., & Garcia, J. d. S. (2013). Brachyuran crustaceans from the bycatch of prawn fisheries at the mouth of the Amazon river. *Acta Amazonica*, 43(1), 91-98. doi:10.1590/s0044-59672013000100011
- Lipej, L., Acevedo, I., Akel, E. H. K., Anastasopoulou, A., Angelidis, A., Azzurro, E., . . . Zava, B. (2017). "New Mediterranean Biodiversity Records" (March 2017). *Mediterranean Marine Science*, 18(1). doi:10.12681/mms.2068
- Liu, F., Qu, Y.-K., Geng, C., Wang, A.-M., Zhang, J.-H., Li, J.-F., . . . Yu, Y.-B. (2020). Analysis of the population structure and genetic diversity of the red swamp crayfish (*Procambarus clarkii*) in China using SSR markers. *Electronic Journal of Biotechnology*, 47, 59-71. doi:10.1016/j.ejbt.2020.06.007
- Liu, G., & Zhou, L. (2017). Population genetic structure and molecular diversity of the red swamp crayfish in China based on mtDNA COI gene sequences. *Mitochondrial DNA A DNA Mapp Seq Anal*, 28(6), 860-866. doi:10.1080/24701394.2016.1199022

- Liu, G., Zhou, L., Li, X., & Lu, D. (2013). Population genetic structure of the invasive red swamp crayfish in China revealed by ITS1 variation. *Biochem Genet*, 51(11-12), 841-852. doi:10.1007/s10528-013-9611-z
- 10.1007/s10528-013-9611-z. Epub 2013 Jul 4.
- Liu, X., Wang, S., Ke, Z., Cheng, C., Wang, Y., Zhang, F., . . . Li, Y. (2018). More invaders do not result in heavier impacts: The effects of non-native bullfrogs on native anurans are mitigated by high densities of non-native crayfish. *J Anim Ecol*, 87(3), 850-862. doi:10.1111/1365-2656.12793
- Loebmann, D., Mai, A. C. G., & Lee, J. T. (2010). The invasion of five alien species in the Delta do Parnaíba Environmental Protection Area, Northeastern Brazil. *Revista De Biologia Tropical*, 58(3), 909-923.
- Loureiro, T. G., Anastácio, P. M., Bueno, S. L. d. S., Wood, C. T., & Araujo, P. B. (2019). Food matters: Trophodynamics and the role of diet in the invasion success of *Procambarus clarkii* in an Atlantic Forest conservation area. *Limnologia*, 79. doi:10.1016/j.limno.2019.125717
- Loureiro, T. G., Anastacio, P. M., Bueno, S. L. S., & Araujo, P. B. (2018). Management of invasive populations of the freshwater crayfish *Procambarus clarkii* (Decapoda, Cambaridae): test of a population-control method and proposal of a standard monitoring approach. *Environ Monit Assess*, 190(9), 559. doi:10.1007/s10661-018-6942-6
- Lovas-Kiss, Á., Sánchez, M. I., Molnár V, A., Valls, L., Armengol, X., Mesquita-Joanes, F., & Green, A. J. (2018). Crayfish invasion facilitates dispersal of plants and invertebrates by gulls. *Freshwater Biology*, 63(4), 392-404. doi:10.1111/fwb.13080
- Luja, V. H., Rodriguez-Estrella, R., Ratzlaff, K., Parra-Olea, G., & Ramirez-Bautista, A. (2012). THE CHYTRID FUNGUS BATRACHOCHYTRIUM DENDROBATIDIS IN ISOLATED POPULATIONS OF THE BAJA CALIFORNIA TREEFROG PSEUDACRIS HYPOCHONDRIACA CURTA IN BAJA CALIFORNIA SUR, MEXICO. *Southwestern Naturalist*, 57(3), 323-327.
- Luz-Agostinho, K. D. G., Agostinho, A. A., Gomes, L. C., & Júlio, H. F. (2008). Influence of flood pulses on diet composition and trophic relationships among piscivorous fish in the upper Paraná River floodplain. *Hydrobiologia*, 607(1). doi:10.1007/s10750-008-9390-4
- Maccarrone, V., Filiciotto, F., Buffa, G., Stefano, V. D., Quinci, E. M., Vincenzi, G. d., . . . Buscaino, G. (2016). An Invasive Species in a Protected Area of Southern Italy: the Structure, Dynamics and Spatial Distribution of the Crayfish *Procambarus clarkii*. *Turkish Journal of Fisheries and Aquatic Sciences*, 16(2). doi:10.4194/1303-2712-v16\_2\_20
- Maceda-Veiga, A., De Sostoa, A., & Sánchez-Espada, S. (2012). Factors affecting the establishment of the invasive crayfish *Procambarus clarkii* (Crustacea, Decapoda) in the Mediterranean rivers of the northeastern Iberian Peninsula. *Hydrobiologia*, 703(1), 33-45. doi:10.1007/s10750-012-1335-2

- Macías, M., Green, A. J., & Sánchez, M. I. (2004). The Diet of the Glossy Ibis During the Breeding Season in Doñana, Southwest Spain. *Waterbirds*, 27(2), 234-239. doi:10.1675/1524-4695(2004)027[0234:Tdotgi]2.0.Co;2
- Maciaszek, R., Bonk, M., & Struzyński, W. (2019). New records of the invasive red swamp crayfish *Procambarus clarkii* (Girard, 1852) (Decapoda: Cambaridae) from Poland. *Knowledge & Management of Aquatic Ecosystems*, (420). doi:10.1051/kmae/2019033
- Maciel, C. R., New, M. B., & Valenti, W. C. (2012). The Predation of *Artemia Nauplii* by the Larvae of the Amazon River Prawn, *Macrobrachium amazonicum* (Heller, 1862), is Affected by Prey Density, Time of Day, and Ontogenetic Development. *Journal of the World Aquaculture Society*, 43(5), 659-669. doi:10.1111/j.1749-7345.2012.00599.x
- Maciel, C. R., Quadros, M. L., Abrunhosa, F., Bastos, S., Schneider, H., & Sampaio, I. (2011). Occurrence of the Indo-Pacific freshwater prawn *Macrobrachium equidens* Dana 1852 on the coast of Brazilian Amazonia, with notes on its reproductive biology. *An Acad Bras Cienc*, 83(2), 533-544. doi:10.1590/s0001-37652011000200013
- Madden, J. D., Grodner, R. M., Feagley, S. E., Finerty, M. W., & Andrews, L. S. (1991). Minerals and Xenobiotic Residues in the Edible Tissues of Wild and Pond-Raised Louisiana Crayfish. *Journal of Food Safety*, 12(1), 1-15. doi:10.1111/j.1745-4565.1991.tb00062.x
- Magalhães, C., Bueno, S. L. S., Bond-Buckup, G., Valenti, W. C., Silva, H. L. M. d., Kiyohara, F., . . . Rocha, S. S. (2005). Exotic species of freshwater decapod crustaceans in the state of São Paulo, Brazil: records and possible causes of their introduction. *Biodiversity and Conservation*, 14(8), 1929-1945. doi:10.1007/s10531-004-2123-8
- Mancinelli, G., Papadia, P., Ludovisi, A., Migoni, D., Bardelli, R., Fanizzi, F. P., & Vizzini, S. (2018). Beyond the mean: A comparison of trace- and macroelement correlation profiles of two lacustrine populations of the crayfish *Procambarus clarkii*. *Sci Total Environ*, 624, 1455-1466. doi:10.1016/j.scitotenv.2017.12.106
- Manenti, R., Bonelli, M., Scaccini, D., Binda, A., & Zugnoni, A. (2014). *Austropotamobius pallipes* reduction vs. *Procambarus clarkii* spreading: Management implications. *Journal for Nature Conservation*, 22(6), 586-591. doi:10.1016/j.jnc.2014.09.001
- Manenti, R., Falaschi, M., Monache, D. D., Marta, S., & Ficetola, G. F. (2019). Network-scale effects of invasive species on spatially-structured amphibian populations. *Ecography*, 43(1), 119-127. doi:10.1111/ecog.04571
- Manenti, R., Ghia, D., Fea, G., Ficetola, G. F., Padoa-Schioppa, E., & Canedoli, C. (2019). Causes and consequences of crayfish extinction: Stream connectivity, habitat changes, alien species and ecosystem services. *Freshwater Biology*, 64(2), 284-293. doi:10.1111/fwb.13215
- Manenti, R., Zanetti, N., Pennati, R., & Scari, G. (2016). Factors driving semi-aquatic predator occurrence in traditional cattle drinking pools: conservation issues. *Journal of Limnology*, 76. doi:10.4081/jlimnol.2016.1447
- Manickam, N., Bhavan, P. S., Santhanam, P., Bhuvaneswari, R., Muralisankar, T., Srinivasan, V., . . . Karthik, M. (2018). Impact of seasonal changes in zooplankton biodiversity in

Ukkadam Lake, Coimbatore, Tamil Nadu, India, and potential future implications of climate change. *The Journal of Basic and Applied Zoology*, 79(1). doi:10.1186/s41936-018-0029-3

Mansur, C. d. B., & Hebling, N. J. (2002). Análise comparativa entre a fecundidade de *Dilocarcinus pagei* Stimpson e *Sylviocarcinus australis* Magalhães & Turkey (Crustacea, Decapoda, Trichodactylidae) no Pantanal do Rio Paraguai, Porto Murtinho, Mato Grosso do Sul. [Comparative analysis of fecundity between *Dilocarcinus pagei* Stimpson and *Sylviocarcinus australis* Magalhães & Turkey (Crustacea, Decapoda, Trichodactylidae) in the Pantanal region of Paraguay River, Porto Murtinho, Mato Grosso do Sul]. *Revista Brasileira De Zoologia*, 19(3), 797-805. doi:10.1590/s0101-81752002000300018

Marchi, M., Jørgensen, S. E., Bécares, E., Corsi, I., Marchettini, N., & Bastianoni, S. (2011). Dynamic model of Lake Chozas (León, NW Spain)—Decrease in eco-exergy from clear to turbid phase due to introduction of exotic crayfish. *Ecological Modelling*, 222(16), 3002-3010. doi:10.1016/j.ecolmodel.2011.04.016

Marchi, M., Jørgensen, S. E., Bécares, E., Fernández-Aláez, C., Rodríguez, C., Fernández-Aláez, M., . . . Bastianoni, S. (2012). Effects of eutrophication and exotic crayfish on health status of two Spanish lakes: a joint application of ecological indicators. *Ecological Indicators*, 20, 92-100. doi:10.1016/j.ecolind.2012.02.005

Marques, H. L. d. A., Barros, H. P., Mallasen, M., Boock, M. V., & Moraes Valenti, P. M. C. (2012). Influence of stocking densities in the nursery phase on the growth of *Macrobrachium amazonicum* reared in net pens. *Aquaculture*, 358-359, 240-245. doi:10.1016/j.aquaculture.2012.06.011

Marques, M., Banha, F., Águas, M., & Anastácio, P. (2014). Environmental cues during overland dispersal by three freshwater invaders: *Eriocheir sinensis*, *Pacifastacus leniusculus*, and *Procambarus clarkii* (Crustacea, Decapoda). *Hydrobiologia*, 742(1), 81-93. doi:10.1007/s10750-014-1968-4

Martino, A., Syväranta, J., Crivelli, A., Cereghino, R., & Santoul, F. (2011). Is European catfish a threat to eels in southern France? *Aquatic Conservation: Marine and Freshwater Ecosystems*, 21(3), 276-281. doi:10.1002/aqc.1177

Martin-Torrijos, L., Campos Llach, M., Pou-Rovira, Q., & Dieguez-Uribeondo, J. (2017). Resistance to the crayfish plague, *Aphanomyces astaci* (Oomycota) in the endangered freshwater crayfish species, *Austropotamobius pallipes*. *PLoS One*, 12(7), e0181226. doi:10.1371/journal.pone.0181226

Martín-Torrijos, L., Correa-Villalona, A. J., Pradillo, A., & Diéguez-Uribeondo, J. (2021). Coexistence of Two Invasive Species, *Procambarus clarkii* and *Aphanomyces astaci*, in Brackish Waters of a Mediterranean Coastal Lagoon. *Frontiers in Ecology and Evolution*, 8. doi:10.3389/fevo.2020.622434

Martin-Torrijos, L., Kokko, H., Makkonen, J., Jussila, J., & Dieguez-Uribeondo, J. (2019). Mapping 15 years of crayfish plague in the Iberian Peninsula: The impact of two invasive species on the endangered native crayfish. *PLoS One*, 14(8), e0219223. doi:10.1371/journal.pone.0219223

- Marufu, L., Dalu, T., Crispen, P., Barson, M., Simango, R., Utete, B., & Nhiwatiwa, T. (2018). The diet of an invasive crayfish, *Cherax quadricarinatus* (Von Martens, 1868), in Lake Kariba, inferred using stomach content and stable isotope analyses. *BioInvasions Records*, 7(2), 121-132. doi:10.3391/bir.2018.7.2.03
- Matsuzaki, S. S., Usio, N., Takamura, N., & Washitani, I. (2009). Contrasting impacts of invasive engineers on freshwater ecosystems: an experiment and meta-analysis. *Oecologia*, 158(4), 673-686. doi:10.1007/s00442-008-1180-1
- Mazza, G., Sofia, A., Reboleira, P. S., Goncalves, F., Aquiloni, L., Inghilesi, A., . . . Tricarico, E. (2014). A New Threat to Groundwater Ecosystems: First Occurrences of the Invasive Crayfish *Procambarus clarkii* (Girard, 1852) in European Caves. *Journal of Cave and Karst Studies*, 76(1), 62-65. doi:10.4311/2013lsc0115
- Mazzarelli, C. C., Santos, M. R., Amorim, R. V., & Augusto, A. (2015). Effect of salinity on the metabolism and osmoregulation of selected ontogenetic stages of an Amazon population of *Macrobrachium amazonicum* shrimp (Decapoda, Palaemonidae). *Braz J Biol*, 75(2), 372-379. doi:10.1590/1519-6984.14413
- Meineri, E., Rodriguez-Perez, H., Hilaire, S., & Mesleard, F. (2014). Distribution and reproduction of *Procambarus clarkii* in relation to water management, salinity and habitat type in the Camargue. *Aquatic Conservation: Marine and Freshwater Ecosystems*, 24(3), 312-323. doi:10.1002/aqc.2410
- Meira, A., Lopes-Lima, M., Varandas, S., Teixeira, A., Arenas, F., & Sousa, R. (2019). Invasive crayfishes as a threat to freshwater bivalves: Interspecific differences and conservation implications. *Sci Total Environ*, 649, 938-948. doi:10.1016/j.scitotenv.2018.08.341
- Meireles, A. L., Valenti, W. C., & Mantelatto, F. L. (2013). Reproductive variability of the Amazon River prawn, *Macrobrachium amazonicum* (Caridea, Palaemonidae): influence of life cycle on egg production. *Latin American Journal of Aquatic Research*, 41(4), 718-731. doi:10.3856/vol41-issue4-fulltext-8
- Melero, Y., Palazón, S., Bonesi, L., & Gosàlbez, J. (2008). Feeding habits of three sympatric mammals in NE Spain: the American mink, the spotted genet, and the Eurasian otter. *Acta Theriologica*, 53(3), 263-273. doi:10.1007/bf03193123
- Melotto, A., Manenti, R., & Ficetola, G. F. (2020). Rapid adaptation to invasive predators overwhelms natural gradients of intraspecific variation. *Nat Commun*, 11(1), 3608. doi:10.1038/s41467-020-17406-y
- Meshram, S. J., Shingare, P. E., & Ingle, S. T. (2009). Studies on traditional methods of wild giant freshwater prawn seed collection and their potential impact on the aquatic ecosystem. 22(1), 185-189.
- Messenger, M. L., Olden, J. D., & Leung, B. (2018). Individual-based models forecast the spread and inform the management of an emerging riverine invader. *Diversity and Distributions*, 24(12), 1816-1829. doi:10.1111/ddi.12829
- Mestre, A., Castillo-Escrivà, A., Rueda, J., Monrós, J. S., & Mesquita-Joanes, F. (2015). Experimental spillover of an exotic ectosymbiont on an European native crayfish: the

importance of having a chance. *Hydrobiologia*, 755(1), 225-237. doi:10.1007/s10750-015-2236-y

Mestre, A., Monrós, J. S., & Mesquita-Joanes, F. (2011). Comparison of Two Chemicals for Removing an Entocytherid (Ostracoda: Crustacea) Species from Its Host Crayfish (Cambaridae: Crustacea). *International Review of Hydrobiology*, 96(4), 347-355. doi:10.1002/iroh.201111343

Miranda, L. M., Rodrigues, L. R., Pantaleão, J. A. F., & Andrade, L. S. d. (2020). REPRODUCTIVE ASPECTS OF THE PRAWN *Macrobrachium amazonicum* IN A CONTINENTAL POPULATION LIVING DOWNSTREAM OF A HYDROELECTRIC DAM. *Boletim Do Instituto De Pesca*, 46(3), 1-8. doi:10.20950/1678-2305.2020.46.3.589

Mistri, M. (2019). Distribution and population structure and dynamics of the red swamp crayfish *Procambarus clarkii* (Girard, 1852) in the eastern Po Valley and its Delta (northeastern Italy). *BioInvasions Records*, 8(1), 142-153. doi:10.3391/bir.2019.8.1.16

Miyake, M., & Miyashita, T. (2011). Identification of alien predators that should not be removed for controlling invasive crayfish threatening endangered odonates. *Aquatic Conservation: Marine and Freshwater Ecosystems*, 21(3), 292-298. doi:10.1002/aqc.1178

Mizuno, K., Abukawa, K., Kashima, T., Asada, A., Fujimoto, Y., & Shimada, T. (2015). Assessing the biological process of *Hydrilla verticillata* predation in a eutrophic pond using high-resolution acoustic imaging sonar. *Limnology*, 17(1), 13-21. doi:10.1007/s10201-015-0451-x

Mkoji, G. M., Hofkin, B. V., Kuris, A. M., Stewart-Oaten, A., Mungai, B. N., Kihara, J. H., . . . Loker, E. S. (1999). Impact of the crayfish *Procambarus clarkii* on *Schistosoma haematobium* transmission in Kenya. *Am J Trop Med Hyg*, 61(5), 751-759. doi:10.4269/ajtmh.1999.61.751

Moody, E. K., & Taylor, C. A. (2012). RED SWAMP CRAWFISH (*PROCAMBARUS CLARKII*) DISCOVERED IN THE SAN PEDRO RIVER, ARIZONA: A NEW INVADER IN A THREATENED ECOSYSTEM. *Southwestern Naturalist*, 57(3), 339-340.

Moraes, S. A. S. N., Alencar, C. E. R. D., Lima, S. M. Q., & Freire, F. A. M. (2021). Shape variation of the prawn *Macrobrachium jelskii* (Palaemonidae: Decapoda) in the Neotropical semiarid drainages: an intra- and inter-basin investigation. *Marine and Freshwater Research*, 72(1). doi:10.1071/mf19201

Moraes-Valenti, P., de Moraes, P. A., de Lima Preto, B., & Valenti, W. C. (2010). Effect of density on population development in the Amazon River prawn *Macrobrachium amazonicum*. *Aquatic Biology*, 9(3), 291-301. doi:10.3354/ab00261

Moraes-Valenti, P. M. C., & Valenti, W. C. (2007). Effect of Intensification on Grow Out of the Amazon River Prawn, *Macrobrachium amazonicum*. *Journal of the World Aquaculture Society*, 38(4), 516-526. doi:10.1111/j.1749-7345.2007.00125.x

Moreno, C. A., Graziani, C. A., Barrios, A. J., Villarroel, E. J., & Marcano, N. J. (2012). Population structure of the exotic shrimp *Macrobrachium rosenbergii* de man, 1879

- (Crustacea: Palaemonidae) in morocoto river, sucre state, Venezuela. *Zootecnia Tropical*, 30(3), 237-250.
- Mori, E., & Mazza, G. (2019). Diet of a semiaquatic invasive mammal in northern Italy: Could it be an alarming threat to the endemic water vole? *Mammalian Biology*, 97, 88-94. doi:10.1016/j.mambio.2019.05.003
- Morioka, S., Andriantsoa, M., Rafalimanana, T., Koizumi, N., & Hanamura, Y. (2008). Occurrence of the non-indigenous freshwater prawn, *Macrobrachium rosenbergii* (De Man, 1879) (Decapoda, Caridea, Palaemonidae) in Madagascar. *Crustaceana*, 81(9), 1143-1149. doi:10.1163/156854008x360860
- Mossolin, E. C., Peirò, D. F., Rossingnoli, M. O., Rajab, L. P., & Mantelatto, F. L. M. (2013). <b>Population and reproductive features of the freshwater shrimp <i>Macrobrachium jelskii</i> (Miers, 1877) from São Paulo State, Brazil</b> - doi: 10.4025/actascibiolsoci.v35i3.15815. *Acta Scientiarum. Biological Sciences*, 35(3).
- Mota-Ferreira, M., Beja, P., & Liu, X. (2020). Combining geostatistical and biotic interaction model to predict amphibian refuges under crayfish invasion across dendritic stream networks. *Diversity and Distributions*, 26(6), 699-714. doi:10.1111/ddi.13047
- Mouser, J., Ashley, D., Aley, T., & Brewer, S. (2018). Subterranean Invasion by Gapped Ringed Crayfish: Effectiveness of a Removal Effort and Barrier Installation. *Diversity*, 11(1). doi:10.3390/d11010003
- Mrugała, A., Kawai, T., Kozubíková-Balcarová, E., & Petrusek, A. (2017). Aphanomyces astacipresence in Japan: a threat to the endemic and endangered crayfish speciesCambaroides japonicus? *Aquatic Conservation: Marine and Freshwater Ecosystems*, 27(1), 103-114. doi:10.1002/aqc.2674
- Mueller, G. A., Carpenter, J., Thornbrugh, D., & Bestgen, K. (2006). Bullfrog Tadpole (*Rana Catesbeiana*) and Red Swamp Crayfish (*Procambarus clarkii*) Predation on Early Life Stages of Endangered Razorback Sucker (*Xyrauchen Texanus*). *The Southwestern Naturalist*, 51(2), 258-261. doi:10.1894/0038-4909(2006)51[258:Btrcar]2.0.Co;2
- Mueller, K. W. (2001). First record of the red swamp crayfish, *Procambarus clarkii* (Girard, 1852) (Decapoda, Cambaridae), from Washington state, USA. *Crustaceana*, 74, 1003-1007.
- Mueller, K. W. (2007). Reproductive Habits of Non-native Red Swamp Crayfish (*Procambarus clarkii*) at Pine Lake, Sammamish, Washington. *Northwest Science*, 81(3), 246-250. doi:10.3955/0029-344x-81.3.246
- Mueller, K. W. (2007). Status of the Crayfish Stocks in Pine Lake, King County, Washington Five Years after the Discovery of the Invasive Red Swamp Crayfish*Procambarus clarkii*(Girard, 1852). *Journal of Freshwater Ecology*, 22(2), 351-353. doi:10.1080/02705060.2007.9665058
- Mueller, K. W., & Bodensteiner, L. R. (2011). Shelter Occupancy by Mixed-Species Pairs of Native Signal Crayfish and Non-Native Red Swamp Crayfish Held in Enclosures. *Journal of Freshwater Ecology*, 24(1), 67-76. doi:10.1080/02705060.2009.9664266



- Mustafa, F.-B., & Bwadi, B. E. (2018). Determination of Optimal Freshwater Prawn Farming Site Locations using GIS and Multicriteria Evaluation. *Journal of Coastal Research*, 82, 41-54. doi:10.2112/si82-006.1
- Nascimento, W. M., De Lucena, I. C., Macedo, R. S., & Pinheiro, A. P. (2020). Sexual size dimorphism of the freshwater shrimp *Macrobrachium jelskii* (Miers, 1877) (Decapoda: Palaemonidae) and its relationship to Rensch's rule. *Invertebrate Reproduction & Development*, 64(2), 106-114. doi:10.1080/07924259.2020.1726513
- Neves, M. P., Delariva, R. L., Guimaraes, A. T., & Sanches, P. V. (2015). Carnivory during Ontogeny of the Plagioscion squamosissimus: A Successful Non-Native Fish in a Lentic Environment of the Upper Parana River Basin. *PLoS One*, 10(11), e0141651. doi:10.1371/journal.pone.0141651
- Nishijima, S., Nishikawa, C., & Miyashita, T. (2017). Habitat modification by invasive crayfish can facilitate its growth through enhanced food accessibility. *BMC Ecol*, 17(1), 37. doi:10.1186/s12898-017-0147-7
- Nóbrega, P. S. V. d., Bentes, B., & Martinelli-Lemos, J. M. (2013). Composition of shrimp populations (Crustacea: Decapoda) in non-vegetated areas of two river islands in a Brazilian Amazon estuary. *Zoologia (Curitiba)*, 30(6), 652-660. doi:10.1590/s1984-46702013005000004
- Nogueira, C. S., Perroca, J. F., Batista, A. C., & Costa, R. C. (2020). Reproductive traits of the freshwater prawn *Macrobrachium amazonicum* (Decapoda: Palaemonidae) in an isolated water reservoir. *Revista Mexicana De Biodiversidad*, 91. doi:10.22201/ib.20078706e.2020.91.3387
- Norrocky, M. J. (1983). *PROCAMBARUS* (SCAPULICAMBARUS) *CLARKII* (GIRARD, 1852) - THE RED SWAMP CRAYFISH IN OHIO. *Ohio Journal of Science*, 83(5), 271-273.
- Nunes, A., Andrade, P., Rebelo, R., Guerreiro, C., Almeida, E., & Alves, S. (2011). Antipredator responses of two anurans towards native and exotic predators. *Amphibia-Reptilia*, 32(3), 341-350. doi:10.1163/017353711x579849
- Nunes, A. L., Cruz, M. J., Tejedo, M., Laurila, A., & Rebelo, R. (2010). Nonlethal injury caused by an invasive alien predator and its consequences for an anuran tadpole. *Basic and Applied Ecology*, 11(7), 645-654. doi:10.1016/j.baae.2010.09.003
- Nunes, A. L., Hoffman, A. C., Zengeya, T. A., Measey, G. J., & Weyl, O. L. F. (2017). Red swamp crayfish, *Procambarus clarkii*, found in South Africa 22 years after attempted eradication. *Aquatic Conservation: Marine and Freshwater Ecosystems*, 27(6), 1334-1340. doi:10.1002/aqc.2741
- Nunes, A. L., Orizaola, G., Laurila, A., & Rebelo, R. (2014). Morphological and life-history responses of anurans to predation by an invasive crayfish: an integrative approach. *Ecol Evol*, 4(8), 1491-1503. doi:10.1002/ece3.979
- Nunes, A. L., Orizaola, G., Laurila, A., & Rebelo, R. (2014). Rapid evolution of constitutive and inducible defenses against an invasive predator. *Ecology*, 95(6), 1520-1530. doi:10.1890/13-1380.1

- Nunes, A. L., Richter-Boix, A., Laurila, A., & Rebelo, R. (2013). Do anuran larvae respond behaviourally to chemical cues from an invasive crayfish predator? A community-wide study. *Oecologia*, 171(1), 115-127. doi:10.1007/s00442-012-2389-6
- Nunes, A. L., Zengeya, T. A., Measey, G. J., & Weyl, O. L. F. (2017). Freshwater crayfish invasions in South Africa: past, present and potential future. *African Journal of Aquatic Science*, 42(4), 309-323. doi:10.2989/16085914.2017.1405788
- O'Shaughnessey, E. M., & Keller, R. P. (2019). When invaders collide: competition, aggression, and predators affect outcomes in overlapping populations of red swamp (*Procambarus clarkii*) and rusty (*Faxonius rusticus*) crayfishes. *Biological Invasions*, 21(12), 3671-3683. doi:10.1007/s10530-019-02079-6
- Oficialdegui, F. J., Clavero, M., Sánchez, M. I., Green, A. J., Boyero, L., Michot, T. C., . . . Lejeusne, C. (2019). Unravelling the global invasion routes of a worldwide invader, the red swamp crayfish (*Procambarus clarkii*). *Freshwater Biology*, 64(8), 1382-1400. doi:10.1111/fwb.13312
- Oficialdegui, F. J., Sánchez, M. I., Lejeusne, C., Pacini, N., & Clavero, M. (2019). Brought more than twice: the complex introduction history of the red swamp crayfish into Europe. *Knowledge & Management of Aquatic Ecosystems*, (421). doi:10.1051/kmae/2019044
- Ohtaka, A., Gelder, S. R., & Smith, R. J. (2017). Long-anticipated new records of an ectosymbiotic branchiobdellidan and an ostracod on the North American red swamp crayfish, *Procambarus clarkii* (Girard, 1852) from an urban stream in Tokyo, Japan. *Plankton & Benthos Research*, 12(2), 123-128.
- Oluoch, A. O. (1990). Breeding biology of the Louisiana red swamp crayfish *Procambarus clarkii* Girard in Lake Naivasha, Kenya. *Hydrobiologia*, 208(1-2), 85-92. doi:10.1007/bf00008447
- Paillisson, J. M., Soudieux, A., & Damien, J. P. (2011). Capture efficiency and size selectivity of sampling gears targeting red-swamp crayfish in several freshwater habitats. *Knowledge and Management of Aquatic Ecosystems*, (401). doi:10.1051/kmae/2011015
- Palmas, F., Podda, C., Frau, G., Cau, A., Moccia, D., Peddio, S., . . . Sabatini, A. (2019). Invasive crayfish (*Procambarus clarkii*, Girard, 1852) in a managed brackish wetland (Sardinia, Italy): Controlling factors and effects on sedimentary organic matter. *Estuarine, Coastal and Shelf Science*, 231. doi:10.1016/j.ecss.2019.106459
- Pantaleao, J. A., Hirose, G. L., & Costa, R. C. (2014). Occurrence of male morphotypes of *Macrobrachium amazonicum* (Caridea, Palaemonidae) in a population with an entirely freshwater life cycle. *Braz J Biol*, 74(3 Suppl 1), S223-232. doi:10.1590/1519-6984.03713
- Pantaleão, J. A. F., Hirose, G. L., & Costa, R. C. (2012). Relative growth, morphological sexual maturity, and size of *Macrobrachium amazonicum* (Heller 1862) (Crustacea, Decapoda, Palaemonidae) in a population with an entirely freshwater life cycle. *Invertebrate Reproduction & Development*, 56(3), 180-190. doi:10.1080/07924259.2011.587276

- Parhi, J., Lakra, W. S., Majumdar, K. C., Mukherjee, S. C., Goswami, M., Ravinder, K., & Sahoo, L. (2008). Molecular phylogeny of freshwater prawn (Genus : *Macrobrachium*) species based on mtDNA 16S rRNA gene sequencing. *Indian Journal of Animal Sciences*, 78(4), 425-429.
- Parpet, J.-F., & Gelder, S. R. (2020). **North American Branchiobdellida (Annelida: Clitellata) or Crayfish Worms in France: the most diverse distribution of these exotic ectosymbionts in Europe**. *Zoosymposia*, 17(1), 121-140. doi:10.11646/zoosymposia.17.1.12
- Parreira de Castro, D. M., Reis de Carvalho, D., Pompeu Pdos, S., Moreira, M. Z., Nardoto, G. B., & Callisto, M. (2016). Land Use Influences Niche Size and the Assimilation of Resources by Benthic Macroinvertebrates in Tropical Headwater Streams. *PLoS One*, 11(3), e0150527. doi:10.1371/journal.pone.0150527
- Pascali, J. P., Viel, G., Cecchetto, G., Pigaiani, N., Vanin, S., Montisci, M., & Fais, P. (2020). The Red Swamp Crayfish *Procambarus clarkii* (the Louisiana Crayfish) as a Particular Scavenger on a Human Corpse. *J Forensic Sci*, 65(1), 323-326. doi:10.1111/1556-4029.14145
- Paschoal, L. R. P., de Oliveira, L. J. F., Andrioli, G. C., & Zara, F. J. (2019). Reproductive biology of *Macrobrachium amazonicum* (Heller, 1862) populations with distinct phenotypes in Neotropical reservoirs during the 'El Niño' event. *Marine and Freshwater Research*, 70(10), 1465-1479. doi:10.1071/mf18228
- Payette, A. L., & McGaw, I. J. (2003). Thermoregulatory behavior of the crayfish *Procambarus clarki* in a burrow environment. *Comp Biochem Physiol A Mol Integr Physiol*, 136(3), 539-556. doi:10.1016/s1095-6433(03)00203-4
- Pearl, C., Adams, M., & McCreary, B. (2013). Habitat and co-occurrence of native and invasive crayfish in the Pacific Northwest, USA. *Aquatic Invasions*, 8(2), 171-184. doi:10.3391/ai.2013.8.2.05
- Pease, K. M., & Wayne, R. K. (2014). Divergent responses of exposed and naive Pacific tree frog tadpoles to invasive predatory crayfish. *Oecologia*, 174(1), 241-252. doi:10.1007/s00442-013-2745-1
- Peris, S. J., Briz, F. J., & Campos, F. (1995). SHIFTS IN THE DIET OF THE GREY HERON (ARDEA-CINEREA) IN THE DUERO BASIN, CENTRAL-WEST SPAIN, FOLLOWING THE INTRODUCTION OF EXOTIC FISH SPECIES. *Folia Zoologica*, 44(2), 97-102.
- Peterson, M., Vervaeke, W., Woodley, C., & Slack, W. (2002). Occurrence of the Non-Indigenous Giant Malaysian Prawn, *Macrobrachium rosenbergii* (De Man, 1879) in Simmons Bayou, Mississippi, U.S.A. *Crustaceana*, 75(8), 1025-1031. doi:10.1163/15685400260569652
- Pettovello, A. D. (1996). First Record of *Macrobrachium amazonicum* (Decapoda, Palaemonidae) in Argentina1). *Crustaceana*, 69(1), 113-114. doi:10.1163/156854096x00141

- Piazza, F., Aquiloni, L., Peruzza, L., Manfrin, C., Simi, S., Marson, L., . . . Giulianini, P. G. (2015). Managing of *Procambarus clarkii* by X-ray sterilisation of males: Cytological damage to gonads. *Micron*, 77, 32-40. doi:10.1016/j.micron.2015.05.016
- Piersanti, S., Pallottini, M., Salerno, G., Goretti, E., Elia, A. C., Dörr, A. J. M., & Rebora, M. (2018). Resistance to dehydration and positive hygrotaxis in the invasive red swamp crayfish *Procambarus clarkii*. *Knowledge & Management of Aquatic Ecosystems*, (419). doi:10.1051/kmae/2018024
- Pileggi, L. G., Magalhaes, C., Bond-Buckup, G., & Mantelatto, F. L. (2013). New records and extension of the known distribution of some freshwater shrimps in Brazil. *Revista Mexicana De Biodiversidad*, 84(2), 563-574. doi:10.7550/rmb.30504
- Pinheiro, M. A. A., & Taddei, F. G. (2005). Crescimento do caranguejo de água doce, *Dilocarcinus pagei* Stimpson (Crustacea, Brachyura, Trichodactylidae). *Revista Brasileira De Zoologia*, 22(3), 522-528. doi:10.1590/s0101-81752005000300002
- Pinheiro, M. A. A., & Taddei, F. G. (2005). Relação peso/largura da carapaça e fator de condição em *Dilocarcinus pagei* Stimpson (Crustacea, Trichodactylidae), em São José do Rio Preto, São Paulo, Brasil. *Revista Brasileira De Zoologia*, 22(4), 825-829. doi:10.1590/s0101-81752005000400002
- Pintor, L. M., & Sih, A. (2010). Scale dependent effects of native prey diversity, prey biomass and natural disturbance on the invasion success of an exotic predator. *Biological Invasions*, 13(6), 1357-1366. doi:10.1007/s10530-010-9894-5
- Piscia, R., Volta, P., Boggero, A., & Manca, M. (2011). The invasion of Lake Orta (Italy) by the red swamp crayfish *Procambarus clarkii* (Girard, 1852): a new threat to an unstable environment. *Aquatic Invasions*, 6(Supplement 1), S45-S48. doi:10.3391/ai.2011.6.S1.010
- Pockl, M. Distribution of crayfish species in Austria with special reference to introduced species 1998.
- PÖckl, M., & Pekny, R. (2008). Interaction between Native and Alien Species of Crayfish in Austria: Case Studies. *Bulletin Français de la Pêche et de la Pisciculture*, (367), 763-776. doi:10.1051/kmae:2002064
- Pontes, N. d. A., Sant'Anna, B. S., & Hattori, G. Y. (2020). Color variation of the freshwater crab *Dilocarcinus pagei* Stimpson, 1861 captured in the Amazon region at Itacoatiara, Amazonas, Brazil. *Nauplius*, 28. doi:10.1590/2358-2936e2020026
- Portheault, A., Díaz-Paniagua, C., & Gómez-Rodríguez, C. (2007). Predation on amphibian eggs and larvae in temporary ponds: The case of *Bufo calamita* in southwestern Spain. *Revue d'Ecologie (La Terre et la Vie)*, 62(4), 315-322.
- Poulin, B., Lefebvre, G., & Crivelli, A. J. (2007). The invasive red swamp crayfish as a predictor of Eurasian bittern density in the Camargue, France. *Journal of Zoology*, 273(1), 98-105. doi:10.1111/j.1469-7998.2007.00304.x

- Prigioni, C., Smioldo, G., Remonti, L., & Balestrieri, A. (2009). DISTRIBUTION AND DIET OF REINTRODUCED OTTERS (*LUTRA LUTRA*) ON THE RIVER TICINO (NW ITALY). *Hystrix-Italian Journal of Mammalogy*, 20(1), 45-54.
- Pujol-Buxó, E., San Sebastián, O., Garriga, N., & Llorente, G. A. (2013). How does the invasive/native nature of species influence tadpoles' plastic responses to predators? *Oikos*, 122(1), 19-29. doi:10.1111/j.1600-0706.2012.20617.x
- Pushparajan, N., Soundarapandian, P., Lyla, P. S., Anand, T., & Varadharajan, D. (2012). Shrimp larval ingress in Pitchavaram Mangroves South East Coast of India. *Journal of Applied Sciences Research*, 8(3), 1775-1786.
- Putra, M. D., Bláha, M., Wardiatno, Y., Krisanti, M., Yonvitner, Jerikho, R., . . . Patoka, J. (2018). *Procambarus clarkii* (Girard, 1852) and crayfish plague as new threats for biodiversity in Indonesia. *Aquatic Conservation: Marine and Freshwater Ecosystems*, 28(6), 1434-1440. doi:10.1002/aqc.2970
- Quaresma, M. C., Nóbrega, P. S. V., Sarpedonti, V., Costa-Tavares, V. B., & Martinelli-Lemos, J. M. (2019). Prawn larvae of *Macrobrachium amazonicum* (Decapoda, Palaemonidae) in contaminated oligohaline creeks on the Amazon estuary. *Journal of Natural History*, 53(3-4), 209-219. doi:10.1080/00222933.2019.1582814
- Ramalho, R. O., & Anastácio, P. M. (2014). Factors inducing overland movement of invasive crayfish (*Procambarus clarkii*) in a ricefield habitat. *Hydrobiologia*, 746(1), 135-146. doi:10.1007/s10750-014-2052-9
- Ramalho, R. O., Correia, A. M., & Anastácio, P. M. (2008). Effects of density on growth and survival of juvenile Red Swamp Crayfish, *Procambarus clarkii* (Girard), reared under laboratory conditions. *Aquaculture Research*, 39(6), 577-586. doi:10.1111/j.1365-2109.2008.01907.x
- Ramamonjisoa, N., Nakanishi, K., & Natuhara, Y. (2019). The efficacy of a generalized antipredator defense against a novel predator depends on the source of induction in prey. *Hydrobiologia*, 836(1), 197-205. doi:10.1007/s10750-019-3951-6
- Ramamonjisoa, N., Rakotonoely, H., & Natuhara, Y. (2018). Differential vulnerability of two sympatric tadpoles to an invasive crayfish predator. *Hydrobiologia*, 818(1), 119-127. doi:10.1007/s10750-018-3599-7
- Ramirez, A., Paaby, P., Pringle, C. M., & Agüero, G. (1998). Effect of habitat type on benthic macroinvertebrates in two lowland tropical streams, Costa Rica. *Revista De Biología Tropical*, 46, 201-213.
- Ramírez, E., Silva, A., Guevara, M., Núñez, M., Bauza, R., & Arredondo-Vega, B. (2010). Biochemical composition of the freshwater shrimp *Macrobrachium jelskii* (Miers, 1877) under culture conditions. *Zootecnia Tropical*, 28(1), 65-72.
- Ratcliffe, J. A., & DeVries, D. R. (2004). The Crayfishes (Crustacea: Decapoda) of the Tallapoosa River Drainage, Alabama. *Southeastern Naturalist*, 3(3), 417-430.

- Rebelo, R., & Cruz, M. J. (2005). Vulnerability of Southwest Iberian amphibians to an introduced crayfish, *Procambarus clarkii*. *Amphibia-Reptilia*, 26(3), 293-303. doi:10.1163/156853805774408577
- Riascos, L., Geerts, A. N., Oña, T., Goethals, P., Cevallos-Cevallos, J., Vanden Berghe, W., . . . Van der heyden, C. (2018). DNA-based monitoring of the alien invasive North American crayfish *Procambarus clarkii* in Andean lakes (Ecuador). *Limnologia*, 70, 20-25. doi:10.1016/j.limno.2018.02.002
- Rincon-Leon, F., Zurera-Cosano, G., & Pozo-Lora, R. (1988). Lead and cadmium concentrations in red crayfish (*Procambarus clarkii*, G.) in the Guadalquivir River marshes (Spain). *Arch Environ Contam Toxicol*, 17(2), 251-256. doi:10.1007/BF01056032
- Rocha, S. S. d., & Barbosa, R. d. J. (2017). Population biology of *Macrobrachium jelskii* (Miers, 1877) (Decapoda, Palaemonidae) from an artificial pond in Bahia, Brazil. *Nauplius*, 25(0). doi:10.1590/2358-2936e2017023
- Rocha-Ramírez, A., Ramírez-Rojas, A., Chávez-López, R., & Alcocer, J. (2006). Invertebrate Assemblages Associated with Root Masses of *Eichhornia crassipes* (Mart.) Solms-Laubach 1883 in the Alvarado Lagoonal System, Veracruz, Mexico. *Aquatic Ecology*, 41(2), 319-333. doi:10.1007/s10452-006-9054-2
- Rodrigues, A. C. M., Machado, A. L., Bordalo, M. D., Saro, L., Simao, F. C. P., Rocha, R. J. M., . . . Pestana, J. L. T. (2018). Invasive Species Mediate Insecticide Effects on Community and Ecosystem Functioning. *Environ Sci Technol*, 52(8), 4889-4900. doi:10.1021/acs.est.8b00193
- Rodrigues, D. C., Simões, L., Mullins, J., Lampa, S., Mendes, R. C., Fernandes, C., . . . Santos-Reis, M. (2014). Tracking the expansion of the American mink (*Neovison vison*) range in NW Portugal. *Biological Invasions*, 17(1), 13-22. doi:10.1007/s10530-014-0706-1
- Rodrigues, L. R., Costa, J. R. P. d., Passafaro, R. M., & Andrade, L. S. d. (2020). Do hydroelectric dams affect the abundance and population structure of freshwater shrimps? *Acta Scientiarum. Biological Sciences*, 42. doi:10.4025/actascibiols.v42i1.48928
- Rodríguez, C. F., Bécares, E., & Fernández-Aláez, M. (2003). Shift from clear to turbid phase in Lake Chozas (NW Spain) due to the introduction of American red swamp crayfish (*Procambarus clarkii*). *Hydrobiologia*, 506-509(1-3), 421-426. doi:10.1023/b:Hydr.0000008626.07042.87
- Rodríguez, C. F., Bécares, E., Fernández-aláez, M., & Fernández-aláez, C. (2005). Loss of diversity and degradation of wetlands as a result of introducing exotic crayfish. *Biological Invasions*, 7(1), 75-85. doi:10.1007/s10530-004-9636-7
- Rodríguez, D., Morales, J., Flechoso, F., Sánchez, J. A., Negro, A., & Lizana, M. (2017). On the distribution and general abundance of non-native species associated with the Ebro River (Castejón, Navarra, Ne Spain). *Russian Journal of Biological Invasions*, 8(2), 189-196. doi:10.1134/s2075111717020072

- Rodriguez-Almaraz, G. A., & Campos, E. (1994). Distribution and Status of the Crayfishes (Cambaridae) of Nuevo Leon, Mexico. *Journal of Crustacean Biology*, 14(4). doi:10.2307/1548866
- Rodríguez-Almaraz, G. A., Ortega-Vidales, V., & Treviño-Flores, J. A. (2014). Macrocrustáceos del Parque Nacional Cumbres de Monterrey, México: distribución y estado de conservación. *Revista Mexicana De Biodiversidad*, 85(1), 276-293. doi:10.7550/rmb.34967
- Rodriguez-Estival, J., Ortiz-Santaliestra, M. E., & Mateo, R. (2020). Assessment of ecotoxicological risks to river otters from ingestion of invasive red swamp crayfish in metal contaminated areas: Use of feces to estimate dietary exposure. *Environ Res*, 181, 108907. doi:10.1016/j.envres.2019.108907
- Rodriguez-Perez, H., Cayuela, H., Hilaire, S., Olivier, A., & Mesleard, F. (2013). Is the exotic red swamp crayfish (*Procambarus clarkii*) a current threat for the Mediterranean tree frog (*Hyla meridionalis*) in the Camargue (Southern France)? *Hydrobiologia*, 723(1), 145-156. doi:10.1007/s10750-013-1481-1
- Rodríguez-Pérez, H., Hilaire, S., & Mesléard, F. (2015). Temporary pond ecosystem functioning shifts mediated by the exotic red swamp crayfish (*Procambarus clarkii*): a mesocosm study. *Hydrobiologia*, 767(1), 333-345. doi:10.1007/s10750-015-2523-7
- Romagnoli, S., Ficetola, G. F., & Manenti, R. (2020). Invasive crayfish does not influence spawning microhabitat selection of brown frogs. *PeerJ*, 8, e8985. doi:10.7717/peerj.8985
- Román, J. (2014). Artificial water points for wildlife management facilitate the spread of red swamp crayfish (*Procambarus clarkii*). *Management of Biological Invasions*, 5(4), 341-348. doi:10.3391/mbi.2014.5.4.04
- Romano, A., Novaga, R., & Costa, A. (2016). Olim palus, where once upon a time the marsh: distribution, demography, ecology and threats of amphibians in the Circeo National Park (Central Italy). *Acta Herpetologica*, 11(2), 197-212.
- S. Abdel Gawad, S., A. M. El-Saied, A., H. Mahmoud, N., A. El-Fiqy, F., & A. Shaaban, E. (2018). The use of freshwater crayfish *Procambarus clarkii* as an indicator of the bioavailability of some heavy metals in different watercourses in Egypt and the risk assessment of these metals. *Egyptian Journal of Aquatic Biology and Fisheries*, 22(5 (Special Issue)), 121-135. doi:10.21608/ejabf.2018.19509
- Saguem, S., Sahli, A., Jdi, E. L. H., & Moutaouakil, M. E. A. E. (2021). The *Procambarus clarkii* (red swamp crayfish) in Merja Zerga wetland in Morocco: Dynamic and impacts on aquatic vegetation. *Journal of Biological Research - Bollettino della Società Italiana di Biologia Sperimentale*, 93(2). doi:10.4081/jbr.2020.8778
- Salazar, G., Graziani, C., Villarroel, E., Luna, M., Moreno, C., & Guevara, M. (2005). Hybridization between the freshwater prawns *Macrobrachium rosenbergii* (DE MAN) and *M. acanthurus* (Wiegmann). Is it possible? *Interciencia*, 30(8), 501-505+447.

- Sampaio, C. M., Silva, R. R., Santos, J. A., & Sales, S. P. (2007). Reproductive cycle of *Macrobrachium amazonicum* females (Crustacea, Palaemonidae). *Braz J Biol*, 67(3), 551-559. doi:10.1590/s1519-69842007000300022
- Sanchez Lopez, F. J., Gil Garcia, M. D., Martinez Vidal, J. L., Aguilera, P. A., & Garrido Frenich, A. (2004). Assessment of metal contamination in Donana National Park (Spain) using crayfish (*Procambarus clarkii*). *Environ Monit Assess*, 93(1-3), 17-29. doi:10.1023/b:emas.0000016789.13603.e5
- Sant'Anna, B. S., Andrade, D. R., Watanabe, T. T., & Hattori, G. Y. (2014). Behavioral repertoire and substrate choice of the freshwater crab *Dilocarcinus pagei* Stimpson, 1861 (Decapoda, Trichodactylidae). In *Crabs: Global Diversity, Behavior and Environmental Threats* (pp. 57-73).
- Santos, L. V. R., & Coelho Filho, P. A. (2021). An update of the amazon prawn (*Macrobrachium amazonicum*) distribution in the low course of the São Francisco river (northeast Brazil). *Neotropical Biology and Conservation*, 16(1), 105-114. doi:10.3897/neotropical.16.e58895
- Santos, M. R., Rodrigues, C. G., & Valenti, W. C. (2016). Effect of Habitat Diversity on Population Development of the Amazon River Prawn. *Journal of Shellfish Research*, 35(4), 1075-1081. doi:10.2983/035.035.0430
- Sanz-Aguilar, A., Jovani, R., Melián, C. J., Pradel, R., & Tella, J. L. (2015). Multi-event capture–recapture analysis reveals individual foraging specialization in a generalist species. *Ecology*, 96(6), 1650-1660. doi:10.1890/14-0437.1
- Sato, M., Nishijima, S., & Miyashita, T. (2013). Differences in refuge function for prey and tolerance to crayfish among macrophyte species. *Limnology*, 15(1), 27-35. doi:10.1007/s10201-013-0410-3
- Saura-mas, S., & Benejam, L. (2019). Effects of the invasive crayfish *Procambarus clarkii* on growth and development of pelophylax perezi tadpoles in field conditions. *Animal Biodiversity and Conservation*, 42(2), 245-252. doi:10.32800/abc.2019.42.0247
- Scalici, M., Chiesa, S., Scuderi, S., Celauro, D., & Gibertini, G. (2009). Population structure and dynamics of *Procambarus clarkii* (Girard, 1852) in a Mediterranean brackish wetland (Central Italy). *Biological Invasions*, 12(5), 1415-1425. doi:10.1007/s10530-009-9557-6
- Scalici, M., & Gherardi, F. (2007). Structure and dynamics of an invasive population of the red swamp crayfish (*Procambarus clarkii*) in a Mediterranean wetland. *Hydrobiologia*, 583(1), 309-319. doi:10.1007/s10750-007-0615-8
- Scalici, M., Pitzalis, M., & Gibertini, G. (2010). Crayfish distribution updating in central Italy. *Knowledge and Management of Aquatic Ecosystems*, (394-395). doi:10.1051/kmae/2009017
- Schilderman, P. A., Moonen, E. J., Maas, L. M., Welle, I., & Kleinjans, J. C. (1999). Use of crayfish in biomonitoring studies of environmental pollution of the river Meuse. *Ecotoxicol Environ Saf*, 44(3), 241-252. doi:10.1006/eesa.1999.1827



- Si, G., Peng, C., Yuan, J., Xu, X., Zhao, S., Xu, D., & Wu, J. (2017). Changes in soil microbial community composition and organic carbon fractions in an integrated rice-crayfish farming system in subtropical China. *Sci Rep*, 7(1), 2856. doi:10.1038/s41598-017-02984-7
- Silva, G. M. F., Andrade, M. C., Silva, B. R. M., Palheta, I. S., Goncalves, L. B., Rocha, R. M., & Ferreira, M. A. P. (2020). Has a river dam affected the life-history traits of a freshwater prawn? *Ecol Evol*, 10(13), 6536-6548. doi:10.1002/ece3.6388
- Silva, H., & Bueno, S. (2005). Population size estimation of the exotic crayfish *Procambarus clarkii*(Girard) (Crustacea, Decapoda, Cambaridae) in the Alfredo Volpi City Park, Sao Paulo, Brazil. *Revista Brasileira De Zoologia*, 22(1), 93-98.
- Silva, J. N., Oliveira, G. d., & Rocha, S. S. d. (2019). Microhabitat preferences of the freshwater prawn *Macrobrachium jelskii* (Decapoda: Palaemonidae). *Iheringia. Série Zoologia*, 109. doi:10.1590/1678-4766e2019027
- Silva, M., Rosa Filho, J., Azevedo, E., & Lucena-Frédou, F. (2010). Population Dynamics of the River Prawn, *Macrobrachium amazonicum* (Heller, 1862) (Decapoda, Palaemonidae) on Combu Island (Amazon Estuary). *Crustaceana*, 83(3), 277-290. doi:10.1163/001121609x12596543952298
- Silva, R., Jacobucci, G., & Mossolin, E. (2017). Reproductive biology of *Macrobrachium amazonicum* (Heller, 1862) (Decapoda: Palaemonidae) in a reservoir situated in Minas Gerais State, southeastern Brazil. *Latin American Journal of Aquatic Research*, 45(4), 776-786. doi:10.3856/vol45-issue4-fulltext-13
- Silva, T. A. d., Ballester, E. L. C., & Cunico, A. M. (2020). First records of non-native species Malaysian prawn *Macrobrachium rosenbergii* (Decapoda: Palaemonidae) in an important South American hydrographic system. *Acta Limnologica Brasiliensia*, 32. doi:10.1590/s2179-975x8319
- Silva-Junior, E. F., Silva-Araujo, M., & Moulton, T. P. (2017). Distribution and abundance of freshwater decapods in an Atlantic rainforest catchment with a dammed future. *Braz J Biol*, 77(4), 820-829. doi:10.1590/1519-6984.01916
- Silva-Oliveira, G., Ready, J. S., Iketani, G., Bastos, S., Gomes, G., Sampaio, I., & Maciel, C. (2011). The invasive status of *Macrobrachium rosenbergii* (De Man, 1879) in Northern Brazil, with an estimation of areas at risk globally. *Aquatic Invasions*, 6(3), 319-328. doi:10.3391/ai.2011.6.3.08
- Simioni, F., Campos, V. A., Dorado-Rodrigues, T. F., Penha, J., & Strussmann, C. (2014). Crab burrows and termite thermal chimneys as refuges for anurans in a Neotropical wetland. *Salamandra*, 50(3), 133-138.
- Smart, A. C. (2002). Feeding of the exotic Louisiana red swamp crayfish, *Procambarus clarkii* (Crustacea, Decapoda), in an African tropical lake: Lake Naivasha, Kenya. *Hydrobiologia*, 488(1/3), 129-142. doi:10.1023/a:1023326530914
- Smith, R. E., Ahsanullah, M., & Batley, G. E. (1990). Investigations of the impact of effluent from the Ok Tedi copper mine on the fisheries resource in the Fly River, papua new guinea. *Environ Monit Assess*, 14(2-3), 315-331. doi:10.1007/BF00677924

- Soares, M. P., Jesus, F., Almeida, A. R., Domingues, I., Hayd, L., & Soares, A. (2020). Effects of pH and nitrites on the toxicity of a cypermethrin-based pesticide to shrimps. *Chemosphere*, 241, 125089. doi:10.1016/j.chemosphere.2019.125089
- Soares, M. R. d. S., Oshiro, L. M. Y., & Toledo, J. C. (2015). Biologia reprodutiva de *Macrobrachium jelskii* (Crustacea, Decapoda, Palaemonidae) no Rio São Francisco, Minas Gerais, Brasil. *Iheringia. Série Zoologia*, 105(3), 307-315. doi:10.1590/1678-476620151053307315
- Solari, P., Peddio, S., Sollai, G., Masala, C., Podda, C., Frau, G., . . . Crnjar, R. (2018). Development of PVC Dispensers for Long-Lasting Release of Attractants for the Control of Invasive Crayfish Populations. *Diversity*, 10(4). doi:10.3390/d10040128
- Solari, P., Sabatini, A., Masala, C., Palmas, F., Melis, M., Crnjar, R., & Sollai, G. (2015). Sensing with the legs: contribution of pereopods in the detection of food-related compounds in the red swamp crayfish *Procambarus clarkii*. *Journal of Crustacean Biology*, 35(1), 81-87. doi:10.1163/1937240x-00002291
- Sousa, R., Freitas, F. E. P., Mota, M., Nogueira, A. J. A., & Antunes, C. (2013). Invasive dynamics of the crayfish *Procambarus clarkii* (Girard, 1852) in the international section of the River Minho (NW of the Iberian Peninsula). *Aquatic Conservation: Marine and Freshwater Ecosystems*, 23, n/a-n/a. doi:10.1002/aqc.2323
- Sousa, R. T. M. d., Laurentino, I. C., & Corso, G. (2020). Covo Reciclado: Novo Modelo De Armadilha De Pesca Para Minimizar Os Conflitos Entre a Lontra E Os Pescadores. *Holos*, 7, 1-14. doi:10.15628/holos.2020.9353
- South, J., Madzivanzira, T. C., Tshali, N., Measey, J., & Weyl, O. L. F. (2020). In a Pinch: Mechanisms Behind Potential Biotic Resistance Toward Two Invasive Crayfish by Native African Freshwater Crabs. *Frontiers in Ecology and Evolution*, 8. doi:10.3389/fevo.2020.00072
- Souty-Grosset, C., Reynolds, J., Gherardi, F., Aquiloni, L., Coignet, A., Pinet, F., & Mancha Cisneros, M. D. M. (2014). Burrowing activity of the invasive red swamp crayfish, *Procambarus clarkii*, in fishponds of La Brenne (France). *Ethology Ecology & Evolution*, 26(2-3), 263-276. doi:10.1080/03949370.2014.892538
- Storey, A. W., Tenakanai, C. D., Bakowa, K. A., Male, A. Y., Swales, S., & Shore, J. W. (2001). Distribution and reproductive strategies of *Macrobrachium* prawns (Decapoda, Caridea, Palaemonidae) in the Fly River system, Papua New Guinea, with observations on possible mining impacts. *International Association of Theoretical and Applied Limnology - Proceedings*, 27.
- Suarez-Serrano, A., Alcaraz, C., Ibanez, C., Trobajo, R., & Barata, C. (2010). *Procambarus clarkii* as a bioindicator of heavy metal pollution sources in the lower Ebro River and Delta. *Ecotoxicol Environ Saf*, 73(3), 280-286. doi:10.1016/j.ecoenv.2009.11.001
- Sulieman, Y., Pengsakul, T., Guo, Y., Huang, S. Q., & Peng, W. X. (2013). Laboratory and Semi-field Evaluation on the Biological Control of *Oncomelania hupensis* Snail (Gastropoda: Pomatiopsidae), the Intermediate Host of *Schistosoma japonicum*, using

*Procambarus clarkii* crayfish (Crustacea: Cambaridae). Egyptian Journal of Biological Pest Control, 23(2), 215-220.

- Tablado, Z., Tella, J. L., Sanchez-Zapata, J. A., & Hiraldo, F. (2010). The paradox of the long-term positive effects of a North American crayfish on a European community of predators. *Conserv Biol*, 24(5), 1230-1238. doi:10.1111/j.1523-1739.2010.01483.x
- Taddei, F. G., Davanzo, T. M., Castiglioni, L., Herrera, D. R., Fransozo, A., & da Costa, R. C. (2015). Population structure, recruitment, and mortality of the freshwater crab *Dilocarcinus pagei* Stimpson, 1861 (Brachyura, Trichodactylidae) in Southeastern Brazil. *Invertebrate Reproduction & Development*, 59(4), 189-199. doi:10.1080/07924259.2015.1081638
- Taddei, F. G., & Herrera, D. R. (2010). GROWTH OF THE CRAB *Dilocarcinus pagei* Stimpson, 1861 (CRUSTACEA, BRACHYURA, TRICHODACTYLIDAE) IN THE BARRA MANSA DAM, MENDONCA, SP. *Boletim Do Instituto De Pesca*, 36(2), 99-110.
- Taddei, F. G., Herrera, D. R., Davanzo, T. M., Silva, T. E. d., Costa, R. C. d., & Fransozo, A. (2017). Length/weight relationship and condition factor of *Macrobrachium jelskii* (Miers, 1877) and *M. brasiliense* (Heller, 1862) (Decapoda, Palaemonidae) in two locations in the state of São Paulo. *Nauplius*, 25(0). doi:10.1590/2358-2936e2017022
- Taddei, F. G., Reis, S. d. S., David, F. S., Silva, T. E. d., Fransozo, V., & Fransozo, A. (2017). Population structure, mortality, and recruitment of *Macrobrachium amazonicum* (Heller, 1862) (Caridea: Palaemonidae) in the eastern Amazon region, Brazil. *Journal of Crustacean Biology*, 37(2), 131-141. doi:10.1093/jcbiol/rux006
- Tavoloni, T., Stecconi, T., Galarini, R., Bacchiocchi, S., Dorr, A. J. M., Elia, A. C., . . . Piersanti, A. (2021). BFRs (PBDEs and HBCDs) in freshwater species from Lake Trasimeno (Italy): The singular case of HBCDs in red swamp crayfish. *Sci Total Environ*, 758, 143585. doi:10.1016/j.scitotenv.2020.143585
- Taylor, R. C. (1988). Population Dynamics of the Crayfish *Procambarus spiculifer* Observed in Different-Sized Streams in Response to Two Droughts. *Journal of Crustacean Biology*, 8(3). doi:10.2307/1548279
- Taylor, R. C. (1990). Crayfish (*Procambarus spiculifer*) growth rate and final thermal preferendum. *Journal of Thermal Biology*, 15(1), 79-81. doi:10.1016/0306-4565(90)90051-i
- Thanh, N. M., Ponzoni, R. W., Nguyen, N. H., Vu, N. T., Barnes, A., & Mather, P. B. (2009). Evaluation of growth performance in a diallel cross of three strains of giant freshwater prawn (*Macrobrachium rosenbergii*) in Vietnam. *Aquaculture*, 287(1-2), 75-83. doi:10.1016/j.aquaculture.2008.10.051
- Thouvenot, L., Gauzens, B., Haury, J., & Thiebaut, G. (2018). Response of Macrophyte Traits to Herbivory and Neighboring Species: Integration of the Functional Trait Framework in the Context of Ecological Invasions. *Front Plant Sci*, 9, 1981. doi:10.3389/fpls.2018.01981

- Thouvenot, L., Haury, J., Pottier, G., & Thiébaud, G. (2017). Reciprocal indirect facilitation between an invasive macrophyte and an invasive crayfish. *Aquatic Botany*, 139, 1-7. doi:10.1016/j.aquabot.2017.02.002
- Tilmans, M., Mrugala, A., Svoboda, J., Engelsma, M. Y., Petie, M., Soes, D. M., . . . Petrusek, A. (2014). Survey of the crayfish plague pathogen presence in the Netherlands reveals a new *Aphanomyces astaci* carrier. *J Invertebr Pathol*, 120, 74-79. doi:10.1016/j.jip.2014.06.002
- Torres, E., & Álvarez, F. (2012). Genetic variation in native and introduced populations of the red swamp crayfish *Procambarus clarkii* (Girard, 1852) (Crustacea, Decapoda, Cambaridae) in Mexico and Costa Rica. *Aquatic Invasions*, 7(2), 235-241. doi:10.3391/ai.2012.7.2.009
- Tréguier, A., Paillisson, J.-M., Dejean, T., Valentini, A., Schlaepfer, M. A., Roussel, J.-M., & Crispo, E. (2014). Environmental DNA surveillance for invertebrate species: advantages and technical limitations to detect invasive crayfish *Procambarus clarkii* in freshwater ponds. *Journal of Applied Ecology*, 51(4), 871-879. doi:10.1111/1365-2664.12262
- Treguier, A., Roussel, J. M., Schlaepfer, M. A., & Paillisson, J. M. (2011). Landscape features correlate with spatial distribution of red-swamp crayfish *Procambarus clarkii* in a network of ponds. *Knowledge and Management of Aquatic Ecosystems*, (401). doi:10.1051/kmae/2011035
- Tréguier, A., Roussel, J.-M., Bélouard, N., & Paillisson, J.-M. (2018). Is it a hindrance for an invasive aquatic species to spread across scattered habitat patches? *Aquatic Conservation: Marine and Freshwater Ecosystems*, 28(3), 610-618. doi:10.1002/aqc.2887
- Turner, H. M. (2006). Distribution and Prevalence of *Alloccorrigia filiformis* (Trematoda: Dicrocoeliidae), a Parasite of the Crayfish *Procambarus clarkii*, Within the State of Louisiana and the Lower Mississippi River Valley, U.S.A. *Comparative Parasitology*, 73(2), 274-278. doi:10.1654/4213.1
- Urbano, T., Silva-A, A., Medina, L., Moreno, C., Guevara, M., & Graziani, C. (2010). Growth of freshwater shrimp *Macrobrachium jelskii* (Miers, 1877), in ponds. *Zootechnia Tropical*, 28(2), 163-171.
- Urzúa, Á., & Anger, K. (2011). Larval biomass and chemical composition at hatching in two geographically isolated clades of the shrimp *Macrobrachium amazonicum*: intra- or interspecific variation? *Invertebrate Reproduction & Development*, 55(4), 236-246. doi:10.1080/07924259.2011.576155
- Valencia, D., & Campos, M. (2010). FRESHWATER SHRIMPS OF THE COLOMBIAN TRIBUTARIES OF THE AMAZON AND ORINOCO RIVERS (PALAEMONIDAE, EURYRHYNCHIDAE, SERGESTIDAE). *Caldasia*, 32(1).
- Valgas, A. A. N., Wingen, N. M. A., Santos, S. H. D., Oliveira, G. T., & Araujo, P. B. (2020). Biochemical-functional parameters of red swamp crayfish *Procambarus clarkii* (Girard, 1852) Crustacea, Cambaridae female throughout a seasonal cycle in southeast Brazil. *Marine and Freshwater Behaviour and Physiology*, 53(3), 113-129. doi:10.1080/10236244.2020.1777864

- van der Wal, J. E., Dorenbosch, M., Immers, A. K., Vidal Forteza, C., Geurts, J. J., Peeters, E. T., . . . Bakker, E. S. (2013). Invasive crayfish threaten the development of submerged macrophytes in lake restoration. *PLoS One*, 8(10), e78579. doi:10.1371/journal.pone.0078579
- Vannini, A., Bruni, G., Cantini, M., Tricarico, E., & Inghilesi, A. F. (2015). Updating the distribution of the American bullfrog *Lithobates catesbeianus* (Anura: Ranidae) in Tuscany (Central Italy), with a note on predatory interactions with red swamp crayfish *Procambarus clarkii* (Decapoda: Cambaridae). *Italian Journal of Zoology*, 82(3), 416-424. doi:10.1080/11250003.2015.1020348
- Vasquez-R, J. M., & Bocanegra-M, J. S. (2019). Aspectos ecológicos de decápodos del río Guayuriba (Meta, Colombia). *Caldasia*, 41(2), 392-403. doi:10.15446/caldasia.v41n2.69544
- Vedia, I., Galicia, D., Baquero, E., Oscoz, J., & Miranda, R. (2017). Environmental factors influencing the distribution and abundance of the introduced signal crayfish in the north of Iberian Peninsula. *Marine and Freshwater Research*, 68(5). doi:10.1071/mf16020
- Vedia, I., Oscoz, J., Rueda, J., Miranda, R., García-Roger, E., Baquero, E., & Gelder, S. (2015). An alien ectosymbiotic branchiobdellidan (Annelida: Clitellata) adopting exotic crayfish: a biological co-invasion with unpredictable consequences. *Inland Waters*, 5(1), 89-92. doi:10.5268/iw-5.1.799
- Ventura, E., Winick-Silva, A., & Shinozaki-Mendes, R. A. (2019). Ovarian development and spawning of *Macrobrachium amazonicum* (Crustacea, Decapoda). *Iheringia. Série Zoologia*, 109. doi:10.1590/1678-4766e2019026
- Vera-Silva, A. L., Carvalho, F. L., & Mantelatto, F. L. (2017). Redescription of the freshwater shrimp *Macrobrachium jelskii* (Miers, 1877) (Caridea, Palaemonidae). *Zootaxa*, 4269(1), 44-60. doi:10.11646/zootaxa.4269.1.2
- Vera-Silva, Ana L., Mantelatto, Fernando L., & Carvalho, Fabrício L. (2016). Distribution and genetic differentiation of *Macrobrachium jelskii* (Miers, 1877) (Natantia: Palaemonidae) in Brazil reveal evidence of non-natural introduction and cryptic allopatric speciation. *Journal of Crustacean Biology*, 36(3), 373-383. doi:10.1163/1937240x-00002425
- Vergamini, F. G., Pileggi, L. G., Mantelatto, F. L., & Vonk, R. (2011). Genetic variability of the Amazon River prawn *Macrobrachium amazonicum* (Decapoda, Caridea, Palaemonidae). *Contributions to Zoology*, 80(1), 67-83. doi:10.1163/18759866-08001003
- Vesely, L., Ruokonen, T. J., Weiperth, A., Kubec, J., Szajbert, B., Guo, W., . . . Kouba, A. (2021). Trophic niches of three sympatric invasive crayfish of EU concern. *Hydrobiologia*, 848(3), 727-737. doi:10.1007/s10750-020-04479-5
- Vidotto Barboza Lima, A., Guerra, A. L., Alves de Almeida, E., Gazzi Taddei, F., & Castiglioni, L. (2013). Characterization of esterase patterns in hepatopancreas of three species of *Macrobrachium* (Palaemonidae). *Biochemical Systematics and Ecology*, 47, 132-138. doi:10.1016/j.bse.2012.10.006

- Vieira, Rony R. R., Rieger, Paulo J., Cichowski, V., & Pinheiro, Marcelo A. A. (2013). Juvenile development of *Dilocarcinus pagei* Stimpson, 1861 (Brachyura, Trichodactylidae) reared in the laboratory, with emphasis on setae morphology. *Crustaceana*, 86(13-14), 1644-1663. doi:10.1163/15685403-00003247
- Villalobos-Hiriart, J. L., Álvarez, F., Hernández, C., De La Lanza-Espino, G., & González-Mora, I. D. (2010). Decapod crustaceans from Copalita, Zimatán and Coyula basins, in Oaxaca, Mexico. *Revista Mexicana De Biodiversidad*, 81(SUPPL.), S99-S111.
- Vioque-Fernandez, A., Alves de Almeida, E., & Lopez-Barea, J. (2009). Assessment of Donana National Park contamination in *Procambarus clarkii*: integration of conventional biomarkers and proteomic approaches. *Sci Total Environ*, 407(5), 1784-1797. doi:10.1016/j.scitotenv.2008.11.051
- Vioque-Fernandez, A., de Almeida, E. A., Ballesteros, J., Garcia-Barrera, T., Gomez-Ariza, J. L., & Lopez-Barea, J. (2007). Donana National Park survey using crayfish (*Procambarus clarkii*) as bioindicator: esterase inhibition and pollutant levels. *Toxicol Lett*, 168(3), 260-268. doi:10.1016/j.toxlet.2006.10.023
- Vodovsky, N., Patoka, J., & Kouba, A. (2017). Ecosystem of Caspian Sea threatened by pet-traded non-indigenous crayfish. *Biological Invasions*, 19(7), 2207-2217. doi:10.1007/s10530-017-1433-1
- Wahidah, Amrullah, Dahlia, & Idris, A. P. S. (2018). Left-right asymmetry in the giant freshwater prawn population of Sulawesi. *AACL Bioflux*, 11(1), 221-225.
- Wahidah, Andy Omar, S. B., Trijuno, D. D., Nugroho, E., & Amrullah. (2017). The morphological characteristics of south Sulawesi's giant freshwater prawn *Macrobrachium rosenbergii*. *AACL Bioflux*, 10(4), 820-829.
- Wahidah, & Yusuf, M. (2017). Edible trait of giant freshwater prawn *Macrobrachium rosenbergii* of Kariango river population in Pinrang Regency, Indonesia. *AACL Bioflux*, 10(6), 1499-1505.
- Walker, I. (1992). Life history traits of shrimps (Decapoda: Palaemonidae) of Amazonian inland waters and their Phylogenetic interpretation. *Studies on Neotropical Fauna and Environment*, 27(2-3), 131-143. doi:10.1080/01650529209360873
- Wang, C., & Cheng, Y. X. (2010). Mating capacity of male *Macrobrachium rosenbergii* with different morphotypes. *Chinese Journal of Applied Ecology*, 21(4), 1043-1048.
- Weber, S., & Traunspurger, W. (2017). Invasive red swamp crayfish (*Procambarus clarkii*) and native noble crayfish (*Astacus astacus*) similarly reduce oligochaetes, epipelic algae, and meiofauna biomass: a microcosm study. *Freshwater Science*, 36(1), 103-112. doi:10.1086/690556
- Weihrauch, D., McNamara, J. C., Towle, D. W., & Onken, H. (2003). The gills of the red freshwater crab *Dilocarcinus pagei*: Microanatomy, ion-motive ATPases and NaCl absorption. *Integrative and Comparative Biology*, 43(6), 1044-1044.

- Weiperth, A., Bláha, M., Szajbert, B., Seprős, R., Bányai, Z., Patoka, J., & Kouba, A. (2020). Hungary: a European hotspot of non-native crayfish biodiversity. *Knowledge & Management of Aquatic Ecosystems*, (421). doi:10.1051/kmae/2020035
- Weiss, R., Anger, K., Hayd, L., & Schubart, C. D. (2015). Interpreting genetic distances for species recognition: the case of *Macrobrachium amazonicum* Heller, 1862 and the recently described *M. pantanalense* Dos Santos, Hayd & Anger, 2013 (Decapoda, Palaemonidae) from Brazilian fresh waters. *Crustaceana*, 88(10-11), 1111-1126. doi:10.1163/15685403-00003471
- Williner, V., & Collins, P. (2002). Spatial and temporal variation in the activity of freshwater prawn *Macrobrachium jelskii* (Miers, 1877) (Crustacea, Decapoda, Caridea, Palaemonidae). *Ecologia Austral*, 12(1), 3-10.
- Wiśniewski, K., Szarmach, D., & Poznańska-Kakareko, M. (2020). The role of abiotic and biotic factors in interspecific competition of Polish crayfish – comprehensive literature review. *Oceanological and Hydrobiological Studies*, 49(4), 428-441. doi:10.1515/ohs-2020-0038
- Wowor, D., & Choy, S. C. (2001). The freshwater prawns of the genus *Macrobrachium* Bate, 1868 (Crustacea : Decapoda : Palaemonidae) from Brunei Darussalam. *Raffles Bulletin of Zoology*, 49(2), 269-289.
- Wroten, J. W., & Clark, W. H. (1978). First Record of the Crayfish, *Procambarus clarkii*, From Idaho, U.S.a. (Decapoda, Cambaridae). *Crustaceana*, 35(3), 317-319. doi:10.1163/156854078x00493
- Wylie, G. D., Casazza, M. L., & Carpenter, M. (2003). Diet of bullfrogs in relation to predation on giant garter snakes at Colusa National Wildlife Refuge. *California Fish and Game*, 89(3), 139-145.
- Yamamoto, Y. (2010). Contribution of bioturbation by the red swamp crayfish *Procambarus clarkii* to the recruitment of bloom-forming cyanobacteria from sediment. *Journal of Limnology*, 69(1). doi:10.4081/jlimnol.2010.102
- Yang, Q., Ai, X., Dong, J., Liu, Y., Zhou, S., Yang, Y., & Xu, N. (2021). A QuEChERS-HPLC-MS/MS Method with Matrix Matching Calibration Strategy for Determination of Imidacloprid and Its Metabolites in *Procambarus clarkii* (Crayfish) Tissues. *Molecules*, 26(2). doi:10.3390/molecules26020274
- Yi, S., Li, Y., Shi, L., Zhang, L., Li, Q., & Chen, J. (2018). Characterization of Population Genetic Structure of red swamp crayfish, *Procambarus clarkii*, in China. *Sci Rep*, 8(1), 5586. doi:10.1038/s41598-018-23986-z
- Yi, S., Zhang, L., Li, Y., Shi, L., Chen, J., Wang, W., . . . He, J. (2020). Genetic diversity and phenotypic variation of the red swamp crayfish, *Procambarus clarkii* (Girard, 1852) (Decapoda: Astacidea: Astacidae), in China. *Journal of Crustacean Biology*, 40(5), 574-583. doi:10.1093/jcbiol/ruaa055
- Yoshida, C. E., & Uieda, V. S. (2014). The importance of a Biosphere Reserve of Atlantic Forest for the conservation of stream fauna/A importância de uma Reserva da Biosfera

da Mata Atlântica para a Conservação da Fauna de Riachos. *Brazilian Journal of Biology*, 74(2), 382-394.

- Yu, J., Ren, Y., Xu, T., Li, W., Xiong, M., Zhang, T., . . . Liu, J. (2018). Physicochemical water quality parameters in typical rice-crayfish integrated systems (RCIS) in China. *International Journal of Agricultural and Biological Engineering*, 11(3), 54-60. doi:10.25165/ijabe.20181103.3761
- Yu, L., Zhu, X., Liang, J., Fan, J., & Chen, C. (2019). Analysis of Genetic Structure of Wild and Cultured Giant Freshwater Prawn (*Macrobrachium rosenbergii*) Using Newly Developed Microsatellite. *Frontiers in Marine Science*, 6. doi:10.3389/fmars.2019.00323
- Yue, G. H., Li, J., Bai, Z., Wang, C. M., & Feng, F. (2010). Genetic diversity and population structure of the invasive alien red swamp crayfish. *Biological Invasions*, 12(8), 2697-2706. doi:10.1007/s10530-009-9675-1
- Yue, G. H., Li, J. L., Wang, C. M., Xia, J. H., Wang, G. L., & Feng, J. B. (2010). High prevalence of multiple paternity in the invasive crayfish species, *Procambarus clarkii*. *Int J Biol Sci*, 6(1), 107-115. doi:10.7150/ijbs.6.107
- Yue, G. H., Wang, G. L., Zhu, B. Q., Wang, C. M., Zhu, Z. Y., & Lo, L. C. (2008). Discovery of four natural clones in a crayfish species *Procambarus clarkii*. *Int J Biol Sci*, 4(5), 279-282. doi:10.7150/ijbs.4.279
- Zanotto, F. P., Wheatly, M. G., Reiber, C. L., Gannon, A. T., & Jalles-Filho, E. (2004). Allometric relationship of postmolt net ion uptake, ventilation, and circulation in the freshwater crayfish *Procambarus clarkii*: intraspecific scaling. *Physiol Biochem Zool*, 77(2), 275-284. doi:10.1086/378924
- Zhang, Z., Liu, J., Jin, X., Liu, C., Fan, C., Guo, L., . . . Peng, N. (2020). Developmental, Dietary, and Geographical Impacts on Gut Microbiota of Red Swamp Crayfish (*Procambarus clarkii*). *Microorganisms*, 8(9). doi:10.3390/microorganisms8091376
- Zhu, B. F., Huang, Y., Dai, Y. G., Bi, C. W., & Hu, C. Y. (2013). Genetic diversity among red swamp crayfish (*Procambarus clarkii*) populations in the middle and lower reaches of the Yangtze River based on AFLP markers. *Genet Mol Res*, 12(1), 791-800. doi:10.4238/2013.March.13.8
