# Supplementary material
Source: MDPI journal article supplement (https://www.mdpi.com/1424-2818/15/7/841)
Supplement: s1 [file s1]

**Supplementary Table S2:** Predictor variables list, extracted from WorldClim and EarthEnv databases. Highlighted with an X are the variables selected through the Variance Inflation Factor (VIF) for each species. *P. clarkii* = *Procambarus clarkii*, *D. pagei* = *Dilocarcinus pagei*, *M. rosenbergii* = *Macrobrachium rosenbergii*, *M. jelskii* = *Macrobrachium jelskii*, *M. amazonicum* = *Macrobrachium amazonicum*. [double column]

| Variable | Description                         | <i>M. rosenbergii</i> | <i>M. jelskii</i> | <i>M. amazonicum</i> | <i>P. clarkii</i> | <i>D. pagei</i> |
|----------|-------------------------------------|-----------------------|-------------------|----------------------|-------------------|-----------------|
| Bio1     | Annual Mean Temperature             |                       |                   |                      |                   |                 |
| Bio2     | Mean Diurnal Range                  |                       |                   |                      | X                 |                 |
| Bio3     | Isothermality                       |                       | X                 |                      |                   |                 |
| Bio4     | Temperature Seasonality             |                       |                   | X                    |                   | X               |
| Bio5     | Max Temperature of Warmest Month    | X                     |                   |                      | X                 |                 |
| Bio6     | Min Temperature of Coldest Month    |                       |                   |                      |                   |                 |
| Bio7     | Temperature Annual Range            |                       |                   |                      |                   |                 |
| Bio8     | Mean Temperature of Wettest Quarter |                       |                   |                      | X                 | X               |
| Bio9     | Mean Temperature of Driest Quarter  | X                     | X                 |                      | X                 |                 |
| Bio10    | Mean Temperature of Warmest Quarter |                       |                   |                      |                   |                 |
| Bio11    | Mean Temperature of Coldest Quarter |                       |                   |                      |                   |                 |
| Bio12    | Annual Precipitation                |                       |                   |                      |                   |                 |
| Bio13    | Precipitation of Wettest Month      | X                     | X                 |                      | X                 |                 |
| Bio14    | Precipitation of Driest Month       | X                     | X                 | X                    |                   |                 |
| Bio15    | Precipitation Seasonality           |                       |                   | X                    |                   | X               |
| Bio16    | Precipitation of Wettest Quarter    |                       |                   |                      |                   |                 |
| Bio17    | Precipitation of Driest Quarter     |                       |                   |                      |                   |                 |
| Bio18    | Precipitation of Warmest Quarter    | X                     | X                 | X                    |                   | X               |
| Bio19    | Precipitation of Coldest Quarter    | X                     |                   |                      |                   |                 |

| Variable         | Description                            | <i>M. rosenbergii</i> | <i>M. jelskii</i> | <i>M. amazonicum</i> | <i>P. clarkii</i> | <i>D. pagei</i> |
|------------------|----------------------------------------|-----------------------|-------------------|----------------------|-------------------|-----------------|
| <i>EarthEnvi</i> |                                        |                       |                   |                      |                   |                 |
| Prec1            | Sum of monthly precipitation January   | X                     |                   |                      |                   |                 |
| Prec2            | Sum of monthly precipitation February  |                       |                   | X                    | X                 |                 |
| Prec3            | Sum of monthly precipitation March     |                       | X                 |                      |                   |                 |
| Prec4            | Sum of monthly precipitation April     | X                     |                   |                      | X                 |                 |
| Prec5            | Sum of monthly precipitation May       | X                     | X                 |                      |                   |                 |
| Prec6            | Sum of monthly precipitation June      |                       |                   |                      |                   |                 |
| Prec7            | Sum of monthly precipitation July      |                       |                   |                      | X                 |                 |
| Prec8            | Sum of monthly precipitation August    |                       |                   |                      |                   |                 |
| Prec9            | Sum of monthly precipitation September | X                     |                   | X                    |                   | X               |
| Prec10           | Sum of monthly precipitation October   |                       |                   |                      |                   | X               |
| Prec11           | Sum of monthly precipitation November  | X                     | X                 | X                    | X                 | X               |
| Prec12           | Sum of monthly precipitation December  |                       |                   |                      |                   |                 |
| Hydro1           | Annual Mean Temperature                |                       |                   |                      |                   |                 |
| Hydro2           | Mean Diurnal Range                     | X                     | X                 | X                    | X                 |                 |
| Hydro3           | Isothermality                          |                       |                   |                      |                   |                 |
| Hydro4           | Temperature Seasonality                |                       |                   |                      |                   |                 |
| Hydro5           | Max Temperature of Warmest Month       |                       |                   |                      |                   |                 |
| Hydro6           | Min Temperature of Coldest Month       |                       |                   |                      | X                 |                 |
| Hydro7           | Temperature Annual Range               |                       |                   |                      |                   |                 |
| Hydro8           | Mean Temperature of Wettest Quarter    |                       | X                 | X                    |                   |                 |
| Hydro9           | Mean Temperature of Driest Quarter     |                       |                   |                      |                   |                 |
| Hydro10          | Mean Temperature of Warmest Quarter    |                       |                   |                      |                   |                 |
| Hydro11          | Mean Temperature of Coldest Quarter    |                       |                   |                      |                   |                 |
| Hydro12          | Annual Precipitation                   |                       |                   |                      |                   |                 |

| Variable | Description                             | <i>M. rosenbergii</i> | <i>M. jelskii</i> | <i>M. amazonicum</i> | <i>P. clarkii</i> | <i>D. pagei</i> |
|----------|-----------------------------------------|-----------------------|-------------------|----------------------|-------------------|-----------------|
| Hydro13  | Precipitation of Wettest Month          |                       | X                 |                      |                   |                 |
| Hydro14  | Precipitation of Driest Month           | X                     | X                 | X                    |                   |                 |
| Hydro15  | Precipitation Seasonality               |                       |                   |                      |                   |                 |
| Hydro16  | Precipitation of Wettest Quarter        |                       |                   |                      |                   |                 |
| Hydro17  | Precipitation of Driest Quarter         |                       |                   |                      |                   |                 |
| Hydro18  | Precipitation of Warmest Quarter        | X                     |                   |                      |                   |                 |
| Hydro19  | Precipitation of Coldest Quarter        |                       |                   |                      | X                 |                 |
| Elev1    | Minimum elevation                       | X                     | X                 | X                    | X                 |                 |
| Elev2    | Maximum elevation                       |                       |                   |                      |                   |                 |
| Elev3    | Elevation range                         |                       | X                 | X                    | X                 |                 |
| Elev4    | Average Elevation                       |                       |                   |                      |                   |                 |
| Slope1   | Minimum slope                           | X                     |                   | X                    | X                 | X               |
| Slope2   | Maximum slope                           |                       |                   |                      |                   |                 |
| Slope3   | Slope range                             | X                     |                   |                      |                   | X               |
| Slope4   | Average slope                           | X                     |                   |                      | X                 | X               |
| Flow1    | Number of upstream stream grid cells    |                       |                   |                      |                   |                 |
| Flow2    | Number of upstream catchment grid cells |                       |                   |                      |                   |                 |
