# Supplementary material
Source: MDPI journal article supplement (https://www.mdpi.com/1424-2818/15/7/841)
Supplement: s1 [file s1]

Archive with 5 entries (5 files):
- Supplementary Figure S1_Flowchart of the PRISMA Matrix referring to the systematic literature review process.pdf
- Supplementary Figure S2_Occurrence maps of species obtained by the systematic review and by the Global Biodiversity Information Facility (GBIF) database.pdf
- Supplementary Table S1_Papers list resulting from the systematic review.pdf
- Supplementary Table S2_Predictor variables list, extracted from WorldClim and EarthEnv databases.pdf
- Supplementary Table S3_Area of suitability which overlap the hydrographic basins a.pdf
