# Supplementary material
Source: MDPI journal article supplement (https://www.mdpi.com/1424-2818/15/7/841)
Supplement: s1 [file s1 › Supplementary Table S3_Area of suitability which overlap the hydrographic basins a.pdf]

**Supplementary Table S3:** Area of suitability greater than 75% of the species *Dilocarcinus pagei*, *Macrobrachium amazonicum*, *Macrobrachium jelskii*, *Macrobrachium rosenbergii* and *Procambarus clarkii*, which overlap the hydrographic basins and Protected Areas in South America.

Legend: ARG: Argentina; BOL: Bolivia; BRA: Brazil; CHL: Chile; COL: Colombia; ECU: Ecuador; GUF: French Guiana; GUY: Guyana; PER:

Peru; PRY: Paraguay; SUR: Suriname; URY: Uruguay; VEN: Venezuela. In bold native region of the species. [double column]

| ID | Species                   | Protect Areas                             | Country | Area (Km <sup>2</sup> ) | Basin    |
|----|---------------------------|-------------------------------------------|---------|-------------------------|----------|
| 1  | <i>Dilocarcinus pagei</i> | San Matías                                | BOL     | 14,302.72               | La Plata |
| 2  | <i>Dilocarcinus pagei</i> | Otuquis                                   | BOL     | 2,606.72                | La Plata |
| 3  | <i>Dilocarcinus pagei</i> | Pacaas Novas                              | BRA     | 1,291.05                | Amazon   |
| 4  | <i>Dilocarcinus pagei</i> | Pantanal Conservation Complex             | BRA     | 1,222.64                | La Plata |
| 5  | <i>Dilocarcinus pagei</i> | Parque Nacional Do Pantanal Matogrossense | BRA     | 1,054.03                | La Plata |
| 6  | <i>Dilocarcinus pagei</i> | Pantanal Matogrossense                    | BRA     | 828.15                  | La Plata |
| 7  | <i>Dilocarcinus pagei</i> | Reserva Extrativista Rio Pacaás Novos     | BRA     | 607.01                  | Amazon   |
| 8  | <i>Dilocarcinus pagei</i> | Rio Negro                                 | PRY     | 497.73                  | La Plata |
| 9  | <i>Dilocarcinus pagei</i> | Noel Kempff Mercado National Park         | BOL     | 437.29                  | Amazon   |
| 10 | <i>Dilocarcinus pagei</i> | Noel Kempff Mercado                       | BOL     | 437.29                  | Amazon   |

|    |                           |                                                          |     |        |                                                  |
|----|---------------------------|----------------------------------------------------------|-----|--------|--------------------------------------------------|
| 11 | <i>Dilocarcinus pagei</i> | Parque Nacional Do Cabo Orange                           | BRA | 341.38 | Northeast South America,<br>South Atlantic Coast |
| 12 | <i>Dilocarcinus pagei</i> | Área De Proteção Ambiental Ilhas E Várzeas Do Rio Paraná | BRA | 285.50 | La Plata                                         |
| 13 | <i>Dilocarcinus pagei</i> | Parque Nacional Rio Pilcomayo                            | ARG | 271.28 | La Plata                                         |
| 14 | <i>Dilocarcinus pagei</i> | Río Pilcomayo                                            | ARG | 270.92 | La Plata                                         |
| 15 | <i>Dilocarcinus pagei</i> | Área De Proteção Ambiental Nhamundá                      | BRA | 237.86 | Amazon                                           |
| 16 | <i>Dilocarcinus pagei</i> | Rio Guaporé                                              | BRA | 208.44 | Amazon                                           |
| 17 | <i>Dilocarcinus pagei</i> | Estación Biológica Beni                                  | BOL | 204.51 | Amazon                                           |
| 18 | <i>Dilocarcinus pagei</i> | Estación Biológica del Beni                              | BOL | 204.51 | Amazon                                           |
| 19 | <i>Dilocarcinus pagei</i> | Estero Milagro                                           | PRY | 204.27 | La Plata                                         |
| 20 | <i>Dilocarcinus pagei</i> | Estação Ecológica De Taiamã                              | BRA | 115.55 | La Plata                                         |
| 21 | <i>Dilocarcinus pagei</i> | Perigara                                                 | BRA | 97.46  | La Plata                                         |
| 22 | <i>Dilocarcinus pagei</i> | Chaco                                                    | ARG | 91.94  | La Plata                                         |
| 23 | <i>Dilocarcinus pagei</i> | Lago Ypacarai                                            | PRY | 91.20  | La Plata                                         |
| 24 | <i>Dilocarcinus pagei</i> | Amboró                                                   | BOL | 81.04  | Amazon                                           |
| 25 | <i>Dilocarcinus pagei</i> | Reserva Extrativista Rio Ouro Preto                      | BRA | 74.23  | Amazon                                           |

|    |                           |                                                             |     |       |                                                  |
|----|---------------------------|-------------------------------------------------------------|-----|-------|--------------------------------------------------|
| 26 | <i>Dilocarcinus pagei</i> | Kaboeri Kreek                                               | SUR | 43.35 | Northeast South America,<br>South Atlantic Coast |
| 27 | <i>Dilocarcinus pagei</i> | Sagarana                                                    | BRA | 39.94 | Amazon                                           |
| 28 | <i>Dilocarcinus pagei</i> | Rio Negro Ocaia                                             | BRA | 38.84 | Amazon                                           |
| 29 | <i>Dilocarcinus pagei</i> | Reserva Extrativista Rio Cautário                           | BRA | 37.24 | Amazon                                           |
| 30 | <i>Dilocarcinus pagei</i> | Pilón Lajas                                                 | BOL | 31.78 | Amazon                                           |
| 31 | <i>Dilocarcinus pagei</i> | Parque Nacional Restinga De Jurubatiba                      | BRA | 31.54 | Uruguay - Brazil, South<br>Atlantic Coast        |
| 32 | <i>Dilocarcinus pagei</i> | Floresta Nacional De Tapajós                                | BRA | 30.50 | Amazon                                           |
| 33 | <i>Dilocarcinus pagei</i> | Reserva Biológica Traçadal                                  | BRA | 25.70 | Amazon                                           |
| 34 | <i>Dilocarcinus pagei</i> | Parque Nacional Pílón-Lajas                                 | BOL | 25.50 | Amazon                                           |
| 35 | <i>Dilocarcinus pagei</i> | Parque Estadual De Porto Ferreira                           | BRA | 6.05  | La Plata                                         |
| 36 | <i>Dilocarcinus pagei</i> | Estação Ecológica Jataí                                     | BRA | 5.08  | La Plata                                         |
| 37 | <i>Dilocarcinus pagei</i> | Estação Ecológica De Paulo De Faria                         | BRA | 4.37  | La Plata                                         |
| 38 | <i>Dilocarcinus pagei</i> | Del Medio - Los Caballos                                    | ARG | 2.41  | La Plata                                         |
| 39 | <i>Dilocarcinus pagei</i> | Área De Relevante Interesse Ecológica Mata De Santa Genebra | BRA | 2.34  | La Plata                                         |
| 40 | <i>Dilocarcinus pagei</i> | Pre-Delta                                                   | ARG | 1.80  | La Plata                                         |

|    |                                 |                                                           |     |          |          |
|----|---------------------------------|-----------------------------------------------------------|-----|----------|----------|
| 41 | <i>Dilocarcinus pagei</i>       | Área De Relevante Interesse Ecológica Matão De Cosmópolis | BRA | 1.73     | La Plata |
| 42 | <i>Dilocarcinus pagei</i>       | Parque Estadual De Ibiporã                                | BRA | 0.74     | La Plata |
| 43 | <i>Macrobrachium amazonicum</i> | San Matías                                                | BOL | 6,199.26 | La Plata |
| 44 | <i>Macrobrachium amazonicum</i> | Caura                                                     | VEN | 3,351.31 | Orinoco  |
| 45 | <i>Macrobrachium amazonicum</i> | Sipapo                                                    | VEN | 2,914.13 | Orinoco  |
| 46 | <i>Macrobrachium amazonicum</i> | Área De Proteção Ambiental Ilhas E Várzeas Do Rio Paraná  | BRA | 2,525.14 | La Plata |
| 47 | <i>Macrobrachium amazonicum</i> | Área De Proteção Ambiental Nhamundá                       | BRA | 1,428.62 | Amazon   |
| 48 | <i>Macrobrachium amazonicum</i> | Pantanal Conservation Complex                             | BRA | 1,371.84 | La Plata |
| 49 | <i>Macrobrachium amazonicum</i> | Sierra de la Macarena                                     | COL | 1,304.77 | Orinoco  |
| 50 | <i>Macrobrachium amazonicum</i> | Manuripi                                                  | BOL | 1,253.32 | Amazon   |
| 51 | <i>Macrobrachium amazonicum</i> | Reserva Extrativista Rio Cajari                           | BRA | 1,244.30 | Amazon   |
| 52 | <i>Macrobrachium amazonicum</i> | Parque Nacional Do Pantanal Matogrossense                 | BRA | 1,065.04 | La Plata |
| 53 | <i>Macrobrachium amazonicum</i> | Reserva Biológica Do Rio Trombetas                        | BRA | 1,048.54 | Amazon   |
| 54 | <i>Macrobrachium amazonicum</i> | Floresta Nacional De Saracá-Taquera                       | BRA | 846.35   | Amazon   |
| 55 | <i>Macrobrachium amazonicum</i> | Pantanal Matogrossense                                    | BRA | 828.15   | La Plata |

|    |                                 |                                                         |     |        |                                               |
|----|---------------------------------|---------------------------------------------------------|-----|--------|-----------------------------------------------|
| 56 | <i>Macrobrachium amazonicum</i> | Reserva de Biosfera El Tuparro                          | COL | 823.24 | Orinoco                                       |
| 57 | <i>Macrobrachium amazonicum</i> | Parque Nacional De Anavilhanas                          | BRA | 689.84 | Amazon                                        |
| 58 | <i>Macrobrachium amazonicum</i> | Área De Proteção Ambiental Das Reentrâncias Maranhenses | BRA | 650.07 | North Brazil, South Atlantic Coast            |
| 59 | <i>Macrobrachium amazonicum</i> | Reserva Biológica Do Lago Piratuba                      | BRA | 642.23 | Northeast South America, South Atlantic Coast |
| 60 | <i>Macrobrachium amazonicum</i> | Central Amazon Conservation Complex                     | BRA | 639.89 | Amazon                                        |
| 61 | <i>Macrobrachium amazonicum</i> | Reentrancias Maranhenses                                | BRA | 620.82 | North Brazil, South Atlantic Coast            |
| 62 | <i>Macrobrachium amazonicum</i> | Floresta Nacional De Tapajós                            | BRA | 579.90 | Amazon                                        |
| 63 | <i>Macrobrachium amazonicum</i> | Otuquis                                                 | BOL | 576.76 | La Plata                                      |
| 64 | <i>Macrobrachium amazonicum</i> | Amboró                                                  | BOL | 544.50 | Amazon                                        |
| 65 | <i>Macrobrachium amazonicum</i> | El Tuparro                                              | COL | 476.78 | Orinoco                                       |
| 66 | <i>Macrobrachium amazonicum</i> | Parque Nacional Pilon-Lajas                             | BOL | 474.40 | Amazon                                        |
| 67 | <i>Macrobrachium amazonicum</i> | Pilon Lajas                                             | BOL | 474.40 | Amazon                                        |
| 68 | <i>Macrobrachium amazonicum</i> | Santos Luzardo                                          | VEN | 468.28 | Orinoco                                       |
| 69 | <i>Macrobrachium amazonicum</i> | Atlantic Forest Southeast Reserves                      | BRA | 398.37 | Uruguay - Brazil, South Atlantic Coast        |
| 70 | <i>Macrobrachium amazonicum</i> | Parque Nacional Do Cabo Orange                          | BRA | 389.81 | Northeast South America, South Atlantic Coast |

|    |                                 |                                                         |     |        |                                                  |
|----|---------------------------------|---------------------------------------------------------|-----|--------|--------------------------------------------------|
| 71 | <i>Macrobrachium amazonicum</i> | Área De Proteção Ambiental Serra Da Ibiapaba            | BRA | 345.73 | Parnaíba                                         |
| 72 | <i>Macrobrachium amazonicum</i> | Sierra Maigualida                                       | VEN | 339.94 | Orinoco                                          |
| 73 | <i>Macrobrachium amazonicum</i> | Uaçã                                                    | BRA | 334.64 | Northeast South America,<br>South Atlantic Coast |
| 74 | <i>Macrobrachium amazonicum</i> | Floresta Nacional De Caxiuanã                           | BRA | 330.83 | Tocantins                                        |
| 75 | <i>Macrobrachium amazonicum</i> | Área De Proteção Ambiental De Petrópolis                | BRA | 287.85 | Uruguay - Brazil, South<br>Atlantic Coast        |
| 76 | <i>Macrobrachium amazonicum</i> | Pacaas Novas                                            | BRA | 261.85 | Amazon                                           |
| 77 | <i>Macrobrachium amazonicum</i> | Jumina                                                  | BRA | 244.49 | Northeast South America,<br>South Atlantic Coast |
| 78 | <i>Macrobrachium amazonicum</i> | Parque Estadual Do Morro Do Diabo                       | BRA | 244.11 | La Plata                                         |
| 79 | <i>Macrobrachium amazonicum</i> | Reserva Biológica Do Tinguá                             | BRA | 234.32 | Uruguay - Brazil, South<br>Atlantic Coast        |
| 80 | <i>Macrobrachium amazonicum</i> | Sur del Estado Bolívar                                  | VEN | 233.07 | Orinoco                                          |
| 81 | <i>Macrobrachium amazonicum</i> | Reserva De Desenvolvimento Sustentável Do Rio Iratapuru | BRA | 225.76 | Amazon                                           |
| 82 | <i>Macrobrachium amazonicum</i> | Mãe Maria                                               | BRA | 216.69 | Tocantins                                        |
| 83 | <i>Macrobrachium amazonicum</i> | Área De Proteção Ambiental De Mangaratiba               | BRA | 208.05 | Uruguay - Brazil, South<br>Atlantic Coast        |
| 84 | <i>Macrobrachium amazonicum</i> | Tereza Cristina                                         | BRA | 206.85 | La Plata                                         |
| 85 | <i>Macrobrachium amazonicum</i> | Nukak                                                   | COL | 197.81 | Orinoco                                          |

|     |                                 |                                              |     |        |                                        |
|-----|---------------------------------|----------------------------------------------|-----|--------|----------------------------------------|
| 86  | <i>Macrobrachium amazonicum</i> | Andirá-Marau                                 | BRA | 191.53 | Amazon                                 |
| 87  | <i>Macrobrachium amazonicum</i> | Rio Negro                                    | PRY | 175.39 | La Plata                               |
| 88  | <i>Macrobrachium amazonicum</i> | De La Tortuga Arrau                          | VEN | 173.01 | Orinoco                                |
| 89  | <i>Macrobrachium amazonicum</i> | Estação Ecológica Do Jari                    | BRA | 168.08 | Amazon                                 |
| 90  | <i>Macrobrachium amazonicum</i> | Parakanã                                     | BRA | 152.78 | Tocantins                              |
| 91  | <i>Macrobrachium amazonicum</i> | Área De Proteção Ambiental Delta Do Parnaíba | BRA | 148.43 | Parnaíba                               |
| 92  | <i>Macrobrachium amazonicum</i> | Cuenca Hidrográfica del Río Cataniapo        | VEN | 141.51 | Orinoco                                |
| 93  | <i>Macrobrachium amazonicum</i> | Estação Ecológica De Taiamã                  | BRA | 115.55 | La Plata                               |
| 94  | <i>Macrobrachium amazonicum</i> | Parque Nacional Do Itatiaia                  | BRA | 109.44 | Uruguay - Brazil, South Atlantic Coast |
| 95  | <i>Macrobrachium amazonicum</i> | Canaima                                      | VEN | 103.22 | Orinoco                                |
| 96  | <i>Macrobrachium amazonicum</i> | Reserva Extrativista Rio Cautário            | BRA | 100.49 | Amazon                                 |
| 97  | <i>Macrobrachium amazonicum</i> | Parque Nacional Da Serra Dos Orgãos          | BRA | 98.60  | Uruguay - Brazil, South Atlantic Coast |
| 98  | <i>Macrobrachium amazonicum</i> | Parque Nacional Da Serra Da Canastra         | BRA | 93.57  | La Plata                               |
| 99  | <i>Macrobrachium amazonicum</i> | Estação Ecológica Jataí                      | BRA | 90.00  | La Plata                               |
| 100 | <i>Macrobrachium amazonicum</i> | Parque Estadual Da Cantareira                | BRA | 76.20  | La Plata                               |

|     |                                 |                                              |     |       |                                               |
|-----|---------------------------------|----------------------------------------------|-----|-------|-----------------------------------------------|
| 101 | <i>Macrobrachium amazonicum</i> | Parque Nacional Da Serra Da Bocaina          | BRA | 75.45 | Uruguay - Brazil, South Atlantic Coast        |
| 102 | <i>Macrobrachium amazonicum</i> | Rio Pindaré                                  | BRA | 71.17 | North Brazil, South Atlantic Coast            |
| 103 | <i>Macrobrachium amazonicum</i> | Perigara                                     | BRA | 70.72 | La Plata                                      |
| 104 | <i>Macrobrachium amazonicum</i> | Área De Proteção Ambiental De Piaçabuçu      | BRA | 70.30 | East Brazil, South Atlantic Coast             |
| 105 | <i>Macrobrachium amazonicum</i> | Trocará                                      | BRA | 63.48 | Tocantins                                     |
| 106 | <i>Macrobrachium amazonicum</i> | Parque Estadual Turístico Do Alto Do Ribeira | BRA | 49.48 | Uruguay - Brazil, South Atlantic Coast        |
| 107 | <i>Macrobrachium amazonicum</i> | Koatinemo                                    | BRA | 49.44 | Amazon                                        |
| 108 | <i>Macrobrachium amazonicum</i> | Pauiçamba                                    | BRA | 40.62 | Amazon                                        |
| 109 | <i>Macrobrachium amazonicum</i> | Área De Proteção Ambiental De Macaé De Cima  | BRA | 40.41 | Uruguay - Brazil, South Atlantic Coast        |
| 110 | <i>Macrobrachium amazonicum</i> | Guyane                                       | GUF | 33.77 | Northeast South America, South Atlantic Coast |
| 111 | <i>Macrobrachium amazonicum</i> | Reserva Extrativista Rio Ouro Preto          | BRA | 28.54 | Amazon                                        |
| 112 | <i>Macrobrachium amazonicum</i> | Estação Ecológica Dos Caetetus               | BRA | 22.19 | La Plata                                      |
| 113 | <i>Macrobrachium amazonicum</i> | Rio Guaporé                                  | BRA | 20.20 | Amazon                                        |
| 114 | <i>Macrobrachium amazonicum</i> | Madidi                                       | BOL | 15.65 | Amazon                                        |
| 115 | <i>Macrobrachium amazonicum</i> | Piedra Pintada                               | VEN | 15.01 | Orinoco                                       |

|     |                                 |                                                             |     |       |                                        |
|-----|---------------------------------|-------------------------------------------------------------|-----|-------|----------------------------------------|
| 116 | <i>Macrobrachium amazonicum</i> | Estação Ecológica De Tamoios                                | BRA | 10.67 | Uruguay - Brazil, South Atlantic Coast |
| 117 | <i>Macrobrachium amazonicum</i> | Parque Estadual Do Cocó                                     | BRA | 8.70  | East Brazil, South Atlantic Coast      |
| 118 | <i>Macrobrachium amazonicum</i> | Parque Estadual De Vassununga                               | BRA | 8.55  | La Plata                               |
| 119 | <i>Macrobrachium amazonicum</i> | Parque Estadual Intervalles                                 | BRA | 6.94  | Uruguay - Brazil, South Atlantic Coast |
| 120 | <i>Macrobrachium amazonicum</i> | Parque Estadual De Porto Ferreira                           | BRA | 6.05  | La Plata                               |
| 121 | <i>Macrobrachium amazonicum</i> | Kararaô                                                     | BRA | 5.48  | Amazon                                 |
| 122 | <i>Macrobrachium amazonicum</i> | Floresta Nacional De Mário Xavier                           | BRA | 4.96  | Uruguay - Brazil, South Atlantic Coast |
| 123 | <i>Macrobrachium amazonicum</i> | Parque Estadual Do Jaraguá                                  | BRA | 4.92  | La Plata                               |
| 124 | <i>Macrobrachium amazonicum</i> | Piedra La Tortuga                                           | VEN | 4.69  | Orinoco                                |
| 125 | <i>Macrobrachium amazonicum</i> | Estação Ecológica De Paulo De Faria                         | BRA | 4.37  | La Plata                               |
| 126 | <i>Macrobrachium amazonicum</i> | Sagarana                                                    | BRA | 3.67  | Amazon                                 |
| 127 | <i>Macrobrachium amazonicum</i> | Arara                                                       | BRA | 3.29  | Amazon                                 |
| 128 | <i>Macrobrachium amazonicum</i> | Parque Estadual De Ibicatu                                  | BRA | 3.04  | La Plata                               |
| 129 | <i>Macrobrachium amazonicum</i> | Área De Relevante Interesse Ecológica Mata De Santa Genebra | BRA | 2.34  | La Plata                               |
| 130 | <i>Macrobrachium amazonicum</i> | Área De Relevante Interesse Ecológica Matão De Cosmópolis   | BRA | 1.73  | La Plata                               |

|     |                                 |                                                          |     |          |                                        |
|-----|---------------------------------|----------------------------------------------------------|-----|----------|----------------------------------------|
| 131 | <i>Macrobrachium amazonicum</i> | Estação Ecológica De Santa Bárbara                       | BRA | 1.63     | La Plata                               |
| 132 | <i>Macrobrachium amazonicum</i> | Área De Relevante Interesse Ecológica Floresta Da Cicuta | BRA | 1.25     | Uruguay - Brazil, South Atlantic Coast |
| 133 | <i>Macrobrachium amazonicum</i> | Estação Ecológica Mata Do Jacaré                         | BRA | 0.83     | La Plata                               |
| 134 | <i>Macrobrachium amazonicum</i> | Estação Ecológica Ibicatu                                | BRA | 0.82     | La Plata                               |
| 135 | <i>Macrobrachium amazonicum</i> | Parque Estadual Da Ara                                   | BRA | 0.67     | La Plata                               |
| 136 | <i>Macrobrachium amazonicum</i> | Reserva Biológica De Comboios                            | BRA | 0.33     | Uruguay - Brazil, South Atlantic Coast |
| 137 | <i>Macrobrachium amazonicum</i> | Manglares Churute                                        | ECU | 0.30     | Colombia - Ecuador, Pacific Coast      |
| 138 | <i>Macrobrachium jelskii</i>    | Pedernales                                               | VEN | 1,510.01 | Orinoco                                |
| 139 | <i>Macrobrachium jelskii</i>    | Discovery Coast Atlantic Forest Reserves                 | BRA | 1,224.90 | Uruguay - Brazil, South Atlantic Coast |
| 140 | <i>Macrobrachium jelskii</i>    | Área De Proteção Ambiental Ponta Da Baleia / Abrolhos    | BRA | 740.87   | Uruguay - Brazil, South Atlantic Coast |
| 141 | <i>Macrobrachium jelskii</i>    | Imataca                                                  | VEN | 482.64   | Orinoco                                |
| 142 | <i>Macrobrachium jelskii</i>    | Parque Estadual Do Rio Doce                              | BRA | 351.07   | Uruguay - Brazil, South Atlantic Coast |
| 143 | <i>Macrobrachium jelskii</i>    | Selva de Guarapiche                                      | VEN | 336.78   | Caribbean Coast                        |
| 144 | <i>Macrobrachium jelskii</i>    | Área De Proteção Ambiental Chapada Do Araripe            | BRA | 334.51   | East Brazil, South Atlantic Coast      |
| 145 | <i>Macrobrachium jelskii</i>    | Delta del Orinoco                                        | VEN | 258.60   | Orinoco                                |

|     |                              |                                              |     |        |                                        |
|-----|------------------------------|----------------------------------------------|-----|--------|----------------------------------------|
| 146 | <i>Macrobrachium jelskii</i> | Delta del Orinoco (Mariusu)                  | VEN | 254.56 | Orinoco                                |
| 147 | <i>Macrobrachium jelskii</i> | Otuquis                                      | BOL | 246.06 | La Plata                               |
| 148 | <i>Macrobrachium jelskii</i> | Santiago - Comaina                           | PER | 233.15 | Amazon                                 |
| 149 | <i>Macrobrachium jelskii</i> | Parque Nacional Do Descobrimento             | BRA | 226.94 | Uruguay - Brazil, South Atlantic Coast |
| 150 | <i>Macrobrachium jelskii</i> | Parque Nacional Do Monte Pascoal             | BRA | 222.40 | Uruguay - Brazil, South Atlantic Coast |
| 151 | <i>Macrobrachium jelskii</i> | Manglares Churute                            | ECU | 204.37 | Colombia - Ecuador, Pacific Coast      |
| 152 | <i>Macrobrachium jelskii</i> | Parque Nacional Pau Brasil                   | BRA | 189.34 | Uruguay - Brazil, South Atlantic Coast |
| 153 | <i>Macrobrachium jelskii</i> | Reserva Biológica De Una                     | BRA | 187.25 | Uruguay - Brazil, South Atlantic Coast |
| 154 | <i>Macrobrachium jelskii</i> | Reserva Biológica De Sooretama               | BRA | 176.49 | Uruguay - Brazil, South Atlantic Coast |
| 155 | <i>Macrobrachium jelskii</i> | Parque Nacional Restinga De Jurubatiba       | BRA | 148.61 | Uruguay - Brazil, South Atlantic Coast |
| 156 | <i>Macrobrachium jelskii</i> | Área De Proteção Ambiental De Massambaba     | BRA | 91.24  | Uruguay - Brazil, South Atlantic Coast |
| 157 | <i>Macrobrachium jelskii</i> | Barra Velha                                  | BRA | 90.71  | Uruguay - Brazil, South Atlantic Coast |
| 158 | <i>Macrobrachium jelskii</i> | Área De Proteção Ambiental Serra Da Ibiapaba | BRA | 82.30  | Parnaíba                               |
| 159 | <i>Macrobrachium jelskii</i> | Área De Proteção Ambiental De Piaçabuçu      | BRA | 72.36  | East Brazil, South Atlantic Coast      |
| 160 | <i>Macrobrachium jelskii</i> | Trocará                                      | BRA | 63.48  | Tocantins                              |

|     |                              |                                                   |     |       |                                        |
|-----|------------------------------|---------------------------------------------------|-----|-------|----------------------------------------|
| 161 | <i>Macrobrachium jelskii</i> | Área De Proteção Ambiental Da Serra De Sapiatiba  | BRA | 59.60 | Uruguay - Brazil, South Atlantic Coast |
| 162 | <i>Macrobrachium jelskii</i> | Reserva Biológica De Poço Das Antas               | BRA | 50.65 | Uruguay - Brazil, South Atlantic Coast |
| 163 | <i>Macrobrachium jelskii</i> | Mesa de Guanipa                                   | VEN | 49.08 | Orinoco                                |
| 164 | <i>Macrobrachium jelskii</i> | Estação Ecológica De Aiuaba                       | BRA | 48.04 | East Brazil, South Atlantic Coast      |
| 165 | <i>Macrobrachium jelskii</i> | Parque Nacional Da Tijuca                         | BRA | 39.58 | Uruguay - Brazil, South Atlantic Coast |
| 166 | <i>Macrobrachium jelskii</i> | Atlantic Forest Southeast Reserves                | BRA | 38.93 | Uruguay - Brazil, South Atlantic Coast |
| 167 | <i>Macrobrachium jelskii</i> | Reserva Biológica Estadual De Guaratiba           | BRA | 33.61 | Uruguay - Brazil, South Atlantic Coast |
| 168 | <i>Macrobrachium jelskii</i> | Área De Proteção Ambiental Cavernas Do Peruaçu    | BRA | 33.44 | Sao Francisco                          |
| 169 | <i>Macrobrachium jelskii</i> | Manuripi                                          | BOL | 32.09 | Amazon                                 |
| 170 | <i>Macrobrachium jelskii</i> | Área De Proteção Ambiental Estadual Mestre Álvaro | BRA | 23.78 | Uruguay - Brazil, South Atlantic Coast |
| 171 | <i>Macrobrachium jelskii</i> | Reserva Biológica Do Córrego Do Veado             | BRA | 22.74 | Uruguay - Brazil, South Atlantic Coast |
| 172 | <i>Macrobrachium jelskii</i> | Pacaya - Samiria                                  | PER | 16.11 | Amazon                                 |
| 173 | <i>Macrobrachium jelskii</i> | Pacaya Samiria                                    | PER | 16.11 | Amazon                                 |
| 174 | <i>Macrobrachium jelskii</i> | Rio Negro                                         | PRY | 15.06 | La Plata                               |
| 175 | <i>Macrobrachium jelskii</i> | Reserva Biológica Do Córrego Grande               | BRA | 15.04 | Uruguay - Brazil, South Atlantic Coast |

|     |                              |                                      |     |       |                                        |
|-----|------------------------------|--------------------------------------|-----|-------|----------------------------------------|
| 176 | <i>Macrobrachium jelskii</i> | Coroa Vermelha                       | BRA | 14.95 | Uruguay - Brazil, South Atlantic Coast |
| 177 | <i>Macrobrachium jelskii</i> | Estação Ecológica De Pirapitinga     | BRA | 13.84 | Sao Francisco                          |
| 178 | <i>Macrobrachium jelskii</i> | Río Guanipa                          | VEN | 13.80 | Orinoco                                |
| 179 | <i>Macrobrachium jelskii</i> | Reserva Biológica De Santa Isabel    | BRA | 13.41 | Sao Francisco                          |
| 180 | <i>Macrobrachium jelskii</i> | Águas Belas                          | BRA | 12.03 | Uruguay - Brazil, South Atlantic Coast |
| 181 | <i>Macrobrachium jelskii</i> | Estação Ecológica Do Seridó          | BRA | 11.24 | East Brazil, South Atlantic Coast      |
| 182 | <i>Macrobrachium jelskii</i> | Parque Estadual Do Desengano         | BRA | 10.67 | Uruguay - Brazil, South Atlantic Coast |
| 183 | <i>Macrobrachium jelskii</i> | Área De Proteção Ambiental De Maricá | BRA | 9.69  | Uruguay - Brazil, South Atlantic Coast |
| 184 | <i>Macrobrachium jelskii</i> | Reserva Biológica De Comboios        | BRA | 7.85  | Uruguay - Brazil, South Atlantic Coast |
| 185 | <i>Macrobrachium jelskii</i> | Reserva Extrativista Chico Mendes    | BRA | 7.56  | Amazon                                 |
| 186 | <i>Macrobrachium jelskii</i> | Reserva Biológica De Serra Negra     | BRA | 6.23  | Sao Francisco                          |
| 187 | <i>Macrobrachium jelskii</i> | Parque Estadual De Porto Ferreira    | BRA | 6.05  | La Plata                               |
| 188 | <i>Macrobrachium jelskii</i> | Estação Ecológica Jataí              | BRA | 5.92  | La Plata                               |
| 189 | <i>Macrobrachium jelskii</i> | Floresta Nacional De Mário Xavier    | BRA | 4.96  | Uruguay - Brazil, South Atlantic Coast |
| 190 | <i>Macrobrachium jelskii</i> | Estação Ecológica De Paulo De Faria  | BRA | 4.37  | La Plata                               |

|     |                                  |                                                    |     |           |                                        |
|-----|----------------------------------|----------------------------------------------------|-----|-----------|----------------------------------------|
| 191 | <i>Macrobrachium jelskii</i>     | Parque Estadual Intervales                         | BRA | 3.80      | Uruguay - Brazil, South Atlantic Coast |
| 192 | <i>Macrobrachium jelskii</i>     | Cana Brava/Guajajara                               | BRA | 2.75      | North Brazil, South Atlantic Coast     |
| 193 | <i>Macrobrachium jelskii</i>     | Floresta Nacional De Contendas Do Sincorá          | BRA | 2.50      | Uruguay - Brazil, South Atlantic Coast |
| 194 | <i>Macrobrachium jelskii</i>     | Parque Estadual Da Fonte Grande                    | BRA | 2.17      | Uruguay - Brazil, South Atlantic Coast |
| 195 | <i>Macrobrachium jelskii</i>     | Área De Proteção Ambiental Barra Do Rio Mamanguape | BRA | 1.62      | East Brazil, South Atlantic Coast      |
| 196 | <i>Macrobrachium jelskii</i>     | Coata-Laranjal                                     | BRA | 0.66      | Amazon                                 |
| 197 | <i>Macrobrachium jelskii</i>     | Parque Estadual Carlos Botelho                     | BRA | 0.25      | Uruguay - Brazil, South Atlantic Coast |
| 198 | <i>Macrobrachium jelskii</i>     | Parque Nacional Da Chapada Dos Veadeiros           | BRA | 0.18      | Tocantins                              |
| 199 | <i>Macrobrachium jelskii</i>     | Reserva Biológica De Saltinho                      | BRA | 0.01      | East Brazil, South Atlantic Coast      |
| 200 | <i>Macrobrachium rosenbergii</i> | Serrania de Chiribiquete                           | COL | 33,213.96 | Orinoco                                |
| 201 | <i>Macrobrachium rosenbergii</i> | Waimiri-Atroari                                    | BRA | 16,534.63 | Amazon                                 |
| 202 | <i>Macrobrachium rosenbergii</i> | Alto Orinoco - Casiquiare                          | VEN | 10,910.38 | Orinoco                                |
| 203 | <i>Macrobrachium rosenbergii</i> | Coata-Laranjal                                     | BRA | 10,643.29 | Amazon                                 |
| 204 | <i>Macrobrachium rosenbergii</i> | Parque Nacional Do Pico Da Neblina                 | BRA | 9,915.46  | Amazon                                 |
| 205 | <i>Macrobrachium rosenbergii</i> | Sipapo                                             | VEN | 8,176.60  | Orinoco                                |

|     |                                  |                                     |     |          |         |
|-----|----------------------------------|-------------------------------------|-----|----------|---------|
| 206 | <i>Macrobrachium rosenbergii</i> | Nukak                               | COL | 7,679.31 | Orinoco |
| 207 | <i>Macrobrachium rosenbergii</i> | Caura                               | VEN | 7,556.34 | Orinoco |
| 208 | <i>Macrobrachium rosenbergii</i> | Imataca                             | VEN | 7,479.65 | Orinoco |
| 209 | <i>Macrobrachium rosenbergii</i> | Paríma - Tapirapeco                 | VEN | 6,653.69 | Orinoco |
| 210 | <i>Macrobrachium rosenbergii</i> | Central Amazon Conservation Complex | BRA | 6,156.09 | Amazon  |
| 211 | <i>Macrobrachium rosenbergii</i> | El Tuparro                          | COL | 5,548.61 | Orinoco |
| 212 | <i>Macrobrachium rosenbergii</i> | Nhamundá/Mapuera                    | BRA | 5,236.38 | Amazon  |
| 213 | <i>Macrobrachium rosenbergii</i> | Reserva de Biosfera El Tuparro      | COL | 5,207.50 | Orinoco |
| 214 | <i>Macrobrachium rosenbergii</i> | Parque Estadual Serra Do Aracá      | BRA | 4,995.46 | Amazon  |
| 215 | <i>Macrobrachium rosenbergii</i> | Delta del Orinoco                   | VEN | 4,188.03 | Orinoco |
| 216 | <i>Macrobrachium rosenbergii</i> | Puinawai                            | COL | 4,186.89 | Orinoco |
| 217 | <i>Macrobrachium rosenbergii</i> | Floresta Nacional Do Amazonas       | BRA | 3,847.17 | Amazon  |
| 218 | <i>Macrobrachium rosenbergii</i> | Reserva Biológica Do Rio Trombetas  | BRA | 3,735.70 | Amazon  |
| 219 | <i>Macrobrachium rosenbergii</i> | Parque Nacional Do Jaú              | BRA | 3,491.08 | Amazon  |
| 220 | <i>Macrobrachium rosenbergii</i> | Sierra de la Macarena               | COL | 3,382.35 | Orinoco |

|     |                                  |                                                                          |     |          |                                                  |
|-----|----------------------------------|--------------------------------------------------------------------------|-----|----------|--------------------------------------------------|
| 221 | <i>Macrobrachium rosenbergii</i> | Parque Nacional De Anavilhanas                                           | BRA | 2,689.99 | Amazon                                           |
| 222 | <i>Macrobrachium rosenbergii</i> | Yapacana                                                                 | VEN | 2,684.37 | Orinoco                                          |
| 223 | <i>Macrobrachium rosenbergii</i> | Zona Sur Lago de Maracaibo                                               | VEN | 2,538.07 | Caribbean Coast                                  |
| 224 | <i>Macrobrachium rosenbergii</i> | Andirá-Marau                                                             | BRA | 2,525.29 | Amazon                                           |
| 225 | <i>Macrobrachium rosenbergii</i> | Área De Proteção Ambiental De Presidente Figueiredo - Caverna Do Moroaga | BRA | 2,511.69 | Amazon                                           |
| 226 | <i>Macrobrachium rosenbergii</i> | Cunhã-Sapucaia                                                           | BRA | 2,484.74 | Amazon                                           |
| 227 | <i>Macrobrachium rosenbergii</i> | Reserva Extrativista Rio Cajari                                          | BRA | 2,450.57 | Amazon                                           |
| 228 | <i>Macrobrachium rosenbergii</i> | Estação Ecológica De Niquiá                                              | BRA | 2,383.45 | Amazon                                           |
| 229 | <i>Macrobrachium rosenbergii</i> | Merejina                                                                 | VEN | 2,355.28 | Orinoco                                          |
| 230 | <i>Macrobrachium rosenbergii</i> | Guyane                                                                   | GUF | 2,275.11 | Northeast South America,<br>South Atlantic Coast |
| 231 | <i>Macrobrachium rosenbergii</i> | Acuífero de Calabozo                                                     | VEN | 2,104.25 | Orinoco                                          |
| 232 | <i>Macrobrachium rosenbergii</i> | Iwokrama International Centre                                            | GUY | 2,056.94 | Northeast South America,<br>South Atlantic Coast |
| 233 | <i>Macrobrachium rosenbergii</i> | Central Suriname Nature Reserve                                          | SUR | 1,974.56 | Northeast South America,<br>South Atlantic Coast |
| 234 | <i>Macrobrachium rosenbergii</i> | La Paya                                                                  | COL | 1,911.30 | Amazon                                           |
| 235 | <i>Macrobrachium rosenbergii</i> | Ticoporo                                                                 | VEN | 1,807.53 | Orinoco                                          |

|     |                                  |                                                       |     |          |                                                  |
|-----|----------------------------------|-------------------------------------------------------|-----|----------|--------------------------------------------------|
| 236 | <i>Macrobrachium rosenbergii</i> | Caparo                                                | VEN | 1,750.69 | Orinoco                                          |
| 237 | <i>Macrobrachium rosenbergii</i> | Macizo Cuao - Sipapo y Cerro Moriche                  | VEN | 1,706.24 | Orinoco                                          |
| 238 | <i>Macrobrachium rosenbergii</i> | Parque Nacional Viruá                                 | BRA | 1,608.43 | Amazon                                           |
| 239 | <i>Macrobrachium rosenbergii</i> | Mamirauá                                              | BRA | 1,518.01 | Amazon                                           |
| 240 | <i>Macrobrachium rosenbergii</i> | Ciénagas de Juan Manuel, Aguas Blancas y Aguas Negras | VEN | 1,434.71 | Caribbean Coast                                  |
| 241 | <i>Macrobrachium rosenbergii</i> | Central Suriname                                      | SUR | 1,420.35 | Northeast South America,<br>South Atlantic Coast |
| 242 | <i>Macrobrachium rosenbergii</i> | Floresta Nacional De Saracá-Taquera                   | BRA | 1,373.67 | Amazon                                           |
| 243 | <i>Macrobrachium rosenbergii</i> | Pacaya - Samiria                                      | PER | 1,362.04 | Amazon                                           |
| 244 | <i>Macrobrachium rosenbergii</i> | Pacaya Samiria                                        | PER | 1,362.03 | Amazon                                           |
| 245 | <i>Macrobrachium rosenbergii</i> | Sierra Maigualida                                     | VEN | 1,339.28 | Orinoco                                          |
| 246 | <i>Macrobrachium rosenbergii</i> | Reserva Biológica Do Abufari                          | BRA | 1,301.90 | Amazon                                           |
| 247 | <i>Macrobrachium rosenbergii</i> | Ciénagas de Juan Manuel                               | VEN | 1,269.53 | Caribbean Coast                                  |
| 248 | <i>Macrobrachium rosenbergii</i> | Reserva De Desenvolvimento Sustentável Mamirauá       | BRA | 1,265.47 | Amazon                                           |
| 249 | <i>Macrobrachium rosenbergii</i> | Shell Beach Protected Area                            | GUY | 1,193.46 | Northeast South America,<br>South Atlantic Coast |
| 250 | <i>Macrobrachium rosenbergii</i> | Uaça                                                  | BRA | 1,161.71 | Northeast South America,<br>South Atlantic Coast |

|     |                                  |                                   |     |          |                                                  |
|-----|----------------------------------|-----------------------------------|-----|----------|--------------------------------------------------|
| 251 | <i>Macrobrachium rosenbergii</i> | Parque Nacional Da Amazônia       | BRA | 1,151.33 | Amazon                                           |
| 252 | <i>Macrobrachium rosenbergii</i> | Parque Nacional Serra Da Mocidade | BRA | 1,137.48 | Amazon                                           |
| 253 | <i>Macrobrachium rosenbergii</i> | Floresta Nacional De Tefé         | BRA | 1,104.37 | Amazon                                           |
| 254 | <i>Macrobrachium rosenbergii</i> | Marais De Kaw                     | GUF | 989.08   | Northeast South America,<br>South Atlantic Coast |
| 255 | <i>Macrobrachium rosenbergii</i> | Pirahã                            | BRA | 936.22   | Amazon                                           |
| 256 | <i>Macrobrachium rosenbergii</i> | Tinigua                           | COL | 870.30   | Orinoco                                          |
| 257 | <i>Macrobrachium rosenbergii</i> | Márgenes del Río Guárico          | VEN | 868.86   | Orinoco                                          |
| 258 | <i>Macrobrachium rosenbergii</i> | Ávare I                           | BRA | 864.96   | Amazon                                           |
| 259 | <i>Macrobrachium rosenbergii</i> | Santo Domingo                     | VEN | 854.89   | Orinoco                                          |
| 260 | <i>Macrobrachium rosenbergii</i> | Santos Luzardo                    | VEN | 780.13   | Orinoco                                          |
| 261 | <i>Macrobrachium rosenbergii</i> | Achaguas                          | VEN | 779.37   | Orinoco                                          |
| 262 | <i>Macrobrachium rosenbergii</i> | Ipixuna                           | BRA | 710.82   | Amazon                                           |
| 263 | <i>Macrobrachium rosenbergii</i> | Reserva Biológica Do Uatumã       | BRA | 701.75   | Amazon                                           |
| 264 | <i>Macrobrachium rosenbergii</i> | Noord Saramacca                   | SUR | 684.05   | Northeast South America,<br>South Atlantic Coast |
| 265 | <i>Macrobrachium rosenbergii</i> | Serranía La Neblina               | VEN | 683.72   | Amazon                                           |

|     |                                  |                                                         |     |        |                                               |
|-----|----------------------------------|---------------------------------------------------------|-----|--------|-----------------------------------------------|
| 266 | <i>Macrobrachium rosenbergii</i> | Uneiuxi                                                 | BRA | 679.44 | Amazon                                        |
| 267 | <i>Macrobrachium rosenbergii</i> | Área De Proteção Ambiental Das Reentrâncias Maranhenses | BRA | 650.07 | North Brazil, South Atlantic Coast            |
| 268 | <i>Macrobrachium rosenbergii</i> | Basse-Mana                                              | GUF | 634.53 | Northeast South America, South Atlantic Coast |
| 269 | <i>Macrobrachium rosenbergii</i> | Raposa Serra do Sol                                     | BRA | 623.00 | Amazon                                        |
| 270 | <i>Macrobrachium rosenbergii</i> | Reentrancias Maranhenses                                | BRA | 620.82 | North Brazil, South Atlantic Coast            |
| 271 | <i>Macrobrachium rosenbergii</i> | Los Katíos National Park                                | COL | 588.53 | Caribbean Coast                               |
| 272 | <i>Macrobrachium rosenbergii</i> | Marais De Kaw-Roura                                     | GUF | 587.13 | Northeast South America, South Atlantic Coast |
| 273 | <i>Macrobrachium rosenbergii</i> | Los Katios                                              | COL | 574.22 | Caribbean Coast                               |
| 274 | <i>Macrobrachium rosenbergii</i> | Santa Rosa                                              | VEN | 567.44 | Caribbean Coast                               |
| 275 | <i>Macrobrachium rosenbergii</i> | Parque Nacional Do Cabo Orange                          | BRA | 558.57 | Northeast South America, South Atlantic Coast |
| 276 | <i>Macrobrachium rosenbergii</i> | Río Tarra                                               | VEN | 488.37 | Caribbean Coast                               |
| 277 | <i>Macrobrachium rosenbergii</i> | Sur del Estado Bolívar                                  | VEN | 475.77 | Orinoco                                       |
| 278 | <i>Macrobrachium rosenbergii</i> | North Commewijne - Marowijne                            | SUR | 457.48 | Northeast South America, South Atlantic Coast |
| 279 | <i>Macrobrachium rosenbergii</i> | Ávare II                                                | BRA | 451.42 | Amazon                                        |
| 280 | <i>Macrobrachium rosenbergii</i> | Estação Ecológica De Maracá                             | BRA | 421.70 | Amazon                                        |

|     |                                  |                                                               |     |        |                                                  |
|-----|----------------------------------|---------------------------------------------------------------|-----|--------|--------------------------------------------------|
| 281 | <i>Macrobrachium rosenbergii</i> | Jumina                                                        | BRA | 417.45 | Northeast South America,<br>South Atlantic Coast |
| 282 | <i>Macrobrachium rosenbergii</i> | Apurinã Igarapé Tauamirim                                     | BRA | 411.67 | Amazon                                           |
| 283 | <i>Macrobrachium rosenbergii</i> | Delta del Orinoco (Mariusa)                                   | VEN | 407.78 | Orinoco                                          |
| 284 | <i>Macrobrachium rosenbergii</i> | Floresta Nacional De Itaituba Ii                              | BRA | 407.38 | Amazon                                           |
| 285 | <i>Macrobrachium rosenbergii</i> | Región Lago de Maracaibo (Sierra de Perijá) (Polígonos 1 y 2) | VEN | 388.68 | Caribbean Coast                                  |
| 286 | <i>Macrobrachium rosenbergii</i> | San Fernando                                                  | VEN | 367.38 | Orinoco                                          |
| 287 | <i>Macrobrachium rosenbergii</i> | Vui-Uata-In                                                   | BRA | 360.67 | Amazon                                           |
| 288 | <i>Macrobrachium rosenbergii</i> | Cuyabeno                                                      | ECU | 341.90 | Amazon                                           |
| 289 | <i>Macrobrachium rosenbergii</i> | WaiWai                                                        | BRA | 341.82 | Amazon                                           |
| 290 | <i>Macrobrachium rosenbergii</i> | Pedernales                                                    | VEN | 335.98 | Orinoco                                          |
| 291 | <i>Macrobrachium rosenbergii</i> | Paramillo                                                     | COL | 335.01 | Caribbean Coast                                  |
| 292 | <i>Macrobrachium rosenbergii</i> | Cerro Vinilla y Cerro Aratitiope                              | VEN | 334.18 | Orinoco                                          |
| 293 | <i>Macrobrachium rosenbergii</i> | Sierra Unturán                                                | VEN | 333.07 | Orinoco                                          |
| 294 | <i>Macrobrachium rosenbergii</i> | Reserva de la Biosfera Sierra Nevada de Santa Marta           | COL | 333.04 | Caribbean Coast                                  |
| 295 | <i>Macrobrachium rosenbergii</i> | Río Orichuna                                                  | VEN | 326.46 | Orinoco                                          |

|     |                                  |                                     |     |        |                                                  |
|-----|----------------------------------|-------------------------------------|-----|--------|--------------------------------------------------|
| 296 | <i>Macrobrachium rosenbergii</i> | Área De Proteção Ambiental Nhamundá | BRA | 291.05 | Amazon                                           |
| 297 | <i>Macrobrachium rosenbergii</i> | Copi                                | SUR | 282.32 | Northeast South America,<br>South Atlantic Coast |
| 298 | <i>Macrobrachium rosenbergii</i> | Boven-Coesewijne                    | SUR | 273.97 | Northeast South America,<br>South Atlantic Coast |
| 299 | <i>Macrobrachium rosenbergii</i> | Estuaire du fleuve Sinnamary        | GUF | 261.13 | Northeast South America,<br>South Atlantic Coast |
| 300 | <i>Macrobrachium rosenbergii</i> | Crique Et Pripri Yiyi               | GUF | 258.66 | Northeast South America,<br>South Atlantic Coast |
| 301 | <i>Macrobrachium rosenbergii</i> | Río Viejo - San Camilo              | VEN | 250.70 | Orinoco                                          |
| 302 | <i>Macrobrachium rosenbergii</i> | São Leopoldo                        | BRA | 234.07 | Amazon                                           |
| 303 | <i>Macrobrachium rosenbergii</i> | Santiago - Comaina                  | PER | 233.15 | Amazon                                           |
| 304 | <i>Macrobrachium rosenbergii</i> | Coppename Monding                   | SUR | 230.57 | Northeast South America,<br>South Atlantic Coast |
| 305 | <i>Macrobrachium rosenbergii</i> | Floresta Nacional De Roraima        | BRA | 212.82 | Amazon                                           |
| 306 | <i>Macrobrachium rosenbergii</i> | San Camilo                          | VEN | 210.31 | Orinoco                                          |
| 307 | <i>Macrobrachium rosenbergii</i> | Canaima                             | VEN | 200.20 | Orinoco                                          |
| 308 | <i>Macrobrachium rosenbergii</i> | Rio Manicoré                        | BRA | 193.34 | Amazon                                           |
| 309 | <i>Macrobrachium rosenbergii</i> | Tikúna de Feijoal                   | BRA | 193.24 | Amazon                                           |
| 310 | <i>Macrobrachium rosenbergii</i> | Wane Kreek                          | SUR | 187.99 | Northeast South America,<br>South Atlantic Coast |

|     |                                  |                                                                                                                                  |     |        |                                                  |
|-----|----------------------------------|----------------------------------------------------------------------------------------------------------------------------------|-----|--------|--------------------------------------------------|
| 311 | <i>Macrobrachium rosenbergii</i> | El Yagual                                                                                                                        | VEN | 186.10 | Orinoco                                          |
| 312 | <i>Macrobrachium rosenbergii</i> | Lago Aiapua                                                                                                                      | BRA | 185.19 | Amazon                                           |
| 313 | <i>Macrobrachium rosenbergii</i> | Sables Blancs De Mana                                                                                                            | GUF | 176.63 | Northeast South America,<br>South Atlantic Coast |
| 314 | <i>Macrobrachium rosenbergii</i> | De La Tortuga Arrau                                                                                                              | VEN | 173.01 | Orinoco                                          |
| 315 | <i>Macrobrachium rosenbergii</i> | Duida - Marahuaca                                                                                                                | VEN | 166.80 | Orinoco                                          |
| 316 | <i>Macrobrachium rosenbergii</i> | Coppenamemonding                                                                                                                 | SUR | 165.67 | Northeast South America,<br>South Atlantic Coast |
| 317 | <i>Macrobrachium rosenbergii</i> | Sabanas de Anaro                                                                                                                 | VEN | 164.18 | Orinoco                                          |
| 318 | <i>Macrobrachium rosenbergii</i> | Paumari do Lago Paricá                                                                                                           | BRA | 157.93 | Amazon                                           |
| 319 | <i>Macrobrachium rosenbergii</i> | Río Aricuaisá                                                                                                                    | VEN | 154.39 | Caribbean Coast                                  |
| 320 | <i>Macrobrachium rosenbergii</i> | La Paragua                                                                                                                       | VEN | 149.02 | Orinoco                                          |
| 321 | <i>Macrobrachium rosenbergii</i> | L'Amana                                                                                                                          | GUF | 144.68 | Northeast South America,<br>South Atlantic Coast |
| 322 | <i>Macrobrachium rosenbergii</i> | Cuenca Hidrográfica del Río Cataniapo                                                                                            | VEN | 141.51 | Orinoco                                          |
| 323 | <i>Macrobrachium rosenbergii</i> | Peruvia                                                                                                                          | SUR | 131.90 | Northeast South America,<br>South Atlantic Coast |
| 324 | <i>Macrobrachium rosenbergii</i> | Estero de Chiriguare                                                                                                             | VEN | 129.52 | Orinoco                                          |
| 325 | <i>Macrobrachium rosenbergii</i> | Distritos Obispos, Sosa, Rojas y Bolívar del Estado Barinas, y<br>Guanare y Guanarito del Estado Portuguesa (Guanare - Masparro) | VEN | 127.62 | Orinoco                                          |

|     |                                  |                                     |     |        |                                                  |
|-----|----------------------------------|-------------------------------------|-----|--------|--------------------------------------------------|
| 326 | <i>Macrobrachium rosenbergii</i> | Río Tucuco                          | VEN | 127.02 | Caribbean Coast                                  |
| 327 | <i>Macrobrachium rosenbergii</i> | Apurinã do Igarapé São João         | BRA | 123.03 | Amazon                                           |
| 328 | <i>Macrobrachium rosenbergii</i> | Cerro Camani y Cerro Morrocoy       | VEN | 120.03 | Orinoco                                          |
| 329 | <i>Macrobrachium rosenbergii</i> | La Trinité                          | GUF | 118.91 | Northeast South America,<br>South Atlantic Coast |
| 330 | <i>Macrobrachium rosenbergii</i> | Sepoti                              | BRA | 107.29 | Amazon                                           |
| 331 | <i>Macrobrachium rosenbergii</i> | Betania                             | BRA | 104.63 | Amazon                                           |
| 332 | <i>Macrobrachium rosenbergii</i> | Murutinga                           | BRA | 103.97 | Amazon                                           |
| 333 | <i>Macrobrachium rosenbergii</i> | Guapenu                             | BRA | 103.96 | Amazon                                           |
| 334 | <i>Macrobrachium rosenbergii</i> | Capivara                            | BRA | 103.95 | Amazon                                           |
| 335 | <i>Macrobrachium rosenbergii</i> | Estação Ecológica De Jutai-Solimões | BRA | 103.08 | Amazon                                           |
| 336 | <i>Macrobrachium rosenbergii</i> | Aguaro - Guariquito                 | VEN | 102.95 | Orinoco                                          |
| 337 | <i>Macrobrachium rosenbergii</i> | Sai-Cinza                           | BRA | 101.07 | Amazon                                           |
| 338 | <i>Macrobrachium rosenbergii</i> | Noord Coronie                       | SUR | 87.11  | Northeast South America,<br>South Atlantic Coast |
| 339 | <i>Macrobrachium rosenbergii</i> | Cordillera de los Picachos          | COL | 86.10  | Orinoco                                          |
| 340 | <i>Macrobrachium rosenbergii</i> | Aningal                             | BRA | 76.67  | Amazon                                           |

|     |                                  |                                                     |     |       |                                                  |
|-----|----------------------------------|-----------------------------------------------------|-----|-------|--------------------------------------------------|
| 341 | <i>Macrobrachium rosenbergii</i> | Kanuku Mountains Protected Area                     | GUY | 75.89 | Northeast South America,<br>South Atlantic Coast |
| 342 | <i>Macrobrachium rosenbergii</i> | Floresta Nacional De Itaituba I                     | BRA | 71.43 | Amazon                                           |
| 343 | <i>Macrobrachium rosenbergii</i> | Uati-Paraná                                         | BRA | 68.46 | Amazon                                           |
| 344 | <i>Macrobrachium rosenbergii</i> | Terra Vermelha                                      | BRA | 65.67 | Amazon                                           |
| 345 | <i>Macrobrachium rosenbergii</i> | Galibi                                              | BRA | 62.90 | Northeast South America,<br>South Atlantic Coast |
| 346 | <i>Macrobrachium rosenbergii</i> | Brinck-heuvel                                       | SUR | 60.89 | Northeast South America,<br>South Atlantic Coast |
| 347 | <i>Macrobrachium rosenbergii</i> | Paumari do Cuniuá                                   | BRA | 60.05 | Amazon                                           |
| 348 | <i>Macrobrachium rosenbergii</i> | Paumari do Lago Manissuã                            | BRA | 56.83 | Amazon                                           |
| 349 | <i>Macrobrachium rosenbergii</i> | Manoa/Pium                                          | BRA | 48.43 | Amazon                                           |
| 350 | <i>Macrobrachium rosenbergii</i> | Área De Relevante Interesse Ecológica Javari Buriti | BRA | 48.40 | Amazon                                           |
| 351 | <i>Macrobrachium rosenbergii</i> | Tukuna Umariáçu                                     | BRA | 48.25 | Amazon                                           |
| 352 | <i>Macrobrachium rosenbergii</i> | Ouro                                                | BRA | 47.41 | Amazon                                           |
| 353 | <i>Macrobrachium rosenbergii</i> | Estrela da Paz                                      | BRA | 45.04 | Amazon                                           |
| 354 | <i>Macrobrachium rosenbergii</i> | Kaboeri Kreek                                       | SUR | 43.35 | Northeast South America,<br>South Atlantic Coast |
| 355 | <i>Macrobrachium rosenbergii</i> | Lago do Beruri                                      | BRA | 42.75 | Amazon                                           |

|     |                                  |                              |     |       |                                                  |
|-----|----------------------------------|------------------------------|-----|-------|--------------------------------------------------|
| 356 | <i>Macrobrachium rosenbergii</i> | Yasuní                       | ECU | 40.68 | Amazon                                           |
| 357 | <i>Macrobrachium rosenbergii</i> | El Corchal El Mono Hernandez | COL | 37.58 | Caribbean Coast                                  |
| 358 | <i>Macrobrachium rosenbergii</i> | Jabuti                       | BRA | 37.54 | Amazon                                           |
| 359 | <i>Macrobrachium rosenbergii</i> | Nouragues                    | GUF | 36.77 | Northeast South America,<br>South Atlantic Coast |
| 360 | <i>Macrobrachium rosenbergii</i> | Tiznados                     | VEN | 29.87 | Orinoco                                          |
| 361 | <i>Macrobrachium rosenbergii</i> | Bigi Pan                     | SUR | 25.20 | Northeast South America,<br>South Atlantic Coast |
| 362 | <i>Macrobrachium rosenbergii</i> | Brownsberg                   | SUR | 22.65 | Northeast South America,<br>South Atlantic Coast |
| 363 | <i>Macrobrachium rosenbergii</i> | Caí±o Guaritíco              | VEN | 21.26 | Orinoco                                          |
| 364 | <i>Macrobrachium rosenbergii</i> | Jaquiri                      | BRA | 19.18 | Amazon                                           |
| 365 | <i>Macrobrachium rosenbergii</i> | Barreira da Missão           | BRA | 19.01 | Amazon                                           |
| 366 | <i>Macrobrachium rosenbergii</i> | Trincheira                   | BRA | 17.41 | Amazon                                           |
| 367 | <i>Macrobrachium rosenbergii</i> | Canaima National Park        | VEN | 15.74 | Orinoco                                          |
| 368 | <i>Macrobrachium rosenbergii</i> | Piedra Pintada               | VEN | 15.01 | Orinoco                                          |
| 369 | <i>Macrobrachium rosenbergii</i> | Cuia                         | BRA | 13.43 | Amazon                                           |
| 370 | <i>Macrobrachium rosenbergii</i> | Darien                       | COL | 9.93  | Caribbean Coast                                  |

|     |                                  |                             |     |      |                 |
|-----|----------------------------------|-----------------------------|-----|------|-----------------|
| 371 | <i>Macrobrachium rosenbergii</i> | Paracuhuba                  | BRA | 9.39 | Amazon          |
| 372 | <i>Macrobrachium rosenbergii</i> | Raimundão                   | BRA | 9.13 | Amazon          |
| 373 | <i>Macrobrachium rosenbergii</i> | Tabocal                     | BRA | 9.05 | Amazon          |
| 374 | <i>Macrobrachium rosenbergii</i> | Padre                       | BRA | 7.97 | Amazon          |
| 375 | <i>Macrobrachium rosenbergii</i> | Macarrão                    | BRA | 7.37 | Amazon          |
| 376 | <i>Macrobrachium rosenbergii</i> | Tukuna Porto Espiritual     | BRA | 5.85 | Amazon          |
| 377 | <i>Macrobrachium rosenbergii</i> | Piedra La Tortuga           | VEN | 4.69 | Orinoco         |
| 378 | <i>Macrobrachium rosenbergii</i> | Cuenca Alta del Cano Alonso | COL | 4.67 | Magdalena       |
| 379 | <i>Macrobrachium rosenbergii</i> | Natal/Felicidade            | BRA | 3.34 | Amazon          |
| 380 | <i>Macrobrachium rosenbergii</i> | Munduruku                   | BRA | 3.15 | Amazon          |
| 381 | <i>Macrobrachium rosenbergii</i> | Los Flamencos               | COL | 2.81 | Caribbean Coast |
| 382 | <i>Macrobrachium rosenbergii</i> | Recreio/São Félix           | BRA | 2.39 | Amazon          |
| 383 | <i>Macrobrachium rosenbergii</i> | Ilha do Camaleão            | BRA | 1.65 | Amazon          |
| 384 | <i>Macrobrachium rosenbergii</i> | Itaitinga                   | BRA | 1.36 | Amazon          |
| 385 | <i>Macrobrachium rosenbergii</i> | Boa Vista - AM              | BRA | 1.33 | Amazon          |

|     |                                  |                                                                                           |     |          |                                               |
|-----|----------------------------------|-------------------------------------------------------------------------------------------|-----|----------|-----------------------------------------------|
| 386 | <i>Macrobrachium rosenbergii</i> | Bom Jesus                                                                                 | BRA | 1.25     | Amazon                                        |
| 387 | <i>Macrobrachium rosenbergii</i> | Miratu                                                                                    | BRA | 0.99     | Amazon                                        |
| 388 | <i>Macrobrachium rosenbergii</i> | Área De Relevante Interesse Ecológica Projeto Dinâmica Biológica De Fragmentos Florestais | BRA | 0.97     | Amazon                                        |
| 389 | <i>Macrobrachium rosenbergii</i> | Los Corales del Rosario y San Bernardo                                                    | COL | 0.95     | Caribbean Coast                               |
| 390 | <i>Macrobrachium rosenbergii</i> | Saline De Montjoly                                                                        | GUF | 0.64     | Northeast South America, South Atlantic Coast |
| 391 | <i>Macrobrachium rosenbergii</i> | Alto Turiaçu                                                                              | BRA | 0.58     | North Brazil, South Atlantic Coast            |
| 392 | <i>Procambarus clarkii</i>       | Lagunas de Guanacache, Desaguadero y del Bebedero                                         | ARG | 9,152.10 | South America, Colorado                       |
| 393 | <i>Procambarus clarkii</i>       | Valle Fértil                                                                              | ARG | 6,881.58 | South America, Colorado                       |
| 394 | <i>Procambarus clarkii</i>       | Bañados del Este                                                                          | URY | 3,893.40 | Uruguay - Brazil, South Atlantic Coast        |
| 395 | <i>Procambarus clarkii</i>       | Bahía de Samborombón                                                                      | ARG | 3,860.84 | La Plata                                      |
| 396 | <i>Procambarus clarkii</i>       | Iberá                                                                                     | ARG | 3,207.96 | La Plata                                      |
| 397 | <i>Procambarus clarkii</i>       | Laguna Salada Grande                                                                      | ARG | 2,970.02 | North Argentina, South Atlantic Coast         |
| 398 | <i>Procambarus clarkii</i>       | Tariquía                                                                                  | BOL | 2,185.36 | La Plata                                      |
| 399 | <i>Procambarus clarkii</i>       | Ischigualasto / Talampaya Natural Parks                                                   | ARG | 2,140.97 | South America, Colorado                       |
| 400 | <i>Procambarus clarkii</i>       | Talampaya                                                                                 | ARG | 1,529.53 | South America, Colorado                       |

|     |                            |                                    |     |          |                                        |
|-----|----------------------------|------------------------------------|-----|----------|----------------------------------------|
| 401 | <i>Procambarus clarkii</i> | Atlantic Forest Southeast Reserves | BRA | 1,237.77 | Uruguay - Brazil, South Atlantic Coast |
| 402 | <i>Procambarus clarkii</i> | Copo                               | ARG | 1,180.75 | La Plata                               |
| 403 | <i>Procambarus clarkii</i> | Aguarague                          | BOL | 1,108.60 | La Plata                               |
| 404 | <i>Procambarus clarkii</i> | Tinfunque                          | PRY | 972.11   | La Plata                               |
| 405 | <i>Procambarus clarkii</i> | Humedal Laguna Melincué            | ARG | 935.86   | La Plata                               |
| 406 | <i>Procambarus clarkii</i> | Delta del Parana                   | ARG | 910.64   | La Plata                               |
| 407 | <i>Procambarus clarkii</i> | Calilegua                          | ARG | 775.21   | La Plata                               |
| 408 | <i>Procambarus clarkii</i> | Sierra de las Quijadas             | ARG | 737.61   | South America, Colorado                |
| 409 | <i>Procambarus clarkii</i> | Baritú                             | ARG | 682.07   | La Plata                               |
| 410 | <i>Procambarus clarkii</i> | Ischigualasto                      | ARG | 662.07   | South America, Colorado                |
| 411 | <i>Procambarus clarkii</i> | Riacho Teuquito                    | ARG | 651.41   | La Plata                               |
| 412 | <i>Procambarus clarkii</i> | Parque Nacional Rio Pilcomayo      | ARG | 515.01   | La Plata                               |
| 413 | <i>Procambarus clarkii</i> | Bahía de San Antonio               | ARG | 508.88   | South Argentina, South Atlantic Coast  |
| 414 | <i>Procambarus clarkii</i> | Río Pilcomayo                      | ARG | 508.32   | La Plata                               |
| 415 | <i>Procambarus clarkii</i> | Cordillera de Sama                 | BOL | 492.70   | La Plata                               |

|     |                            |                                                          |     |        |                                        |
|-----|----------------------------|----------------------------------------------------------|-----|--------|----------------------------------------|
| 416 | <i>Procambarus clarkii</i> | Alto Mayo                                                | PER | 435.12 | Amazon                                 |
| 417 | <i>Procambarus clarkii</i> | El Rey                                                   | ARG | 401.91 | La Plata                               |
| 418 | <i>Procambarus clarkii</i> | Paracas                                                  | PER | 361.73 | Peru, Pacific Coast                    |
| 419 | <i>Procambarus clarkii</i> | de Paracas                                               | PER | 360.97 | Peru, Pacific Coast                    |
| 420 | <i>Procambarus clarkii</i> | Río Abiseo National Park                                 | PER | 338.88 | Amazon                                 |
| 421 | <i>Procambarus clarkii</i> | del Río Abiseo                                           | PER | 338.88 | Amazon                                 |
| 422 | <i>Procambarus clarkii</i> | Lago Ypacarai                                            | PRY | 334.23 | La Plata                               |
| 423 | <i>Procambarus clarkii</i> | Carrasco                                                 | BOL | 326.92 | Amazon                                 |
| 424 | <i>Procambarus clarkii</i> | Parque Estadual Turístico Do Alto Do Ribeira             | BRA | 322.37 | Uruguay - Brazil, South Atlantic Coast |
| 425 | <i>Procambarus clarkii</i> | Yanachaga-Chemillén                                      | PER | 322.30 | Amazon                                 |
| 426 | <i>Procambarus clarkii</i> | Madidi                                                   | BOL | 301.99 | Amazon                                 |
| 427 | <i>Procambarus clarkii</i> | Parque Estadual Carlos Botelho                           | BRA | 294.84 | Uruguay - Brazil, South Atlantic Coast |
| 428 | <i>Procambarus clarkii</i> | Otishi                                                   | PER | 294.78 | Amazon                                 |
| 429 | <i>Procambarus clarkii</i> | Parque Atlántico Mar Chiquito                            | ARG | 286.07 | North Argentina, South Atlantic Coast  |
| 430 | <i>Procambarus clarkii</i> | Área De Proteção Ambiental Ilhas E Várzeas Do Rio Paraná | BRA | 285.50 | La Plata                               |

|     |                            |                                             |     |        |                                        |
|-----|----------------------------|---------------------------------------------|-----|--------|----------------------------------------|
| 431 | <i>Procambarus clarkii</i> | Podocarpus                                  | ECU | 282.18 | Amazon                                 |
| 432 | <i>Procambarus clarkii</i> | Ñacuñan                                     | ARG | 281.94 | South America, Colorado                |
| 433 | <i>Procambarus clarkii</i> | Estação Ecológica Do Taim                   | BRA | 277.89 | Uruguay - Brazil, South Atlantic Coast |
| 434 | <i>Procambarus clarkii</i> | Lihué Calel                                 | ARG | 270.02 | South America, Colorado                |
| 435 | <i>Procambarus clarkii</i> | Parque Costero del Sur                      | ARG | 267.39 | La Plata                               |
| 436 | <i>Procambarus clarkii</i> | Área De Proteção Ambiental De Macaé De Cima | BRA | 262.67 | Uruguay - Brazil, South Atlantic Coast |
| 437 | <i>Procambarus clarkii</i> | Megantoni                                   | PER | 243.29 | Amazon                                 |
| 438 | <i>Procambarus clarkii</i> | Parque Estadual Do Morro Do Diabo           | BRA | 241.20 | La Plata                               |
| 439 | <i>Procambarus clarkii</i> | Parque Estadual Do Rio Doce                 | BRA | 215.51 | Uruguay - Brazil, South Atlantic Coast |
| 440 | <i>Procambarus clarkii</i> | Parque Estadual Do Desengano                | BRA | 214.04 | Uruguay - Brazil, South Atlantic Coast |
| 441 | <i>Procambarus clarkii</i> | Área De Proteção Ambiental De Mangaratiba   | BRA | 194.07 | Uruguay - Brazil, South Atlantic Coast |
| 442 | <i>Procambarus clarkii</i> | Parque Estadual Intervalles                 | BRA | 180.36 | Uruguay - Brazil, South Atlantic Coast |
| 443 | <i>Procambarus clarkii</i> | Mburucuyá                                   | ARG | 177.19 | La Plata                               |
| 444 | <i>Procambarus clarkii</i> | Santa Ana                                   | ARG | 172.61 | Mar Chiquita                           |
| 445 | <i>Procambarus clarkii</i> | Toro Toro                                   | BOL | 168.06 | Amazon                                 |

|     |                            |                       |     |        |                                       |
|-----|----------------------------|-----------------------|-----|--------|---------------------------------------|
| 446 | <i>Procambarus clarkii</i> | Sunchubamba           | PER | 161.52 | Amazon                                |
| 447 | <i>Procambarus clarkii</i> | Llanos del Challe     | CHL | 150.74 | North Chile, Pacific Coast            |
| 448 | <i>Procambarus clarkii</i> | Los Ilinizas          | ECU | 143.09 | Colombia - Ecuador, Pacific Coast     |
| 449 | <i>Procambarus clarkii</i> | Los Palmares          | ARG | 141.78 | La Plata                              |
| 450 | <i>Procambarus clarkii</i> | Sangay                | ECU | 137.75 | Amazon                                |
| 451 | <i>Procambarus clarkii</i> | Ñancuñan              | ARG | 129.49 | South America, Colorado               |
| 452 | <i>Procambarus clarkii</i> | Chaco                 | ARG | 123.37 | La Plata                              |
| 453 | <i>Procambarus clarkii</i> | Sierra de San Javier  | ARG | 121.28 | Mar Chiquita                          |
| 454 | <i>Procambarus clarkii</i> | Tunari                | BOL | 106.54 | Amazon                                |
| 455 | <i>Procambarus clarkii</i> | Complejo Islote Lobos | ARG | 103.39 | South Argentina, South Atlantic Coast |
| 456 | <i>Procambarus clarkii</i> | Parque Luro           | ARG | 96.77  | Pampas Region                         |
| 457 | <i>Procambarus clarkii</i> | Pui Pui               | PER | 94.51  | Amazon                                |
| 458 | <i>Procambarus clarkii</i> | Formosa               | ARG | 90.75  | La Plata                              |
| 459 | <i>Procambarus clarkii</i> | del Manu              | PER | 90.56  | Amazon                                |
| 460 | <i>Procambarus clarkii</i> | Manú National Park    | PER | 89.86  | Amazon                                |

|     |                            |                                       |     |       |                                        |
|-----|----------------------------|---------------------------------------|-----|-------|----------------------------------------|
| 461 | <i>Procambarus clarkii</i> | El Mangrullo                          | ARG | 84.96 | Negro                                  |
| 462 | <i>Procambarus clarkii</i> | Mar Chiquita                          | ARG | 83.65 | North Argentina, South Atlantic Coast  |
| 463 | <i>Procambarus clarkii</i> | La Reforma                            | ARG | 82.94 | South America, Colorado                |
| 464 | <i>Procambarus clarkii</i> | El Palmar                             | ARG | 82.21 | La Plata                               |
| 465 | <i>Procambarus clarkii</i> | Embalse Casa de Piedra                | ARG | 80.82 | South America, Colorado                |
| 466 | <i>Procambarus clarkii</i> | Acambuco                              | ARG | 80.04 | La Plata                               |
| 467 | <i>Procambarus clarkii</i> | Pichi Mahuida                         | ARG | 78.97 | South America, Colorado                |
| 468 | <i>Procambarus clarkii</i> | Reserva Biológica União               | BRA | 77.57 | Uruguay - Brazil, South Atlantic Coast |
| 469 | <i>Procambarus clarkii</i> | Monte de las Barrancas                | ARG | 76.52 | Salinas Grandes                        |
| 470 | <i>Procambarus clarkii</i> | Parque Estadual Da Serra Do Tabuleiro | BRA | 75.56 | Uruguay - Brazil, South Atlantic Coast |
| 471 | <i>Procambarus clarkii</i> | Limay Mahuida                         | ARG | 71.74 | South America, Colorado                |
| 472 | <i>Procambarus clarkii</i> | Rincón de Santa María                 | ARG | 71.38 | La Plata                               |
| 473 | <i>Procambarus clarkii</i> | Ernesto Tornquist                     | ARG | 69.90 | North Argentina, South Atlantic Coast  |
| 474 | <i>Procambarus clarkii</i> | Parque Nacional De São Joaquim        | BRA | 65.87 | Uruguay - Brazil, South Atlantic Coast |
| 475 | <i>Procambarus clarkii</i> | de Cutervo                            | PER | 64.85 | Amazon                                 |

|     |                            |                                                       |     |       |                                        |
|-----|----------------------------|-------------------------------------------------------|-----|-------|----------------------------------------|
| 476 | <i>Procambarus clarkii</i> | Agua Dulce                                            | ARG | 61.91 | La Plata                               |
| 477 | <i>Procambarus clarkii</i> | Reserva Biológica Estadual Do Aguai                   | BRA | 56.54 | Uruguay - Brazil, South Atlantic Coast |
| 478 | <i>Procambarus clarkii</i> | Punta Lara                                            | ARG | 55.84 | La Plata                               |
| 479 | <i>Procambarus clarkii</i> | Reserva Biológica Do Tinguá                           | BRA | 55.43 | Uruguay - Brazil, South Atlantic Coast |
| 480 | <i>Procambarus clarkii</i> | Laguna Guatrache                                      | ARG | 54.62 | Pampas Region                          |
| 481 | <i>Procambarus clarkii</i> | Parque Estadual Do Morro Do Chapéu                    | BRA | 54.17 | Sao Francisco                          |
| 482 | <i>Procambarus clarkii</i> | Reserva Biológica De Poço Das Antas                   | BRA | 50.65 | Uruguay - Brazil, South Atlantic Coast |
| 483 | <i>Procambarus clarkii</i> | Chancani                                              | ARG | 50.04 | Salinas Grandes                        |
| 484 | <i>Procambarus clarkii</i> | Reserva Biológica Do Mato Grande                      | BRA | 49.74 | Uruguay - Brazil, South Atlantic Coast |
| 485 | <i>Procambarus clarkii</i> | Quebrada del Portugués                                | ARG | 47.99 | Mar Chiquita                           |
| 486 | <i>Procambarus clarkii</i> | Área De Relevante Interesse Ecológica Serra Da Abelha | BRA | 46.79 | Uruguay - Brazil, South Atlantic Coast |
| 487 | <i>Procambarus clarkii</i> | Caleta de los Loros                                   | ARG | 45.75 | South Argentina, South Atlantic Coast  |
| 488 | <i>Procambarus clarkii</i> | Potrero de Yala                                       | ARG | 45.46 | La Plata                               |
| 489 | <i>Procambarus clarkii</i> | La Quebrada                                           | ARG | 42.19 | Mar Chiquita                           |
| 490 | <i>Procambarus clarkii</i> | Asháninka                                             | PER | 40.36 | Amazon                                 |

|     |                            |                                       |     |       |                                        |
|-----|----------------------------|---------------------------------------|-----|-------|----------------------------------------|
| 491 | <i>Procambarus clarkii</i> | Telteca                               | ARG | 39.08 | South America, Colorado                |
| 492 | <i>Procambarus clarkii</i> | Parque Nacional Da Chapada Diamantina | BRA | 35.00 | Uruguay - Brazil, South Atlantic Coast |
| 493 | <i>Procambarus clarkii</i> | Pululahua                             | ECU | 34.38 | Colombia - Ecuador, Pacific Coast      |
| 494 | <i>Procambarus clarkii</i> | Tabaconas - Namballe                  | PER | 33.32 | Amazon                                 |
| 495 | <i>Procambarus clarkii</i> | Apolobamba                            | BOL | 28.70 | Amazon                                 |
| 496 | <i>Procambarus clarkii</i> | Cerro Colorado                        | ARG | 28.15 | Mar Chiquita                           |
| 497 | <i>Procambarus clarkii</i> | Los Sosa                              | ARG | 27.00 | Mar Chiquita                           |
| 498 | <i>Procambarus clarkii</i> | Pre-Delta                             | ARG | 26.73 | La Plata                               |
| 499 | <i>Procambarus clarkii</i> | Chancaybaños                          | PER | 26.45 | Peru, Pacific Coast                    |
| 500 | <i>Procambarus clarkii</i> | Laquipampa                            | PER | 25.04 | Peru, Pacific Coast                    |
| 501 | <i>Procambarus clarkii</i> | Iguazu National Park                  | ARG | 24.44 | La Plata                               |
| 502 | <i>Procambarus clarkii</i> | Quebrada del Condorito                | ARG | 24.44 | Salinas Grandes                        |
| 503 | <i>Procambarus clarkii</i> | Iguazú                                | ARG | 24.27 | La Plata                               |
| 504 | <i>Procambarus clarkii</i> | Teniente Agripino Enciso              | PRY | 24.08 | La Plata                               |
| 505 | <i>Procambarus clarkii</i> | Medanos del Chaco                     | PRY | 23.11 | La Plata                               |

|     |                            |                              |     |       |                                        |
|-----|----------------------------|------------------------------|-----|-------|----------------------------------------|
| 506 | <i>Procambarus clarkii</i> | Sierra Pintada               | ARG | 22.53 | South America, Colorado                |
| 507 | <i>Procambarus clarkii</i> | Apipé Grande                 | ARG | 21.67 | La Plata                               |
| 508 | <i>Procambarus clarkii</i> | de Pagaibamba                | PER | 20.78 | Amazon                                 |
| 509 | <i>Procambarus clarkii</i> | Meseta de Somuncurá          | ARG | 18.22 | South Argentina, South Atlantic Coast  |
| 510 | <i>Procambarus clarkii</i> | Refugio Bilológico Tati Yupi | PRY | 17.02 | La Plata                               |
| 511 | <i>Procambarus clarkii</i> | La Angostura                 | ARG | 16.72 | Mar Chiquita                           |
| 512 | <i>Procambarus clarkii</i> | Del Medio - Los Caballos     | ARG | 16.00 | La Plata                               |
| 513 | <i>Procambarus clarkii</i> | San Miguel                   | URY | 15.36 | Uruguay - Brazil, South Atlantic Coast |
| 514 | <i>Procambarus clarkii</i> | Sierra el Peligro            | COL | 14.80 | Magdalena                              |
| 515 | <i>Procambarus clarkii</i> | Laguna Hu                    | ARG | 14.31 | La Plata                               |
| 516 | <i>Procambarus clarkii</i> | Parque Nacional De Caparao   | BRA | 14.13 | Uruguay - Brazil, South Atlantic Coast |
| 517 | <i>Procambarus clarkii</i> | Rincón de Ajó                | ARG | 13.79 | North Argentina, South Atlantic Coast  |
| 518 | <i>Procambarus clarkii</i> | Laguna La Felipa             | ARG | 12.76 | La Plata                               |
| 519 | <i>Procambarus clarkii</i> | Los Cardones                 | ARG | 12.40 | La Plata                               |
| 520 | <i>Procambarus clarkii</i> | Cerro Cora                   | PRY | 12.26 | La Plata                               |

|     |                            |                                                  |     |      |                                        |
|-----|----------------------------|--------------------------------------------------|-----|------|----------------------------------------|
| 521 | <i>Procambarus clarkii</i> | Machiguenga                                      | PER | 9.82 | Amazon                                 |
| 522 | <i>Procambarus clarkii</i> | Bosque Fray Jorge                                | CHL | 9.78 | North Chile, Pacific Coast             |
| 523 | <i>Procambarus clarkii</i> | Parque Estadual Da Cantareira                    | BRA | 9.73 | La Plata                               |
| 524 | <i>Procambarus clarkii</i> | Área De Proteção Ambiental De Maricá             | BRA | 9.69 | Uruguay - Brazil, South Atlantic Coast |
| 525 | <i>Procambarus clarkii</i> | Auca Mahuida                                     | ARG | 9.49 | Negro                                  |
| 526 | <i>Procambarus clarkii</i> | Pampa Hermosa                                    | PER | 9.38 | Amazon                                 |
| 527 | <i>Procambarus clarkii</i> | Iguaque                                          | COL | 7.70 | Magdalena                              |
| 528 | <i>Procambarus clarkii</i> | Área De Proteção Ambiental Da Serra De Sapiatiba | BRA | 6.54 | Uruguay - Brazil, South Atlantic Coast |
| 529 | <i>Procambarus clarkii</i> | Floresta Nacional De Ibirama                     | BRA | 5.19 | Uruguay - Brazil, South Atlantic Coast |
| 530 | <i>Procambarus clarkii</i> | Divisadero Largo                                 | ARG | 5.08 | South America, Colorado                |
| 531 | <i>Procambarus clarkii</i> | Floresta Nacional De Mário Xavier                | BRA | 4.96 | Uruguay - Brazil, South Atlantic Coast |
| 532 | <i>Procambarus clarkii</i> | Parque Estadual Do Jaraguá                       | BRA | 4.92 | La Plata                               |
| 533 | <i>Procambarus clarkii</i> | Parque Estadual Da Serra Furada                  | BRA | 3.88 | Uruguay - Brazil, South Atlantic Coast |
| 534 | <i>Procambarus clarkii</i> | Cayastá                                          | ARG | 3.70 | La Plata                               |
| 535 | <i>Procambarus clarkii</i> | Pampa del Indio                                  | ARG | 3.54 | La Plata                               |

|     |                            |                                                             |     |      |                                        |
|-----|----------------------------|-------------------------------------------------------------|-----|------|----------------------------------------|
| 536 | <i>Procambarus clarkii</i> | Parque Estadual Serra Do Brigadeiro                         | BRA | 3.28 | Uruguay - Brazil, South Atlantic Coast |
| 537 | <i>Procambarus clarkii</i> | Cajas                                                       | ECU | 3.20 | Colombia - Ecuador, Pacific Coast      |
| 538 | <i>Procambarus clarkii</i> | de la Pampa de Ayacucho                                     | PER | 3.01 | Amazon                                 |
| 539 | <i>Procambarus clarkii</i> | La Florida                                                  | ARG | 2.71 | Mar Chiquita                           |
| 540 | <i>Procambarus clarkii</i> | Zona Reservada Los Pantanos de Villa                        | PER | 2.63 | Peru, Pacific Coast                    |
| 541 | <i>Procambarus clarkii</i> | Área De Relevante Interesse Ecológica Mata De Santa Genebra | BRA | 2.42 | La Plata                               |
| 542 | <i>Procambarus clarkii</i> | Moises Bertoni                                              | PRY | 2.32 | La Plata                               |
| 543 | <i>Procambarus clarkii</i> | Rio Algodonal                                               | COL | 2.24 | Caribbean Coast                        |
| 544 | <i>Procambarus clarkii</i> | Bahía San Blas                                              | ARG | 2.04 | South America, Colorado                |
| 545 | <i>Procambarus clarkii</i> | Lago Urugua-i                                               | ARG | 1.99 | La Plata                               |
| 546 | <i>Procambarus clarkii</i> | Estação Ecológica Itaberá                                   | BRA | 1.78 | La Plata                               |
| 547 | <i>Procambarus clarkii</i> | Área De Relevante Interesse Ecológica Matão De Cosmópolis   | BRA | 1.73 | La Plata                               |
| 548 | <i>Procambarus clarkii</i> | de Calipuy                                                  | PER | 1.41 | Peru, Pacific Coast                    |
| 549 | <i>Procambarus clarkii</i> | El Ángel                                                    | ECU | 1.27 | Colombia - Ecuador, Pacific Coast      |
| 550 | <i>Procambarus clarkii</i> | Reserva Extrativista Marinha Pirajubaé                      | BRA | 1.26 | Uruguay - Brazil, South Atlantic Coast |

|     |                            |                                                          |     |      |                                        |
|-----|----------------------------|----------------------------------------------------------|-----|------|----------------------------------------|
| 551 | <i>Procambarus clarkii</i> | Área De Relevante Interesse Ecológica Floresta Da Cicuta | BRA | 1.25 | Uruguay - Brazil, South Atlantic Coast |
| 552 | <i>Procambarus clarkii</i> | Floresta Nacional De Três Barras                         | BRA | 1.01 | La Plata                               |
| 553 | <i>Procambarus clarkii</i> | Estação Ecológica De Itapeva                             | BRA | 0.99 | La Plata                               |
| 554 | <i>Procambarus clarkii</i> | Estação Ecológica Ibicatu                                | BRA | 0.82 | La Plata                               |
| 555 | <i>Procambarus clarkii</i> | Teyú Cuare                                               | ARG | 0.79 | La Plata                               |
| 556 | <i>Procambarus clarkii</i> | Área De Proteção Ambiental De Petrópolis                 | BRA | 0.76 | Uruguay - Brazil, South Atlantic Coast |
| 557 | <i>Procambarus clarkii</i> | Parque Estadual Da Ara                                   | BRA | 0.67 | La Plata                               |
| 558 | <i>Procambarus clarkii</i> | Guanenta Alto Rio Fonce                                  | COL | 0.40 | Magdalena                              |
| 559 | <i>Procambarus clarkii</i> | Carabajal                                                | ARG | 0.33 | La Plata                               |
| 560 | <i>Procambarus clarkii</i> | El Malmo                                                 | COL | 0.32 | Orinoco                                |
| 561 | <i>Procambarus clarkii</i> | Aledaño a la Bocatoma del Canal Nuevo Imperial           | PER | 0.18 | Peru, Pacific Coast                    |
| 562 | <i>Procambarus clarkii</i> | Estação Ecológica Valinhos                               | BRA | 0.18 | La Plata                               |
| 563 | <i>Procambarus clarkii</i> | Humedal el Yali                                          | CHL | 0.14 | North Chile, Pacific Coast             |
| 564 | <i>Procambarus clarkii</i> | Luís Honorio Rolón                                       | ARG | 0.13 | La Plata                               |
| 565 | <i>Procambarus clarkii</i> | Colonia Benítez                                          | ARG | 0.07 | La Plata                               |

566

*Procambarus clarkii*

Amboró

BOL

0.02

Amazon

---
